# Supplementary material for: Organocatalytic asymmetric Michael addition reaction of aldehydes with 2-furanones: experimental, applications and DFT studies
Source: Royal Society of Chemistry journal article supplement (doi:10.1039/d2qo01891h), 2023-01-01
Supplement: d2qo01891h1.pdf [file d2qo01891h1.pdf]

# Organocatalytic Asymmetric Michael Addition Reaction of Aldehydes to 2-Furanones: Experimental, Applications and DFT Studies †

Xiao You<sup>a†</sup>, Wenning Zhu<sup>a†</sup>, Jiacheng Du<sup>a†</sup>, Yuehua Liu<sup>a</sup>, Fumin Chen<sup>a</sup>, Yongshuai Chai<sup>a††</sup>, Qiang Zhang<sup>a</sup>, Jingxiang Pang<sup>\*b</sup>, Aiqin Liu<sup>\*a</sup> and Zhushuang Bai<sup>\*a</sup>

<sup>a</sup>School of Pharmacy and Pharmaceutical Science & Institute of Materia Medica, Shandong First Medical University & Shandong Academy of Medical Sciences, NHC Key Laboratory of biotechnology drug (Shandong Academy of Medical Sciences), Key Lab for Rare & Uncommon Diseases of Shandong Province, Jinan 250117, China. E-mail: baizhushuang@sdfmu.edu.cn

<sup>b</sup> Shandong Medicinal Biotechnology Centre, Key Laboratory for Rare and Uncommon Diseases of Shandong Province, Key Lab for Biotechnology Drugs of Ministry of Health, Shandong First Medical University & Shandong Academy of Medical Sciences, Jinan, China .

† These authors contributed equally to this work.

## Content

|                                                                                |     |
|--------------------------------------------------------------------------------|-----|
| 1. General methods .....                                                       | S2  |
| 1.1 Materials .....                                                            | S2  |
| 2. Synthesis and characterization of compounds <b>3-11</b> .....               | S2  |
| 2.1 General procedure for the organocatalytic Michael addition reactions ..... | S2  |
| 2.2 Scope of the Michael addition reaction .....                               | S3  |
| 3. Determination of the configuration of products <b>3</b> .....               | S13 |
| 3.1 Determination of the absolute configuration of products <b>3aa</b> .....   | S13 |
| 4. DFT calculations .....                                                      | S15 |
| 4.1 Computational Information .....                                            | S15 |
| 4.2 Calculated total energies and cartesian coordinates .....                  | S16 |
| 4.3 References .....                                                           | S66 |
| 5. NMR Spectra for Michael Product <b>3-11</b> .....                           | S68 |
| 6. HPLC data for Michael Product <b>3</b> .....                                | S90 |

## 1. General methods

$^1\text{H}$  NMR spectra and  $^{13}\text{C}$  NMR spectra were recorded on a Bruker AVANCE III 400 (400MHz) or Bruker AVANCE III 600 (600MHz) spectrometer in needful D-reagents with tetramethylsilane (TMS) as an internal reference. Data for  $^1\text{H}$  NMR were reported as follows: chemical shift (ppm), and multiplicity (s= singlet, d= doublet, t= triplet, dd= double of doublet, br= broad, m= multiplet), coupling constants (Hz) and integration; Data for  $^{13}\text{C}$  NMR were reported as ppm. HPLC analyses were performed using a Daicel ChiralPak OD or AD column purchased. Crystal structure determination of Michael product **3aa** was carried out on a Rigaku MicroMax 002+ diffractometer. HRMS of Michael products were carried out AB SCIEX X500R QTOF.

### 1.1 Materials

Unless otherwise stated, all reagents were purchased from commercial suppliers, including, aldehydes and catalysts **I**, **II**, **V** and **VI**. Ethyl 5, 5-disubstituted-2-oxo-2,5-dihydrofuran-3-carboxylates **1a-c** were prepared according to literature procedures and all the spectral data of **1a-c** matches with the desired compounds<sup>[1]</sup>. Catalysts **III**<sup>[2]</sup> and **IV**<sup>[2]</sup> were prepared according to the literature procedures and all the spectral data matches with the desired compounds. All the reactions were monitored by thin layer chromatography (TLC) on GF254 silica gel plates.

### Reference

- [1] W. Wang, J. Wang, S. Zhou, Q. Sun, Z. Ge, X. Wang and R. Li. *Chem. Commun.*, 2013, **49**, 1333.  
[2] C. B. Tripathi, S. Kayal and S. Mukherjee, *Org. Lett.*, 2012, **14**, 3296.

## 2. Synthesis and characterization of compounds 3-11

### 2.1 General procedure for the organocatalytic Michael addition reactions

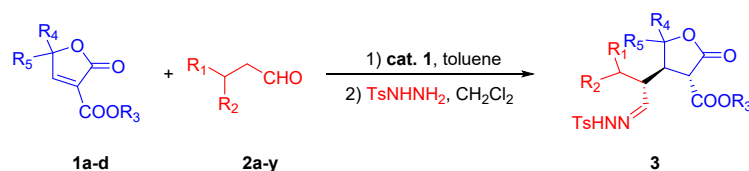

To a suspension of catalyst **I** (20% mol, Pyrrolidine is used for the preparation of racemic samples) and 2-furanone **1** (1.0 mmol) in toluene was added aldehyde **2** (2.0 mmol) and stirred at room temperature for 12h under  $\text{N}_2$ . Then  $\text{NH}_4\text{Cl}$  was added to the reaction mixture, extracted with ethyl acetate and concentrated in vacuo. The residue was purified by flash column chromatography (EtOAc: petroleum =1:5) to afford the Michael adduct. *p*-toluenesulfonyl hydrazide  $\text{TsNHNH}_2$  (1.5 mmol) and anhydrous  $\text{MgSO}_4$  (5 mmol) was added to a solution of above purified product in dichloromethane (10 mL) at  $0^\circ\text{C}$ . The resulting mixture was left with stirring for 24h. The reaction was concentrated under reduced pressure and purified by flash column chromatography (EtOAc:petroleum = 1:2) to afford hydrazine **3**.

## 2.2 Scope of the Michael addition reaction

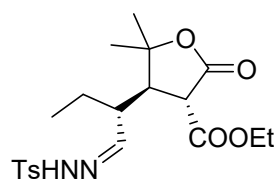

**(3*S*,4*R*)-ethyl-5,5-dimethyl-2-oxo-4-((*R*)-1-(2-tosylhydrazinyl)butan-2-yl)tetrahydrofuran-3-carboxylate 3aa:** Obtained in 87% yield. white solid.  $^1\text{H NMR}$  (400 MHz,  $\text{CDCl}_3$ )  $\delta$  8.16 – 7.72 (m, 3H), 7.39 – 7.29 (m, 2H), 6.91 – 6.72 (m, 1H), 4.37 – 4.04 (m, 2H), 3.52 – 3.28 (m, 1H), 2.89 – 2.66 (m, 1H), 2.43 (d,  $J = 3.6$  Hz, 3H), 1.38 – 1.05 (m, 11H), 0.66 (m, 3H).  $^{13}\text{C NMR}$  (100 MHz,  $\text{CDCl}_3$ )  $\delta$  170.0, 168.3, 151.76, 144.5, 135.3, 129.8, 128.0, 85.7, 62.5, 52.2, 51.2, 44.4, 27.8, 24.1, 22.9, 21.6, 14.0, 11.3. HPLC(CHIRAL-AD-H, 228nm, hexane: *i*-PrOH =85:15, 1.0mL/min,  $t_{\text{R1}}$ (minor) = 21.857 min,  $t_{\text{R1}}$ (major) = 26.117 min,  $t_{\text{R2}}$ (major) = 33.801 min,  $t_{\text{R2}}$ (minor) = 46.868 min ). dr= 8.3:1. 99%/96% ee. ES-HRMS: Calcd for  $\text{C}_{21}\text{H}_{31}\text{N}_2\text{O}_6\text{S}$  [M+H], 439.1903, Found 439.1896.

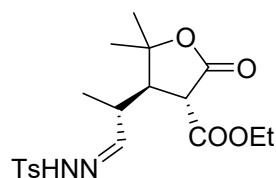

**(3*S*,4*R*)-ethyl-5,5-dimethyl-2-oxo-4-((*R*)-1-(2-tosylhydrazinyl)propan-2-yl)tetrahydrofuran-3-carboxylate 3ab:** Obtained in 88% yield, white solid.  $^1\text{H NMR}$  (400 MHz,  $\text{CDCl}_3$ )  $\delta$  7.97 (s, 1H), 7.81 (d,  $J = 8.2$  Hz, 2H), 7.33 (d,  $J = 8.1$  Hz, 2H), 6.90 (d,  $J = 7.9$  Hz, 1H), 4.26 (q,  $J = 7.1$  Hz, 2H), 3.41 (d,  $J = 12.0$  Hz, 1H), 2.73 (t,  $J = 11.4$  Hz, 1H), 2.60 – 2.48 (m, 1H), 2.44 (s, 3H), 1.30 (t,  $J = 7.1$  Hz, 3H), 1.06 (d,  $J = 8.6$  Hz, 6H), 0.98 (d,  $J = 6.8$  Hz, 3H).  $^{13}\text{C NMR}$  (100 MHz,  $\text{CDCl}_3$ )  $\delta$  169.8, 168.2, 152.3, 144.6, 135.2, 129.8, 128.1, 85.5, 62.5, 52.1, 52.0, 37.6, 29.7, 27.7, 22.9, 21.6, 16.9, 14.0. HPLC(CHIRAL-AD-H, 254nm, hexane: *i*-PrOH =90:10, 2.0mL/min,  $t_{\text{R1}}$ (minor) = 40.310 min,  $t_{\text{R1}}$ (major) = 54.120 min ). dr>9.2:1. 86 %/n.d. ee. ES-HRMS: Calcd for  $\text{C}_{19}\text{H}_{27}\text{N}_2\text{O}_6\text{S}$  [M+H], 411.1590, Found 411.1580.

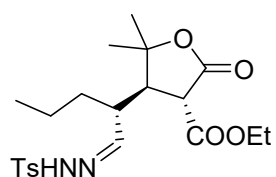

**(3*S*,4*R*)-ethyl-5,5-dimethyl-2-oxo-4-((*R,E*)-1-(2-tosylhydrazono)pentan-2-yl)tetrahydrofuran-3-carboxylate 3ac.** Obtained in 85% yield, white solid.  $^1\text{H NMR}$  (400 MHz,  $\text{CDCl}_3$ )  $\delta$  8.22 – 8.11 (m, 1H), 7.86 (t,  $J = 9.0$  Hz, 2H), 7.38 (dd,  $J = 8.0, 3.5$  Hz, 2H), 6.86 (dd,  $J = 15.2, 8.2$  Hz, 1H), 4.44 – 4.13 (m, 2H), 3.49 (dd,  $J = 15.3, 12.1$  Hz, 1H), 2.92 – 2.75 (m, 1H), 2.50 (d,  $J = 2.5$  Hz, 3H), 2.48 – 2.39 (m, 1H), 1.48 – 1.28 (m, 9H), 1.16 (d,  $J = 6.4$  Hz, 3H), 1.09 – 0.92 (m, 2H), 0.86 – 0.77 (m, 3H).  $^{13}\text{C NMR}$  (100 MHz,  $\text{CDCl}_3$ )  $\delta$  170.0, 169.6, 168.3, 168.1, 152.1, 151.7, 144.5, 144.4, 135.2, 135.1, 129.8, 129.7, 128.1, 127.9, 85.7, 85.3, 62.6, 62.4, 52.2, 51.9, 51.4, 51.1, 42.8, 42.8, 33.2, 33.1, 29.1, 27.8, 23.0, 22.7, 21.6, 20.0, 20.0, 14.1, 14.0, 13.7, 13.5. HPLC(CHIRAL-AD-H, 228nm, hexane: *i*-PrOH =90:10, 1.0mL/min,  $t_{\text{R1}}$ (minor) = 28.225 min,  $t_{\text{R1}}$ (major) = 36.245 min,  $t_{\text{R2}}$ (major) = 48.591 min,  $t_{\text{R2}}$ (minor) = 56.932 min ). dr= 5.4:1. 93 %/6 % ee. ES-HRMS: Calcd for  $\text{C}_{21}\text{H}_{31}\text{N}_2\text{O}_6\text{S}$  [M+H], 439.1903, Found 439.1896.

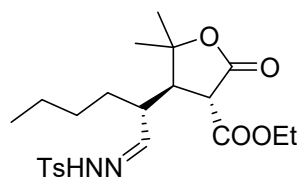

**(3S,4R)-ethyl-5,5-dimethyl-2-oxo-4-((R,E)-1-(2-tosylhydrazono)hexan-2-yl)tetrahydrofuran-3-carboxylate 3ad.** Obtained in 82% yield, white solid.  $^1\text{H NMR}$  (400 MHz,  $\text{CDCl}_3$ )  $\delta$  8.07 (d,  $J = 8.5$  Hz, 1H), 7.80 (dd,  $J = 11.5, 5.9$  Hz, 2H), 7.31 (t,  $J = 6.3$  Hz, 2H), 6.79 (dd,  $J = 12.7, 8.2$  Hz, 1H), 4.39 – 4.13 (m, 2H), 3.43 (dd,  $J = 17.4, 12.1$  Hz, 1H), 2.80 – 2.69 (m, 1H), 2.41 (s, 3H), 2.40 – 2.30 (m, 1H), 1.54 (s, 3H), 1.41 – 1.05 (m, 10H), 0.97 – 0.83 (m, 2H), 0.73 (t,  $J = 7.4$  Hz, 3H).  $^{13}\text{C NMR}$  (100 MHz,  $\text{CDCl}_3$ )  $\delta$  169.6, 168.1, 152.1, 144.4, 135.1, 129.7, 127.9, 85.3, 62.6, 51.9, 51.1, 43.1, 30.9, 29.1, 29.1, 22.7, 22.2, 21.6, 14.1, 13.8. HPLC(CHIRAL-AD-H, 228nm, hexane: i-PrOH =90:10, 1.0mL/min,  $t_{\text{R1}}$ (minor) = 22.126 min,  $t_{\text{R1}}$ (major) = 27.062 min,  $t_{\text{R2}}$ (major) = 35.431 min,  $t_{\text{R2}}$ (minor) = 46.065 min ). dr= 4.4:1. 91 %/35 % ee. ES-HRMS: Calcd for  $\text{C}_{22}\text{H}_{33}\text{N}_2\text{O}_6\text{S}$  [M+H], 453.2059, Found 453.2051.

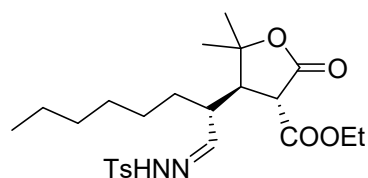

**(3S,4R)-ethyl-5,5-dimethyl-2-oxo-4-((R,E)-1-(2-tosylhydrazono)octan-2-yl)tetrahydrofuran-3-carboxylate 3ae.** Obtained in 80% yield, white solid.  $^1\text{H NMR}$  (400 MHz,  $\text{CDCl}_3$ )  $\delta$  8.15 (s, 1H), 7.77 (d,  $J = 8.3$  Hz, 2H), 7.35 – 7.23 (m, 2H), 6.80 (d,  $J = 8.1$  Hz, 1H), 4.31 – 4.11 (m, 2H), 3.47 (d,  $J = 12.3$  Hz, 1H), 2.77 (dd,  $J = 12.2, 9.3$  Hz, 1H), 2.41 (s, 3H), 2.34 (dd,  $J = 14.8, 6.2$  Hz, 1H), 1.53 (s, 3H), 1.31 (t,  $J = 7.1$  Hz, 11H), 1.25 – 1.02 (m, 5H), 0.86 (dt,  $J = 14.6, 7.1$  Hz, 3H).  $^{13}\text{C NMR}$  (150 MHz,  $\text{CDCl}_3$ )  $\delta$  170.1, 168.4, 151.9, 144.5, 135.3, 129.8, 128.0, 85.8, 62.4, 52.3, 51.5, 43.1, 31.5, 31.1, 29.0, 27.8, 26.7, 22.9, 22.5, 21.6, 14.0. HPLC(CHIRAL-AD-H, 254nm, hexane: i-PrOH =90:10, 2.0mL/min,  $t_{\text{R1}}$ (minor) = 10.289 min,  $t_{\text{R1}}$ (major) = 11.483 min,  $t_{\text{R2}}$ (minor) = 15.872 min,  $t_{\text{R2}}$ (major) = 21.764 min ). dr= 2.3:1. 92 %/29 % ee. ES-HRMS: Calcd for  $\text{C}_{24}\text{H}_{37}\text{N}_2\text{O}_6\text{S}$  [M+H], 481.2372, Found 481.2378.

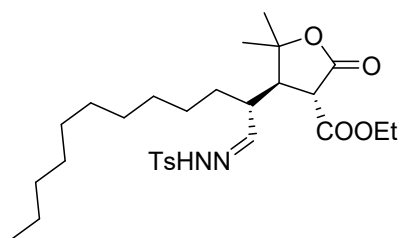

**(3S,4R)-ethyl-5,5-dimethyl-2-oxo-4-((R,E)-1-(2-tosylhydrazono)dodecan-2-yl)tetrahydrofuran-3-carboxylate 3af.** Obtained in 79% yield, white oil.  $^1\text{H NMR}$  (400 MHz,  $\text{CDCl}_3$ )  $\delta$  7.85 – 7.75 (m, 2H), 7.34 – 7.27 (m, 2H), 6.85 – 6.77 (m, 1H), 4.38 – 4.07 (m, 2H), 3.62 – 3.27 (m, 1H), 2.85 – 2.70 (m, 1H), 2.47 – 2.29 (m, 4H), 1.61 – 0.80 (m, 30H).  $^{13}\text{C NMR}$  (100 MHz,  $\text{CDCl}_3$ )  $\delta$  169.7, 168.2, 152.2, 144.3, 135.2, 129.7, 127.8, 85.5, 62.7, 51.9, 51.2, 43.0, 31.9, 31.2, 29.6, 29.4, 29.3, 29.2, 29.0, 27.0, 22.7, 21.6, 14.1, 14.0. HPLC(CHIRAL-OD-H, 254 nm, hexane: i-PrOH =95:5, 2.0mL/min,  $t_{\text{R1}}$ (major) = 10.257 min,  $t_{\text{R1}}$ (minor) = 13.346 min,  $t_{\text{R2}}$ (major) = 21.540 min,  $t_{\text{R2}}$ (minor) = 32.443 min ). dr= 5.4:1. 78 %/21 % ee. ES-HRMS: Calcd for  $\text{C}_{28}\text{H}_{45}\text{N}_2\text{O}_6\text{S}$  [M+H], 537.2998, Found 537.2977.

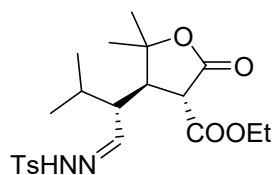

**(3*S*,4*R*)-ethyl-5,5-dimethyl-4-((*R,E*)-3-methyl-1-(2-tosylhydrazono)butan-2-yl)-2-oxotetrahydrofuran-3-carboxylate 3ag.** Obtained in 53% yield, white solid.  $^1\text{H NMR}$  (600 MHz,  $\text{CDCl}_3$ )  $\delta$  7.75 – 7.69 (m, 2H), 7.23 (d,  $J = 8.0$  Hz, 2H), 6.81 (d,  $J = 8.5$  Hz, 1H), 4.24 – 4.03 (m, 2H), 3.29 (d,  $J = 12.3$  Hz, 1H), 2.91 (dd,  $J = 12.2, 9.2$  Hz, 1H), 2.35 (s, 3H), 2.21 – 2.17 (m, 1H), 1.77 – 1.66 (m, 1H), 1.47 (s, 3H), 1.25 (t,  $J = 7.1$  Hz, 3H), 1.14 (s, 3H), 0.78 (d,  $J = 6.8$  Hz, 3H), 0.62 (d,  $J = 6.7$  Hz, 3H).  $^{13}\text{C NMR}$  (100 MHz,  $\text{CDCl}_3$ )  $\delta$  168.8, 167.2, 149.2, 143.3, 134.2, 128.6, 126.8, 84.6, 61.6, 50.7, 47.4, 47.3, 27.5, 27.4, 21.5, 20.5, 20.3, 16.0, 13.0. HPLC(CHIRAL-AD-H, 228 nm, hexane: *i*-PrOH =90:10, 1.0mL/min,  $t_{\text{R1}}$ (minor) = 28.455 min,  $t_{\text{R1}}$ (major) = 41.080 min). dr = >20:1. 95 %/n.d. ee. ES-HRMS: Calcd for  $\text{C}_{21}\text{H}_{31}\text{N}_2\text{O}_6\text{S}$  [ $\text{M}+\text{H}$ ], 439.1903, Found 439.1910.

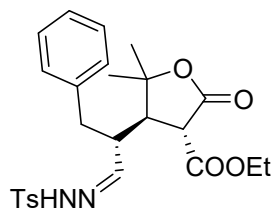

**(3*S*,4*R*)-ethyl-5,5-dimethyl-2-oxo-4-((*R,E*)-1-phenyl-3-(2-tosylhydrazono)propan-2-yl)tetrahydrofuran-3-carboxylate 3ah.** Obtained in 84% yield, white solid.  $^1\text{H NMR}$  (400 MHz,  $\text{CDCl}_3$ )  $\delta$  8.16 – 8.00 (m, 1H), 7.64 (dd,  $J = 10.5, 8.4$  Hz, 2H), 7.23 (d,  $J = 8.2$  Hz, 2H), 7.12 – 7.07 (m, 3H), 6.94 – 6.86 (m, 3H), 4.35 – 4.14 (m, 2H), 3.56 (d,  $J = 12.2$  Hz, 1H), 3.04 – 2.87 (m, 1H), 2.88 – 2.56 (m, 3H), 2.51 – 2.37 (m, 3H), 1.50 (s, 3H), 1.38 – 1.24 (m, 6H).  $^{13}\text{C NMR}$  (100 MHz,  $\text{CDCl}_3$ )  $\delta$  169.9, 169.8, 168.3, 168.2, 151.0, 150.5, 144.2, 144.1, 137.3, 136.9, 135.3, 135.2, 129.7, 129.7, 128.8, 128.8, 128.5, 127.8, 127.6, 126.6, 126.6, 86.0, 85.5, 62.8, 62.6, 52.3, 51.5, 51.3, 50.8, 44.2, 43.8, 37.8, 37.6, 28.5, 27.9, 23.2, 22.7, 21.6, 14.0. HPLC(CHIRAL-AD-H, 210 nm, hexane: *i*-PrOH =80:20, 2.0mL/min,  $t_{\text{R1}}$ (major) =6.328min,  $t_{\text{R1}}$ (minor) = 7.987 min,  $t_{\text{R2}}$ (major) = 16.498 min,  $t_{\text{R2}}$ (minor) = 50.885min). dr= 1.5:1. 88 %/78 % ee. ES-HRMS: Calcd for  $\text{C}_{25}\text{H}_{30}\text{N}_2\text{NaO}_7\text{S}$  [ $\text{M}+\text{Na}$ ], 509.1722, Found 509.1607.

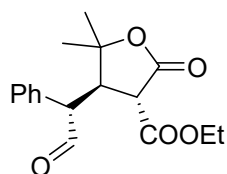

**ethyl (3*S*,4*R*)-5,5-dimethyl-2-oxo-4-((*S*)-2-oxo-1-phenylethyl)tetrahydrofuran-3-carboxylate 3ai.** Obtained in 82% yield, white oil.  $^1\text{H NMR}$  (400 MHz,  $\text{CDCl}_3$ )  $\delta$  9.72 (d,  $J = 1.2$  Hz, 1H), 9.51 (d,  $J = 2.4$  Hz, 1H), 7.48 – 7.17 (m, 10H), 4.40 – 4.25 (m, 2H), 3.89 – 3.46 (m, 7H), 3.34 (d,  $J = 9.4$  Hz, 1H), 1.65 (s, 3H), 1.40 (s, 3H), 1.36 (t,  $J = 7.1$  Hz, 3H), 1.31 (s, 3H), 1.03 – 0.95 (m, 3H).  $^{13}\text{C NMR}$  (100 MHz,  $\text{CDCl}_3$ )  $\delta$  197.8, 197.2, 169.8, 169.8, 167.9, 167.3, 132.9, 131.7, 130.1, 129.7, 129.5, 129.4, 128.9, 85.8, 85.6, 62.5, 62.0, 60.1, 59.9, 52.7, 52.0, 49.2, 49.1, 28.8, 28.3, 24.0, 23.2, 14.1, 13.7. HPLC(CHIRAL-AD-H, 210 nm, hexane: *i*-PrOH =80:20, 2.0mL/min,  $t_{\text{R1}}$ (minor) = 14.845 min,  $t_{\text{R1}}$ (major) = 16.001 min,  $t_{\text{R2}}$ (minor) = 21.856 min,  $t_{\text{R2}}$ (major) = 22.325 min). dr= 1:1.2. 92 %/69 % ee. ESI-HRMS: Calcd for  $\text{C}_{17}\text{H}_{20}\text{NaO}_5$  [ $\text{M}+\text{Na}$ ], 327.1208, Found 327.1133.

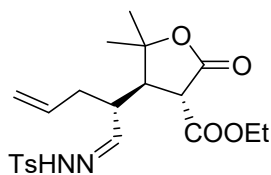

**(3*S*,4*R*)-ethyl-5,5-dimethyl-2-oxo-4-((*R,E*)-1-(2-tosylhydrazono)pent-4-en-2-yl)tetrahydrofuran-3-carboxylate 3aj.** Obtained in 89% yield, white solid.  $^1\text{H NMR}$  (400 MHz,  $\text{CDCl}_3$ )  $\delta$  8.29 (d,  $J = 101.5$  Hz, 1H), 7.78 (t,  $J = 8.6$  Hz, 2H), 7.31 (dd,  $J = 8.1, 3.6$  Hz, 2H), 6.84 (t,  $J = 8.6$  Hz, 1H), 5.48 – 5.28 (m, 1H), 4.94 – 4.79 (m, 2H), 4.31 – 4.10 (m, 2H), 3.46 (dd,  $J = 12.0, 9.4$  Hz, 1H), 2.88 – 2.74 (m, 1H), 2.55 – 2.46 (m, 1H), 2.42 (d,  $J = 2.5$  Hz, 3H), 2.32 – 1.93 (m, 2H), 1.30 (td,  $J = 7.1, 2.1$  Hz, 3H), 1.27 – 1.18 (m, 3H), 1.08 (d,  $J = 4.3$  Hz, 3H).  $^{13}\text{C NMR}$  (100 MHz,  $\text{CDCl}_3$ )  $\delta$  169.9, 169.7, 168.2, 168.1, 151.3, 151.3, 144.5, 144.4, 135.3, 135.2, 133.6, 133.5, 129.8, 129.7, 128.1, 127.9, 118.1, 85.8, 85.4, 62.6, 62.5, 52.2, 51.4, 50.8, 50.5, 42.5, 42.2, 35.7, 35.5, 28.8, 27.8, 23.0, 22.8, 21.6, 21.6, 14.0, 14.0. HPLC(CHIRAL-AD-H, 254 nm, hexane: *i*-PrOH =90:10, 2.0mL/min,  $t_{\text{R1}}$ (minor) = 18.911 min,  $t_{\text{R1}}$ (major) = 21.988 min,  $t_{\text{R2}}$ (major) = 42.280 min,  $t_{\text{R2}}$ (minor) = 49.230 min ). dr = 1.2:1. 87 %/82 % ee. ES-HRMS: Calcd for  $\text{C}_{21}\text{H}_{29}\text{N}_2\text{O}_6\text{S}$  [M+H], 437.1746, Found 437.1722.

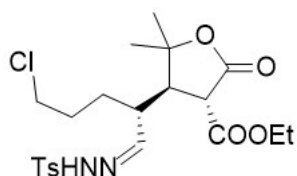

**(3*S*,4*R*)-ethyl-4-((*R,E*)-5-chloro-1-(2-tosylhydrazono)pentan-2-yl)-5,5-dimethyl-2-oxotetrahydrofuran-3-carboxylate 3ak.** Obtained in 82% yield, white oil.  $^1\text{H NMR}$  (400 MHz,  $\text{CDCl}_3$ )  $\delta$  8.38 (s, 1H), 7.90 – 7.73 (m, 2H), 7.32 (d,  $J = 8.1$  Hz, 2H), 6.85 (d,  $J = 8.1$  Hz, 1H), 4.44 – 4.00 (m, 2H), 3.71 – 3.23 (m, 3H), 2.94 – 2.61 (m, 1H), 2.48 – 2.24 (m, 4H), 1.85 – 1.17 (m, 13H).  $^{13}\text{C NMR}$  (100 MHz,  $\text{CDCl}_3$ )  $\delta$  169.6, 168.1, 151.3, 144.5, 135.1, 129.8, 127.9, 85.5, 62.7, 51.8, 51.3, 43.7, 42.1, 29.2, 29.1, 27.9, 22.7, 21.6, 14.0. HPLC(CHIRAL-OD-H, 210 nm, hexane: *i*-PrOH =95:5, 2.0mL/min,  $t_{\text{R1}}$ (major) = 30.074 min,  $t_{\text{R1}}$ (minor) = 37.612 min, dr = 5.9:1, 82%/-- ee. ES-HRMS: Calcd for  $\text{C}_{21}\text{H}_{29}\text{ClN}_2\text{NaO}_6\text{S}$  [M+Na], 495.1333, Found 495.1334.

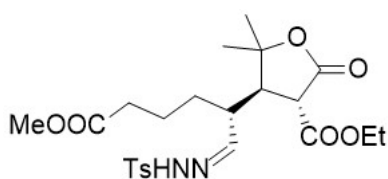

**(3*S*,4*R*)-ethyl-4-((*R,E*)-6-methoxy-6-oxo-1-(2-tosylhydrazono)hexan-2-yl)-5,5-dimethyl-2-oxotetrahydrofuran-3-carboxylate 3al.** Obtained in 68% yield, white oil.  $^1\text{H NMR}$  (400 MHz,  $\text{CDCl}_3$ )  $\delta$  8.64 (m, 1H), 7.79 (t,  $J = 7.9$  Hz, 2H), 7.31 (dd,  $J = 8.1, 3.5$  Hz, 2H), 6.88 (dd,  $J = 8.0, 5.5$  Hz, 1H), 4.36 – 4.06 (m, 2H), 3.65 (d,  $J = 1.9$  Hz, 3H), 3.45 (dd,  $J = 19.6, 12.1$  Hz, 1H), 2.83 – 2.67 (m, 1H), 2.42 (m, 4H), 2.15 (dt,  $J = 9.6, 6.7$  Hz, 2H), 2.06 – 2.01 (m, 1H), 1.43 – 1.19 (m, 9H), 1.06 (s, 3H).  $^{13}\text{C NMR}$  (100 MHz,  $\text{CDCl}_3$ )  $\delta$  173.4, 170.0, 169.7, 168.4, 168.1, 151.5, 151.4, 144.5, 144.3, 135.3, 135.2, 129.8, 129.7, 128.0, 127.8, 85.8, 85.6, 62.7, 62.5, 52.2, 51.7, 51.7, 51.3, 51.2, 42.7, 42.6, 33.2, 32.8, 30.3, 30.2, 29.0, 27.7, 22.8, 22.7, 22.0, 21.9, 21.6, 14.0, 14.0. HPLC(CHIRAL-AD-H, 254 nm, hexane: *i*-PrOH =95:5, 1.0mL/min,  $t_{\text{R1}}$ (major) = 8.838 min,  $t_{\text{R1}}$ (minor) = 9.227 min. dr= 1.5:1. 92%/n.d. ee. ES-HRMS:

Calcd for C<sub>23</sub>H<sub>33</sub>N<sub>2</sub>O<sub>8</sub>S [M+H], 497.1958, Found 497.1925.

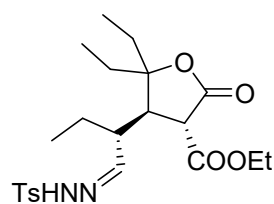

**(3S,4R)-ethyl-5,5-diethyl-2-oxo-4-((R,E)-1-(2-tosylhydrazono)butan-2-yl)tetrahydrofuran-3-carboxylate 3am.** Obtained in 52% yield, white oil. <sup>1</sup>H NMR (400 MHz, CDCl<sub>3</sub>) δ 8.21 – 7.85 (m, 1H), 7.84 – 7.77 (m, 2H), 7.34 – 7.28 (m, 2H), 6.80 (d, *J* = 8.1 Hz, 1H), 4.40 – 4.07 (m, 2H), 3.52 – 3.22 (m, 1H), 3.14 – 2.95 (m, 1H), 2.43 (d, *J* = 3.1 Hz, 3H), 2.40 – 2.27 (m, 1H), 1.68 – 1.28 (m, 9H), 1.02 – 0.61 (m, 9H). <sup>13</sup>C NMR (100 MHz, CDCl<sub>3</sub>) δ 170.47, 170.09, 168.56, 168.35, 152.26, 151.69, 144.52, 144.46, 135.31, 135.11, 129.75, 129.66, 127.98, 127.91, 89.34, 89.28, 62.49, 62.38, 52.20, 51.68, 46.40, 46.31, 43.99, 43.70, 29.70, 28.48, 28.40, 28.19, 24.58, 24.29, 22.70, 21.59, 14.12, 14.05, 13.99, 11.51, 11.27, 7.78, 7.74, 7.55, 7.24. HPLC(CHIRAL-AD-H, 254 nm, hexane: *i*-PrOH =80:20, 1.0mL/min, *t*<sub>R1</sub>(minor) = 26.804 min, *t*<sub>R1</sub>(major) =32.155min, *t*<sub>R2</sub>(minor) =73.729 min, *t*<sub>R2</sub>(major) =113.252 min ). *dr* = 2.2:1. 93 %/79 % ee. ES-HRMS: Calcd for C<sub>22</sub>H<sub>32</sub>N<sub>2</sub>NaO<sub>7</sub>S [M+Na], 475.1879, Found 475.1769.

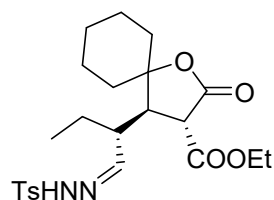

**(3S,4R)-ethyl-2-oxo-4-((R,E)-1-(2-tosylhydrazono)butan-2-yl)-1-oxaspiro[4.5]decane-3-carboxylate 3an.** Obtained in 65% yield, white oil. <sup>1</sup>H NMR (400 MHz, CDCl<sub>3</sub>) δ 8.18 – 7.90 (m, 1H), 7.81 (dd, *J* = 16.3, 8.2 Hz, 2H), 7.36 – 7.28 (m, 2H), 6.83 (t, *J* = 8.3 Hz, 1H), 4.39 – 4.06 (m, 2H), 3.43 (d, *J* = 12.0 Hz, 1H), 2.67 (dd, *J* = 21.7, 11.0 Hz, 1H), 2.41 (s, 3H), 2.40 – 2.22 (m, 1H), 1.80 – 1.14 (m, 13H), 0.91 – 0.80 (m, 2H), 0.65 (t, *J* = 7.2 Hz, 3H). <sup>13</sup>C NMR (100 MHz, CDCl<sub>3</sub>) δ 170.2, 170.0, 168.5, 168.4, 152.1, 151.9, 144.5, 144.4, 135.3, 135.2, 129.7, 128.0, 127.9, 87.4, 87.1, 62.5, 62.4, 51.8, 51.6, 51.4, 50.9, 44.0, 43.7, 37.5, 37.0, 31.7, 31.7, 29.7, 25.0, 24.9, 24.5, 24.2, 22.6, 22.6, 21.6, 21.4, 21.3, 14.0, 14.0, 11.4, 11.2. HPLC(CHIRAL-AD-H, 229 nm, hexane: *i*-PrOH =70:30, 1.0mL/min, *t*<sub>R1</sub>(minor) = 6.784 min, *t*<sub>R1</sub>(major) = 8.562 min, *t*<sub>R2</sub>(minor) = 9.910 min, *t*<sub>R2</sub>(major) = 12.682 min ). *dr* = 2.6:1. 87 %/48 % ee. ES-HRMS: Calcd for C<sub>23</sub>H<sub>33</sub>N<sub>2</sub>O<sub>6</sub>S [M+H], 465.2059, Found 465.2036.

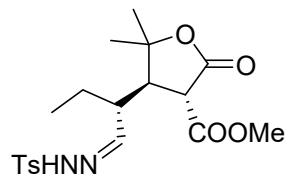

**(3S,4R)-methyl-5,5-dimethyl-2-oxo-4-((R,E)-1-(2-tosylhydrazono)butan-2-yl)tetrahydrofuran-3-carboxylate 3ao.** Obtained in 80% yield, white solid. <sup>1</sup>H NMR (400 MHz, CDCl<sub>3</sub>) δ 8.09 (s, 1H), 7.79 (d, *J* = 8.3 Hz, 2H), 7.42 – 7.15 (m, 2H), 6.81 (d, *J* = 8.1 Hz, 1H), 3.70 (s, 3H), 3.44 (d, *J* = 12.3 Hz, 1H), 2.79 (dd, *J* = 12.2, 9.3 Hz, 1H), 2.42 (s, 3H), 2.30 (ddd, *J* = 12.9, 10.2, 3.9 Hz, 1H), 1.53 (s, 3H), 1.32 – 1.20 (m, 5H), 0.66 (t, *J* = 7.4 Hz, 3H). <sup>13</sup>C NMR (100 MHz, CDCl<sub>3</sub>) δ 169.5, 168.5, 152.0, 144.5, 135.2, 129.7, 127.8, 85.5, 53.3, 51.7, 50.9, 44.7, 29.1, 24.3, 22.7, 21.6, 11.4. HPLC(CHIRAL-OD-H, 254nm, hexane: *i*-PrOH =90:10, 2.0mL/min, *t*<sub>R1</sub>(major) = 9.691 min, *t*<sub>R1</sub>(minor) = 14.033 min, *t*<sub>R2</sub>(minor) =

18.038 min,  $t_{R2}$ (major) = 24.733 min ).  $dr > 20:1$ . 99%/35% ee. ES-HRMS: Calcd for  $C_{19}H_{26}N_2NaO_6S$  [M+Na], 433.1409, Found 433.1403.

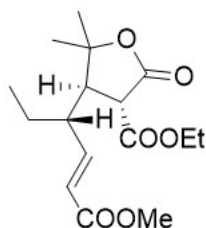

To a round-bottom flask, (*S*)-2-(2,5-dioxo-1-phenylpyrrolidin-3-yl)-2-methylpropanal (81 mg, 0.33 mmol) was dissolved in dichloromethane (10 mL). After the addition of methyl 2-(triphenylphosphoranylidene)acetate (121 mg, 0.36 mmol), the reaction mixture was stirred for 48 h at 50 °C in a pressure vessel. The solvent was evaporated and the crude product was purified using flash column chromatography eluting with petroleum ether (40-60 °C)/ethyl acetate (7:3) to afford the desired product.

**(3*S*,4*R*)-ethyl-4-((*S*,*E*)-6-methoxy-6-oxohex-4-en-3-yl)-5,5-dimethyl-2-oxotetrahydrofuran-3-carboxylate 5.** Obtained in 83% yield, white oil.  $^1\text{H NMR}$  (400 MHz,  $\text{CDCl}_3$ )  $\delta$  6.64 (dd,  $J = 15.7, 10.4$  Hz, 1H, minor isomer), 6.54 (dd,  $J = 15.6, 10.4$  Hz, 1H, major isomer), 5.86 (d,  $J = 15.6$  Hz, 1H, major isomer), 5.85 (d,  $J = 15.7$  Hz, 1H, minor isomer), 4.35 – 4.08 (m, 2H, major isomer+ minor isomer), 3.77 (s, 3H, minor isomer), 3.73 (s, 3H, major isomer), 3.47 (d,  $J = 12.0$  Hz, 1H, minor isomer), 3.34 (d,  $J = 12.2$  Hz, 1H, major isomer), 2.86 (ddd,  $J = 12.2, 10.1, 7.6$  Hz, 1H, major isomer+ minor isomer), 2.27 – 2.12 (m, 1H, major isomer+ minor isomer), 1.38 – 1.22 (m, 1H, major isomer+ minor isomer), 0.86 (t,  $J = 7.4$  Hz, 3H, major isomer), 0.81 (t,  $J = 7.4$  Hz, 3H, minor isomer).  $^{13}\text{C NMR}$  (100 MHz,  $\text{CDCl}_3$ )  $\delta$  170.1, 169.9, 168.3, 167.7, 166.0, 165.9, 149.2, 148.0, 123.4, 123.3, 85.9, 85.7, 62.4, 62.3, 53.0, 52.9, 52.6, 51.8, 51.8, 51.6, 45.6, 45.2, 29.3, 28.4, 25.6, 25.4, 22.9, 22.8, 14.0, 13.9, 11.7, 11.5. ES-HRMS: Calcd for  $C_{16}H_{25}O_6$  [M+H], 313.1651, Found 313.1617.

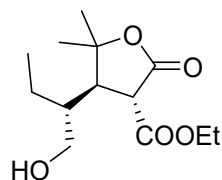

To a stirring solution of the Michael addition product **4aa** (1 mmol) was added  $\text{NaBH}_4$  (2 mmol). The solution was stirred for 4 h at room temperature, quenched with HCl (1 mL, 1 M). The reaction mixture was extracted with EtOAc (3 x 15 mL). The combined organic layers were dried over  $\text{MgSO}_4$  and the solvents were evaporated in vacuo. The crude product was purified using flash column chromatography eluting with petroleum ether (40-60 °C)/ethyl acetate (1:1) to afford the desired product.

**(3*S*,4*R*)-ethyl-4-((*R*)-1-hydroxybutan-2-yl)-5,5-dimethyl-2-oxotetrahydrofuran-3-carboxylate 6.** Obtained in 73% yield, white oil.  $^1\text{H NMR}$  (400 MHz,  $\text{CDCl}_3$ )  $\delta$  4.30 (q,  $J = 7.1$  Hz, 2H), 3.73 – 3.66 (m, 1H), 3.61 (d,  $J = 12.1$  Hz, 1H), 3.47 (d,  $J = 11.8$  Hz, 1H), 2.84 (dd,  $J = 12.1, 9.2$  Hz, 1H), 1.79 (dd,  $J = 6.8, 4.5$  Hz, 1H), 1.60 (s, 3H), 1.53 – 1.46 (m, 2H), 1.34 (m, 6H), 0.96 (t,  $J = 7.1$  Hz, 3H).  $^{13}\text{C NMR}$  (100 MHz,  $\text{CDCl}_3$ )  $\delta$  170.3, 169.3, 86.2, 62.5, 61.8, 52.5, 49.5, 42.2, 29.3, 22.8, 22.2, 14.0, 11.0. ES-HRMS: Calcd for  $C_{13}H_{23}O_5$  [M+H], 259.1545, Found 259.1516.



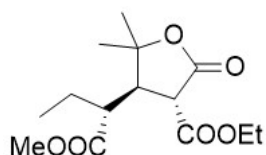

A solution of the Michael addition product **4aa** (1 mmol) in  $\text{CH}_2\text{Cl}_2$  was stirred at room temperature for 2 days and the crude acid was obtained. Then, to a stirring solution of the crude acid in MeOH (4 mL) and EtOH (4 mL) was added a solution of trimethylsilyldiazomethane (2.0 M in diethyl ether) dropwise until the yellow colour persisted. The reaction mixture was stirred for 1.5 h at room temperature. Then, it was quenched with dropwise addition of glacial acetic acid until the yellow colour disappeared. The reaction mixture was diluted with a solution of saturated aq.  $\text{NaHCO}_3$  (15 mL) and extracted with EtOAc (3 x 15 mL). The combined organic layers were dried over  $\text{MgSO}_4$  and the solvents were evaporated in vacuo. The crude product was purified using flash column chromatography eluting with petroleum ether (40-60 °C)/ethyl acetate (3:2) to afford the desired product.

**(3*S*,4*R*)-ethyl-4-((*R*)-1-methoxy-1-oxobutan-2-yl)-5,5-dimethyl-2-oxotetrahydrofuran-3-carboxylate **7**.** Obtained in 95% yield. white oil.  $^1\text{H NMR}$  (400 MHz,  $\text{CDCl}_3$ )  $\delta$  4.35 – 4.18 (m, 2H), 3.85 (d,  $J = 11.6$  Hz, 1H), 3.67 (s, 3H), 2.95 (dd,  $J = 11.6, 7.5$  Hz, 1H), 2.46 (ddd,  $J = 10.2, 7.5, 4.9$  Hz, 1H), 1.71 – 1.59 (m, 2H), 1.57 (s, 3H), 1.36 – 1.29 (m, 6H), 0.92 (t,  $J = 7.3$  Hz, 3H).  $^{13}\text{C NMR}$  (100 MHz,  $\text{CDCl}_3$ )  $\delta$  173.9, 170.3, 167.9, 85.5, 62.2, 51.8, 51.4, 50.6, 46.9, 28.7, 25.2, 22.7, 14.0, 11.9. ES-HRMS: Calcd for  $\text{C}_{14}\text{H}_{23}\text{O}_6$   $[\text{M}+\text{H}]$ , 287.1495, Found 287.1457.

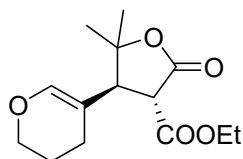

The Michael addition product **8** (304mg, 1mmol) was dissolved in 3ml DMF, and NaH(64.8mg 2.7mmol) was added to the solution under  $\text{N}_2$  atmosphere, This mixture was stirred for 8 h and then  $\text{NH}_4\text{Cl}$ (sat.) was added. The mixture was extracted (EtOAc), dried( $\text{Na}_2\text{SO}_4$ ), concentrated in Vacuo, and then chromatographed (8/1 Petroleum ether/EtOAc) to give (190 mg, 71%) of **8**.

**ethyl (3*S*,4*S*)-4-(3,4-dihydro-2H-pyran-5-yl)-5,5-dimethyl-2-oxotetrahydrofuran-3-carboxylate **8**,** Obtained in 71% yield. white oil.  $^1\text{H NMR}$  (400 MHz,  $\text{CDCl}_3$ )  $\delta$  6.38 (s, 1H), 4.28 (td,  $J = 14.1, 6.8$  Hz, 3H), 4.06 – 3.96 (m, 1H), 3.91 (ddd,  $J = 10.9, 7.0, 4.0$  Hz, 1H), 3.73 (d,  $J = 13.0$  Hz, 1H), 3.18 (d,  $J = 13.0$  Hz, 1H), 2.13 – 1.94 (m, 2H), 1.92 – 1.81 (m, 2H), 1.53 (s, 3H), 1.31 (t,  $J = 7.1$  Hz, 3H), 1.27 (s, 3H).  $^{13}\text{C NMR}$  (100 MHz,  $\text{CDCl}_3$ )  $\delta$  170.5, 167.6, 143.0, 105.5, 86.5, 65.6, 62.1, 53.4, 49.3, 27.6, 23.1, 22.6, 21.9, 14.1. ES-HRMS: Calcd for  $\text{C}_{14}\text{H}_{21}\text{O}_5$   $[\text{M}+\text{H}]$ , 269.1389, Found 269.1832.

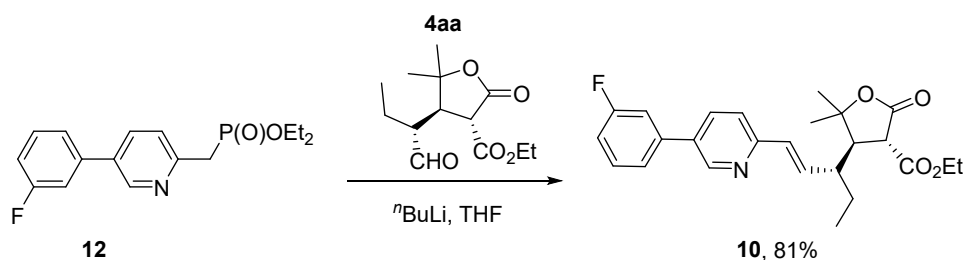

Phosphonate **12** (380 mg, 1mmol) was dissolved in THF (4.0 mL) and cooled to 0 °C. *n*-BuLi (0.6mL of 2.5 M solution in hexanes, 1mmol) was added and the mixture stirred for 10 min. This solution was then added to a solution of aldehyde **4aa** (128.0 mg, 0.5mmol) in THF (4.0 mL) at 0 °C. This mixture was stirred for 2 h and then NH<sub>4</sub>Cl (sat.) was added. The mixture was extracted (EtOAc), dried (Na<sub>2</sub>SO<sub>4</sub>), concentrated in Vacuo, and then chromatographed (8/1)Petroleum ether/EtOAc) to the title compound **10**.(172.0mg, 81% ).

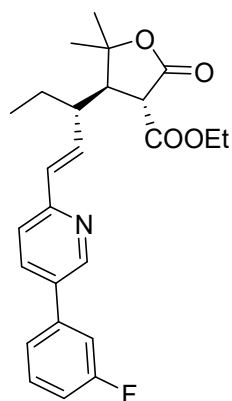

**ethyl (3S,4R)-4-((S,E)-1-(5-(3-fluorophenyl)pyridin-2-yl)pent-1-en-3-yl)-5,5-dimethyl-2-oxotetrahydrofuran-3-carboxylate 10**, Obtained in 81% yield. white oil. <sup>1</sup>H NMR (500 MHz, Chloroform-*d*) δ 8.76 (d, *J* = 2.1 Hz, 1H), 7.82 (dd, *J* = 8.2, 2.4 Hz, 1H), 7.45 (td, *J* = 7.9, 6.0 Hz, 1H), 7.35 (dd, *J* = 10.6, 8.2 Hz, 2H), 7.30 – 7.27 (m, 1H), 7.10 (td, *J* = 8.3, 2.2 Hz, 1H), 6.56 (d, *J* = 15.6 Hz, 1H), 6.36 (dd, *J* = 15.6, 10.0 Hz, 1H), 4.00 (dq, *J* = 10.7, 7.1 Hz, 1H), 3.75 (dq, *J* = 10.7, 7.2 Hz, 1H), 3.46 (d, *J* = 12.2 Hz, 1H), 2.92 (dd, *J* = 12.2, 9.9 Hz, 1H), 2.36 – 2.20 (m, 1H), 1.71 (ddt, *J* = 14.8, 7.5, 3.7 Hz, 1H), 1.65 (s, 3H), 1.49 – 1.42 (m, 1H), 1.40 (s, 3H), 0.93 (t, *J* = 7.2 Hz, 6H). <sup>13</sup>C NMR (125 MHz, CDCl<sub>3</sub>) δ 170.3, 168.0, 163.3 (d, *J* = 247.1 Hz), 154.2, 147.8, 139.8, 135.7, 134.7, 133.8, 131.8, 130.7 (d, *J* = 8.2 Hz), 122.5 (d, *J* = 3.2 Hz), 120.9, 115.0 (d, *J* = 20.9 Hz), 113.80 (d, *J* = 22.3 Hz), 85.9, 62.0, 53.4, 52.7, 46.6, 29.4, 26.0, 22.9, 13.6, 12.0. ES-HRMS: Calcd for C<sub>25</sub>H<sub>29</sub>FN<sub>2</sub>O<sub>4</sub> [M+H], 426.2081, Found 426.2012.

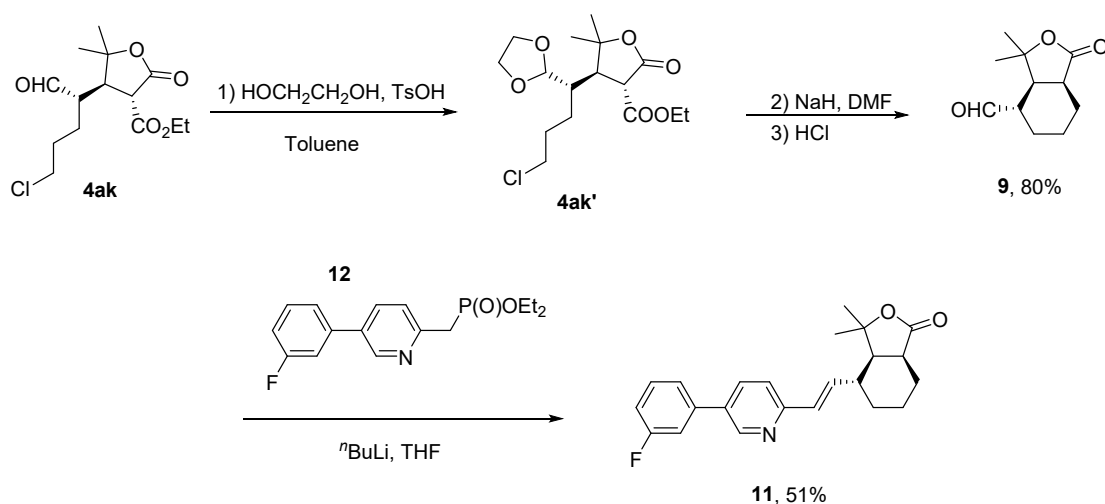

Aldehyde **4ak** (304 mg), ethylene glycol(186mg, 3 mmol) and *p*-toluenesulfonic acid (36 mg, 0.15 mmol) in toluene (15 mL) were heated at reflux for 12 hours. The reaction was cooled to RT and quenched with saturated aqueous sodium bicarbonate solution (20 mL). The resulting mixture was extracted with EtOAc (2 x 50 mL). The combined organic extracts were washed with saturated aqueous sodium bicarbonate solution (50 mL), water (50 mL), brine (100 mL), dried (Na<sub>2</sub>SO<sub>4</sub>), The residue was distilled under reduced pressure, and then purified by Flash Chromatography (8/1 Petroleum ether/EtOAc) to prepare 313mg(89.9%) of **4ak'** which is a protection product of aldehyde **4ak**.

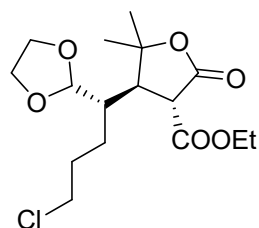

**ethyl (3S,4R)-4-((S)-4-chloro-1-(1,3-dioxolan-2-yl)butyl)-5,5-dimethyl-2-oxotetrahydrofuran-3-carboxylate **4ak'****. Obtained in 90% yield. white oil. <sup>1</sup>H NMR (400 MHz, Chloroform-*d*) δ 4.65 (d, *J* = 4.5 Hz, 1H), 4.19 (q, *J* = 7.2 Hz, 2H), 3.97 – 3.65 (m, 5H), 3.57 – 3.41 (m, 2H), 2.82 (dd, *J* = 11.8, 7.3 Hz, 1H), 1.93 – 1.70 (m, 3H), 1.69 – 1.53 (m, 2H), 1.52 (s, 3H), 1.29 (s, 3H), 1.26 (t, *J* = 7.1 Hz, 3H). <sup>13</sup>C NMR (100 MHz, CDCl<sub>3</sub>) δ 170.9, 168.2, 104.5, 86.0, 64.6, 64.5, 61.8, 51.5, 48.4, 45.1, 40.1, 29.6, 28.9, 26.6, 23.3, 14.2. ES-HRMS: Calcd for C<sub>16</sub>H<sub>26</sub>ClO<sub>6</sub> [M+H], 349.1418, Found 349.1407.

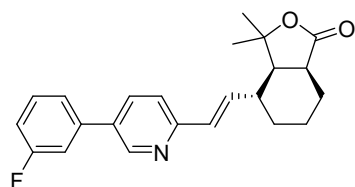

Step 1: Compound **4ak'**(313mg 0.90mmol) was desolved in 3mL dry DMF, and add the solution to the sealing tube, added NaH(64.8mg 2.7mmol) was added to the solution under N<sub>2</sub> atmosphere. The mixture was stirred for 8 h and then HCl(1.5 M)(sat.) was added. The mixture was extracted with EtOAc(2x100mL), dried over anhydrous Na<sub>2</sub>SO<sub>4</sub>, concentrated in vacuo. 10mL Ethyl acetate was added to the resulted product, and followed by 2 drops HCl (12 M). the resulting mixture was stirred for 4 h at room temperature. and then NaHCO<sub>3</sub>(sat.) was added. The mixture was extracted (EtOAc), dried(Na<sub>2</sub>SO<sub>4</sub>), concentrated in Vacuo, and then chromatographed (8/1 Petroleum ether/EtOAc) to give (149.0mg) of **9** (compound **9** is un stable in atmosphere and was used directly for the next step).

Phosphonate **12** (380mg, 1mmol) was dissolved in THF (4.0 mL) and cooled to 0 °C. *n*-BuLi (0.6mL of 2.5 M solution in hexanes, 1mmol) was added and the mixture stirred for 10 min. This solution was then added to a solution of the resulting product from above step (149.0 mg, 0.56mmol) in THF (4.0 mL) at 0 °C. This mixture was stirred for 2 h and then NH<sub>4</sub>Cl (sat.) was added. The mixture was extracted (EtOAc), dried (Na<sub>2</sub>SO<sub>4</sub>), concentrated in Vacuo, and then chromatographed (8/1)Petroleum ether/EtOAc) to give 224.74mg(total yield 51% ) of **11**.

**(3aR,4R,7aS)-4-((E)-2-(5-(3-fluorophenyl)pyridin-2-yl)vinyl)-3,3-dimethylhexahydroisobenzofuran-1(3H)-one **11**** Obtained in 51% yield. white oil. <sup>1</sup>H NMR (400

MHz, Chloroform-*d*)  $\delta$  8.77 (d,  $J = 2.0$  Hz, 1H), 7.82 (dt,  $J = 8.1, 2.6$  Hz, 1H), 7.44 (td,  $J = 8.0, 6.0$  Hz, 1H), 7.39 – 7.24 (m, 4H), 7.14 – 7.06 (m, 1H), 6.59 (s, 1H), 2.41 – 2.16 (m, 3H), 2.06 – 1.95 (m, 1H), 1.91 – 1.83 (m, 1H), 1.75 (dd,  $J = 13.5, 10.8$  Hz, 1H), 1.43 (s, 3H), 1.35 (s, 3H), 1.34 – 1.22 (m, 3H).  $^{13}\text{C}$  NMR (100 MHz,  $\text{CDCl}_3$ )  $\delta$  176.1, 163.3 (d,  $J = 246.7$  Hz), 154.4, 148.0, 139.9, 137.0, 134.9, 133.8 (d,  $J = 1.7$  Hz), 130.7 (d,  $J = 8.4$  Hz), 129.7, 122.6 (d,  $J = 2.9$  Hz), 121.3, 114.9 (d,  $J = 21.1$  Hz), 113.8 (d,  $J = 22.5$  Hz), 85.8, 56.1, 43.7, 43.7, 32.9, 28.8, 25.3, 25.2, 20.6. ES-HRMS: Calcd for  $\text{C}_{23}\text{H}_{25}\text{FNO}_2$  [M+H], 266.1869, Found 366.1813.

### 3. Determination of the configuration of products 3

#### 3.1 Determination of the absolute configuration of products 3aa

Figure S1. X-ray structure of 3aa

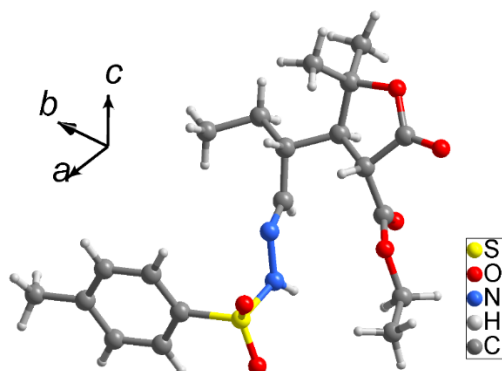

| Table S1 Crystal data and structure refinement for 3aa. |                                                                 |
|---------------------------------------------------------|-----------------------------------------------------------------|
| Identification code                                     | <b>3aa</b>                                                      |
| CCDC                                                    | 1970628                                                         |
| Empirical formula                                       | C <sub>20</sub> H <sub>28</sub> N <sub>2</sub> O <sub>6</sub> S |
| Formula weight                                          | 424.50                                                          |
| Temperature/K                                           | 296.15                                                          |
| Crystal system                                          | orthorhombic                                                    |
| Space group                                             | P2 <sub>1</sub> 2 <sub>1</sub> 2 <sub>1</sub>                   |
| a/Å                                                     | 8.1166(3)                                                       |
| b/Å                                                     | 13.9920(6)                                                      |
| c/Å                                                     | 19.8075(9)                                                      |
| α/°                                                     | 90                                                              |
| β/°                                                     | 90                                                              |
| γ/°                                                     | 90                                                              |
| Volume/Å <sup>3</sup>                                   | 2249.49(16)                                                     |
| Z                                                       | 4                                                               |
| ρ <sub>calc</sub> /cm <sup>3</sup>                      | 1.253                                                           |
| μ/mm <sup>-1</sup>                                      | 1.593                                                           |
| F(000)                                                  | 904.0                                                           |
| Radiation                                               | CuKα (λ = 1.54178)                                              |
| 2θ range for data collection/°                          | 7.736 to 133.144                                                |
| Index ranges                                            | -7 ≤ h ≤ 9, -16 ≤ k ≤ 16, -22 ≤ l ≤ 23                          |
| Reflections collected                                   | 10404                                                           |
| Independent reflections                                 | 3894 [R <sub>int</sub> = 0.1263, R <sub>sigma</sub> = 0.1278]   |
| Data/restraints/parameters                              | 3894/0/267                                                      |

|                                                |                                  |
|------------------------------------------------|----------------------------------|
| Goodness-of-fit on $F^2$                       | 0.990                            |
| Final R indexes [ $I \geq 2\sigma(I)$ ]        | $R_1 = 0.0927$ , $wR_2 = 0.2105$ |
| Final R indexes [all data]                     | $R_1 = 0.1173$ , $wR_2 = 0.2395$ |
| Largest diff. peak/hole / $e \text{ \AA}^{-3}$ | 0.60/-0.71                       |
| Flack parameter                                | 0.05(2)                          |

## 4. DFT calculations

### 4.1 Computational Information

To explain the high enantioselectivity and diastereoselectivity, DFT<sup>1</sup> studies have been performed with the Gaussian09 program<sup>2</sup> using the M06<sup>3</sup> method. The 6-31+G\*\* basis set was considered for the system. Ultrafine integral grid was used to get more accurate results. The structures were optimized with SMD<sup>4</sup> method in toluene ( $\epsilon=2.3741$ ). Harmonic vibrational frequency calculations show that all structures were shown to be stationary points (with no imaginary frequency) or transition states (with one imaginary frequency). The 3D molecular figures were prepared using CYLView.<sup>5</sup>

In a reaction, the translational and rotational entropy loss in the transition states will be overestimated significantly for the unequal number of molecules between the reactant and the product. In this study, the entropic corrections were made to the calculated free energies based on “the theory of free volume”.<sup>6</sup> For 2-to-1 (or 1-to-2) reactions, a correction of -2.6 (or 2.6) kcal/mol was made.

HOMO of TS-CCAtt-2 and TS-CCAtt-3

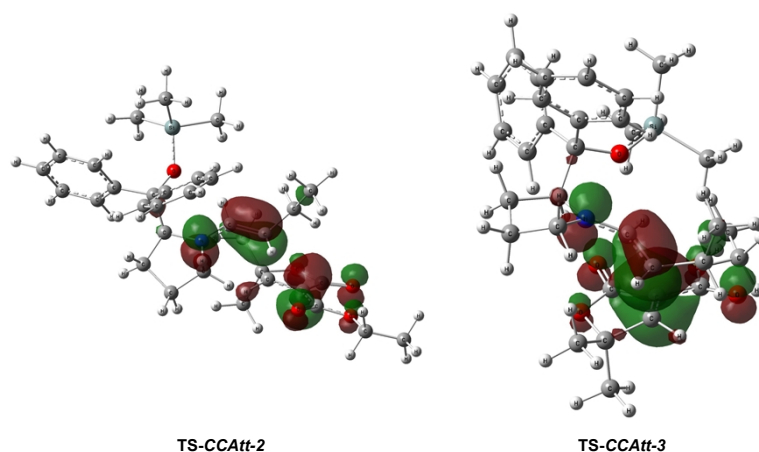

**Figure S2.** HOMO of TS-CCAtt-2 and TS-CCAtt-3. The contours are generated with a uniform value of 0.04. The selected bond lengths are in Å. Calculated at the M06/6-31+G\*\* level.

### 4.2. Calculated total energies and cartesian coordinates

#### INT1

##### *E-s-trans*

E(RM06)= -1353.21305068 Hartree

Sum of electronic and thermal Free Energies= -1352.760642 Hartree

N,0,1.9809485888,0.0832243295,1.0098393731  
C,0,2.6009524305,-1.0950563544,0.6776211574  
C,0,3.9221479553,-1.2889565866,0.4919023795  
C,0,0.564297049,0.1784454027,1.331719614  
C,0,0.5134585999,1.3656988894,2.3040776884  
C,0,1.7405508706,2.2169161707,1.9729055547  
C,0,2.7689609102,1.2063877873,1.4857300963  
C,0,-0.3391165525,0.3054468511,0.0596001481  
C,0,-1.8323624394,0.3236325769,0.3926337103  
C,0,0.0873535497,1.5355953938,-0.7349295063  
O,0,-0.0720616999,-0.8259430186,-0.7578184565  
Si,0,-0.6387769759,-2.3996446876,-0.8247966748

C,0,-2.3591563454,-2.5476356236,-1.5523435398  
C,0,0.5840386343,-3.2243128248,-1.9731822537  
C,0,-0.6611700362,-3.2676975716,0.8415561621  
C,0,-2.739725815,0.6066340342,-0.6364018671  
C,0,-4.111454416,0.5668658119,-0.4217407403  
C,0,-4.6129513959,0.2289543551,0.8343070277  
C,0,-3.7268443662,-0.0667887696,1.8639095191  
C,0,-2.3499472036,-0.0173954934,1.6446644445  
C,0,1.1700970159,1.4420334786,-1.6149686867  
C,0,1.6445042786,2.5688322436,-2.28068641  
C,0,1.0428972981,3.8094852425,-2.0823157319  
C,0,-0.0415708813,3.9121667869,-1.2154747487  
C,0,-0.5122485888,2.7842946728,-0.5474815607  
H,0,1.9217472889,-1.938928154,0.5555602285  
H,0,4.6181482623,-0.4525574395,0.5857313507  
H,0,0.2517441832,-0.75240077,1.8311788797  
H,0,0.589058303,0.9803228599,3.329700756  
H,0,-0.4197762135,1.9353558559,2.2404750284  
H,0,1.5096277368,2.9387126342,1.1807809592  
H,0,2.0981311096,2.7828254726,2.8392727853  
H,0,3.4405583814,0.8683775729,2.2961792386  
H,0,3.4064670788,1.6096927772,0.6831799517  
H,0,-2.4703247127,-1.9670667345,-2.4764639816  
H,0,-2.5406119212,-3.6032395053,-1.801241891  
H,0,-3.1439992098,-2.2348844168,-0.8525188371  
H,0,0.3519915927,-4.2902819326,-2.0977174379  
H,0,1.6130311108,-3.1414190188,-1.5997593215  
H,0,0.557430914,-2.7572092886,-2.9658147028  
H,0,0.3163216772,-3.3035142859,1.3384701969  
H,0,-1.386278581,-2.8197745725,1.5334336539  
H,0,-0.9787227684,-4.3076988955,0.6773448513  
H,0,-2.3591681493,0.8567169792,-1.6257132108  
H,0,-4.7915897609,0.7934272001,-1.24011172  
H,0,-5.6862977791,0.1957777597,1.0071678893  
H,0,-4.1027261315,-0.3338804719,2.8492842316  
H,0,-1.6883214696,-0.2502954758,2.4759066204  
H,0,1.6398685602,0.4747783812,-1.7759317006  
H,0,2.4887463304,2.47387406,-2.9605359011  
H,0,1.4121301817,4.6887262647,-2.6058481053  
H,0,-0.5275649903,4.8727020283,-1.0576355272  
H,0,-1.3611644213,2.8856406564,0.1264265179  
C,0,4.5115577754,-2.6265610915,0.1639697649  
H,0,3.7032015053,-3.3679767917,0.0697288904  
H,0,5.0108007401,-2.5958352548,-0.8181453953



C,0,5.5186301012,-3.1015497202,1.2066423338  
H,0,5.9661616692,-4.0651865491,0.9321282325  
H,0,6.3362949557,-2.377673365,1.3218448621  
H,0,5.0420052856,-3.2146622251,2.1887758603

-----

***E-s-cis***

E(RM06)= -1353.20859880 Hartree

Sum of electronic and thermal Free Energies= -1352.755180 Hartree

C,0,-1.168933906,2.7513998873,-2.5082586909  
C,0,-0.1579861565,1.6128334254,-2.4050276518  
C,0,-0.6978035929,0.6971471716,-1.2873292408  
C,0,-1.6510913676,2.8789083573,-1.0722123169  
H,0,-0.7330076815,3.6737311845,-2.90792248  
H,0,-2.0111989667,2.4624725822,-3.1516218373  
H,0,0.826586349,2.0142258078,-2.1352498132  
H,0,-0.0302153065,1.0677123919,-3.3457715919  
H,0,-1.1968072182,-0.1899248333,-1.7091319706  
H,0,-2.6279095152,3.3641016188,-0.9707416474  
H,0,-0.9290389576,3.4507390744,-0.4652763268  
N,0,-1.723100393,1.4950808498,-0.6154147479  
C,0,0.4035987135,0.1556373376,-0.3119335014  
C,0,0.8442690723,1.3053441773,0.5936334473  
C,0,1.8560556134,2.2066436724,0.2453028872  
C,0,0.1287097402,1.5478344655,1.7711946325  
C,0,2.1555369485,3.3019135286,1.0540598137  
H,0,2.4346562457,2.0577277719,-0.6639355918  
C,0,0.4242071066,2.6392367178,2.5813530553  
H,0,-0.6793623756,0.8730105913,2.0448795382  
C,0,1.4417074022,3.5227087662,2.227337613  
H,0,2.9536873554,3.9812889737,0.7624494062  
H,0,-0.1494655137,2.802373791,3.4913474931  
H,0,1.6755785871,4.3750665683,2.8613799766  
C,0,1.5405460452,-0.5338196657,-1.0740245078  
C,0,2.845404417,-0.5796554174,-0.5726306744  
C,0,1.2614255675,-1.2782891271,-2.2267718578  
C,0,3.8417349144,-1.312874787,-1.2140052671  
H,0,3.0955569588,-0.0409492407,0.3384448368  
C,0,2.2533209883,-2.0071216102,-2.8747927789  
H,0,0.2503096032,-1.3085388848,-2.6265240479  
C,0,3.552590549,-2.0242541132,-2.3738227686  
H,0,4.8476429442,-1.3259750217,-0.79970878  
H,0,2.0054625334,-2.5700349639,-3.7721335975  
H,0,4.329632048,-2.5932571956,-2.8791803331  
Si,0,0.2436800855,-2.0621548634,1.4787362005

O,0,-0.2587262157,-0.8347809272,0.4562530391  
C,0,1.4987501591,-1.5125883096,2.7589489122  
H,0,1.1191277114,-0.7017405701,3.392773902  
H,0,1.7267180903,-2.3666486633,3.4128836799  
H,0,2.4463969177,-1.1800602124,2.3175243735  
C,0,0.9285549187,-3.5256864426,0.5316305567  
H,0,1.9206932309,-3.3293564131,0.1061247463  
H,0,1.0241650595,-4.3842129391,1.2114325004  
H,0,0.259599084,-3.8229539992,-0.2861358428  
C,0,-1.3463518664,-2.5567872961,2.3326627268  
H,0,-2.0657303323,-2.9930352032,1.626974599  
H,0,-1.1512910798,-3.304090146,3.1134790087  
H,0,-1.8248671543,-1.6899697002,2.8073449307  
C,0,-2.9441077781,0.9702287566,-0.2300789397  
H,0,-3.7120498199,1.7389447325,-0.1053865254  
C,0,-3.2735147252,-0.3098787223,0.0197768416  
H,0,-2.5083149909,-1.0840319848,-0.0349976969  
C,0,-4.6515862598,-0.7342264409,0.4252144229  
H,0,-4.6389131237,-1.1285449802,1.4554630756  
H,0,-5.3200436073,0.1399291604,0.4442529819  
C,0,-5.2295467447,-1.808110981,-0.4898139306  
H,0,-6.2227137186,-2.1363031628,-0.1585282133  
H,0,-5.3172508272,-1.4423418299,-1.5209747378  
H,0,-4.5780527649,-2.6925197136,-0.5112962896

-----

**Z-s-trans**

E(RM06)= -1353.20887343 Hartree

Sum of electronic and thermal Free Energies= -1352.755884 Hartree

C,0,1.893498589,-2.712942715,-1.7466517308  
C,0,0.4359798147,-2.395343969,-1.4270082581  
C,0,0.3912965274,-0.8670729626,-1.3089668292  
C,0,2.6459939274,-1.6405515614,-0.9718618684  
H,0,2.180134529,-3.7319689213,-1.4643516416  
H,0,2.0866815078,-2.5886666536,-2.8206783278  
H,0,0.1580307566,-2.8640947932,-0.4752148358  
H,0,-0.2622567536,-2.7667359537,-2.1840426108  
H,0,0.0407601995,-0.4066897417,-2.2479216959  
H,0,3.6331895763,-1.416523633,-1.3931255498  
H,0,2.7840658981,-1.9355626332,0.0840101181  
N,0,1.7790066526,-0.4773355026,-1.1010524696  
C,0,-0.5524178879,-0.3029121398,-0.1917448073  
C,0,0.0602504991,-0.6367909759,1.1675021554  
C,0,-0.1747994669,-1.8484375277,1.8278424865  
C,0,0.9954530196,0.2405767685,1.7253971272

C,0,0.4939990878,-2.1668302486,3.0084783814  
H,0,-0.8967236396,-2.5587672688,1.4293760991  
C,0,1.6646710614,-0.0726286518,2.9042731783  
H,0,1.210982383,1.1779128062,1.2175974588  
C,0,1.4183981244,-1.2804039122,3.5525072454  
H,0,0.2863204953,-3.1131382442,3.5036027365  
H,0,2.3900102102,0.6298076784,3.3104414272  
H,0,1.9412420718,-1.5273333147,4.4738909586  
C,0,-1.9987357633,-0.7742542057,-0.3699154007  
C,0,-2.8751803852,-0.8790251671,0.7157597071  
C,0,-2.5276424328,-0.9701038455,-1.651439865  
C,0,-4.220571469,-1.1898511631,0.5326979296  
H,0,-2.5074817069,-0.7126289665,1.7260264667  
C,0,-3.8692282545,-1.2869122074,-1.8400388385  
H,0,-1.8943025913,-0.8614117134,-2.5287256512  
C,0,-4.7239679637,-1.4014952024,-0.7470783605  
H,0,-4.8757601845,-1.2649442177,1.3979159519  
H,0,-4.2479904779,-1.4372442387,-2.8487263818  
H,0,-5.7733349753,-1.6478097308,-0.8922117414  
Si,0,-1.4212943719,2.405392542,0.1052875646  
O,0,-0.5138989684,1.0971768845,-0.4119130677  
C,0,-1.7233729586,2.4283908367,1.9553008948  
H,0,-0.7883330417,2.4909615144,2.5255524623  
H,0,-2.3237827567,3.3150181599,2.204037532  
H,0,-2.2769800668,1.5504224081,2.3099600205  
C,0,-3.0612066678,2.5001679797,-0.7942035537  
H,0,-3.7617210874,1.7179718944,-0.475482219  
H,0,-3.535091427,3.4715466893,-0.5948171252  
H,0,-2.9268974687,2.4140623133,-1.8800152352  
C,0,-0.3332484901,3.8482316597,-0.3737527253  
H,0,-0.164475884,3.8763591172,-1.4577762089  
H,0,-0.7840494024,4.8046628086,-0.0780773483  
H,0,0.6478755654,3.7716165601,0.1135753139  
C,0,2.2244541068,0.781641255,-1.447895653  
H,0,1.5009272388,1.3416466057,-2.0450981187  
C,0,3.3883610609,1.3809456022,-1.1258896884  
H,0,3.5521142722,2.3608053573,-1.5781203934  
C,0,4.4655350366,0.8958019408,-0.2025228433  
H,0,4.1374523358,0.0015302032,0.3433757826  
H,0,4.6365628445,1.6632911519,0.5697358082  
C,0,5.790480516,0.6206485228,-0.9078880944  
H,0,6.5779452013,0.3340106675,-0.1994620358  
H,0,5.6880779127,-0.186256709,-1.6460090877  
H,0,6.1373665219,1.5101287639,-1.4499845448

-----  
**Z-s-cis**

E(RM06)= -1353.20378157 Hartree

Sum of electronic and thermal Free Energies= -1352.750129 Hartree

N,0,1.7671682792,0.607709412,0.7606103232  
C,0,2.7611063811,-0.3302745757,0.5369544889  
C,0,2.854999617,-1.6604886421,0.7467705244  
C,0,0.45047028,0.3327147116,1.3221432005  
C,0,0.1874549311,1.5270413587,2.2433306575  
C,0,1.015803458,2.6698667747,1.6549204153  
C,0,2.233074564,1.9625089698,1.0822278911  
C,0,-0.6372098051,0.0803662032,0.2210833976  
C,0,-1.9619874893,-0.3959714779,0.8347081257  
C,0,-0.7839398595,1.3271377785,-0.6463054231  
O,0,-0.0984847728,-0.9718478286,-0.5528759927  
Si,0,-0.6512170154,-2.1190357599,-1.6328782516  
C,0,-1.6669109514,-1.4025234922,-3.0377394591  
C,0,0.9369963697,-2.8239027433,-2.323479521  
C,0,-1.626458409,-3.4690635852,-0.7747500318  
C,0,-3.148750936,-0.3082683381,0.095888718  
C,0,-4.3427826872,-0.8438601847,0.5685055539  
C,0,-4.3818593911,-1.486103076,1.8029311891  
C,0,-3.2130553084,-1.5872997903,2.549988109  
C,0,-2.019438954,-1.0533833345,2.069403002  
C,0,0.0952953607,1.5153868861,-1.7175175718  
C,0,0.0675591716,2.6864836861,-2.4699163866  
C,0,-0.8428795281,3.6955598406,-2.1654703854  
C,0,-1.7260859632,3.519733854,-1.1034902933  
C,0,-1.6927592812,2.3484369382,-0.3508764531  
H,0,3.647162235,0.146904565,0.1094241755  
H,0,3.8120571071,-2.0838128346,0.4385322313  
H,0,0.5057707211,-0.5938555721,1.8998337784  
H,0,0.5562876789,1.2782191592,3.2484129335  
H,0,-0.8766100317,1.7707732653,2.3419843382  
H,0,0.4618787067,3.1883198708,0.8641069437  
H,0,1.2928350121,3.4159398516,2.406989729  
H,0,3.0442713033,1.9142556069,1.8286060364  
H,0,2.6336248991,2.4607581884,0.1869981469  
H,0,-1.1437532882,-0.5823910749,-3.5454579677  
H,0,-1.8419763419,-2.1921246854,-3.7825659139  
H,0,-2.6492790834,-1.0333748725,-2.7200462593  
H,0,0.7334509173,-3.5526393981,-3.1195191186  
H,0,1.5209845284,-3.3274428263,-1.542427563  
H,0,1.5673775849,-2.0284453966,-2.7424841072

H,0,-1.0696665484,-3.8882251088,0.0737551107  
H,0,-2.5976447827,-3.1184537577,-0.4036070696  
H,0,-1.8165410882,-4.2888558276,-1.4817798111  
H,0,-3.1439794842,0.1884153409,-0.8719779991  
H,0,-5.2452949454,-0.7569630458,-0.0328664635  
H,0,-5.3131995383,-1.9043894896,2.1777771133  
H,0,-3.2227942617,-2.0880756085,3.515654249  
H,0,-1.1296278793,-1.1674975498,2.6844330986  
H,0,0.8137837064,0.7328828424,-1.9526277259  
H,0,0.7632117718,2.8103473113,-3.2975096312  
H,0,-0.8675753625,4.6099827873,-2.7542141612  
H,0,-2.4459887574,4.2970437872,-0.8558777067  
H,0,-2.3857298172,2.2376837903,0.481141711  
C,0,1.8918015764,-2.6247989501,1.3769277311  
H,0,0.8620116914,-2.3979957173,1.0725332478  
H,0,2.100840378,-3.6345649047,0.9928498591  
C,0,1.9819705832,-2.6616527474,2.9021856657  
H,0,1.2742020019,-3.3843607593,3.3300674128  
H,0,2.9903709998,-2.9397466872,3.23448059  
H,0,1.7650781571,-1.6754194972,3.3379533495

-----

**1a**

E(RM06)= -650.756842330 Hartree

Sum of electronic and thermal Free Energies= -650.596747 Hartree

C,0,-2.4911480761,-0.1193139439,0.024264466  
O,0,-1.9217561559,1.2076378901,-0.0447045918  
C,0,-0.173796596,-0.2756665188,-0.0277762769  
C,0,-1.2925078875,-1.0063450876,0.0263621438  
H,0,-1.3538277276,-2.0908336782,0.0673181136  
C,0,-0.5637809599,1.1600391822,-0.0699114308  
O,0,0.1098946738,2.1553080712,-0.1200122351  
C,0,-3.355310922,-0.334547166,-1.205915325  
H,0,-3.7870196636,-1.3418551579,-1.1952796371  
H,0,-4.1722748183,0.3950711638,-1.2161987007  
H,0,-2.7670496401,-0.2151228412,-2.1223484617  
C,0,-3.2873632998,-0.2281533512,1.3128928986  
H,0,-4.1017445817,0.5044724363,1.306203345  
H,0,-3.720101229,-1.2302764212,1.4102497351  
H,0,-2.6500919424,-0.0349505455,2.1828301818  
C,0,1.1856864834,-0.8600250043,-0.0445533324  
O,0,1.3817082356,-2.0581174784,-0.0904824792  
O,0,2.1415977699,0.0596363579,0.0009529384  
C,0,3.5005741749,-0.4259011649,-0.0145610706  
H,0,3.6276954699,-1.1340441649,0.8128509001

H,0,3.6612476393,-0.9749088166,-0.9506214497  
C,0,4.4050494252,0.7677592185,0.1105573188  
H,0,5.4508638565,0.442561708,0.0974486376  
H,0,4.2521611514,1.4673472658,-0.7177752425  
H,0,4.22396762,1.3029810468,1.0486765546

-----

## INT2

E(RM06)= -2003.98536542 Hartree

Sum of electronic and thermal Free Energies= -2003.345834 Hartree

C,0,0.5622421346,-0.4628219011,-2.9595715041  
C,0,-0.0694998895,0.7400377087,-2.2476832214  
C,0,-0.3054668112,0.3093779465,-0.7977906814  
C,0,1.1563912981,-1.329481249,-1.8479052566  
H,0,-0.189154845,-1.0291723682,-3.5203701242  
H,0,1.3283710539,-0.1425284528,-3.6731161905  
H,0,-0.9845200308,1.0829243138,-2.7425351956  
H,0,0.637175171,1.580661572,-2.2387455416  
H,0,-0.0747876116,1.1313559711,-0.1044979151  
H,0,2.2600350167,-1.3300009555,-1.8564532126  
H,0,0.8360513711,-2.3828584195,-1.9305913167  
N,0,0.689305474,-0.7347982556,-0.6082501541  
C,0,-1.7573759261,-0.1323128111,-0.4050645632  
C,0,-2.0869564442,-1.4567113243,-1.0855531636  
C,0,-2.54522341,-1.5035529176,-2.4062478299  
C,0,-1.8396039071,-2.6641076884,-0.4286209157  
C,0,-2.7501017336,-2.7202578142,-3.0509016217  
H,0,-2.7461075418,-0.5780099337,-2.9441358924  
C,0,-2.0443703996,-3.8835377196,-1.0690276137  
H,0,-1.4662888097,-2.6465810147,0.5929350375  
C,0,-2.4976014816,-3.9174208129,-2.3848240761  
H,0,-3.1084414061,-2.7305256566,-4.0781992984  
H,0,-1.8398941593,-4.809698471,-0.5354453739  
H,0,-2.6573262936,-4.8686359852,-2.8878866608  
C,0,-2.7930656588,0.9604839805,-0.6839229049  
C,0,-4.1488768749,0.6419666598,-0.8157777792  
C,0,-2.4408125872,2.3139558613,-0.6894846212  
C,0,-5.1151747862,1.6354695221,-0.9518099204  
H,0,-4.4593479721,-0.4011014346,-0.8154175229  
C,0,-3.4001983398,3.3119545608,-0.8320563873  
H,0,-1.3995079609,2.6082537124,-0.5907895351  
C,0,-4.7451487101,2.9773755862,-0.962325138  
H,0,-6.1617014319,1.3556757465,-1.0526922923  
H,0,-3.0915259257,4.3557167564,-0.843042951  
H,0,-5.4976241385,3.7547848285,-1.0731676106

Si,0,-2.6940116716,-0.3042119841,2.313084469  
O,0,-1.664115303,-0.3159800755,0.99697598  
C,0,-4.1128623559,-1.520037467,2.1533828843  
H,0,-3.7580559957,-2.5504495301,2.0256039113  
H,0,-4.7124267589,-1.4892191911,3.0742675183  
H,0,-4.7853146633,-1.2862869865,1.3186964164  
C,0,-3.3754625341,1.4026763218,2.6748153533  
H,0,-4.1144439539,1.7318616229,1.9337863849  
H,0,-3.8730829398,1.3902991152,3.6547835401  
H,0,-2.578348031,2.1559218958,2.7204313608  
C,0,-1.5544123841,-0.8392552293,3.6949017427  
H,0,-0.7062007838,-0.1491191652,3.79907804  
H,0,-2.0836433037,-0.8718966315,4.6564400365  
H,0,-1.1505848181,-1.8423765416,3.5017124082  
C,0,1.0783237366,-1.2275724562,0.6104008025  
H,0,0.7381548868,-0.6319124621,1.4588624548  
C,0,1.843526012,-2.3179950057,0.8265152098  
H,0,2.1432416327,-2.9533219683,-0.0108775513  
C,0,2.2599308394,-2.7572599341,2.1973932395  
H,0,1.9739290761,-1.9837695063,2.9275491904  
C,0,5.2162584242,-0.1240444561,-0.2868825979  
O,0,4.7068317243,0.5233210638,-1.4769209791  
C,0,3.3704929237,1.1728787947,0.2672016847  
C,0,4.2578623406,0.3073696092,0.7722641034  
H,0,4.3252671258,-0.018247718,1.8074884032  
C,0,3.6329098803,1.3042252869,-1.1877761714  
O,0,3.059998726,1.9386960854,-2.0373012038  
C,0,6.6128032121,0.4162231635,-0.0180472274  
H,0,7.0237131957,-0.0264169218,0.8966290451  
H,0,7.2736598907,0.1635174855,-0.8545918443  
H,0,6.5943399317,1.505699204,0.0977578063  
C,0,5.226452434,-1.6229294839,-0.5176891713  
H,0,5.8756614585,-1.861591358,-1.3675500063  
H,0,5.6131279277,-2.1365628742,0.3703677361  
H,0,4.2160158186,-1.9943240502,-0.7213111739  
C,0,2.328591656,1.8376894734,1.0730510218  
O,0,2.0825938166,1.5305491532,2.2225959638  
O,0,1.7156165472,2.8209306608,0.4141619217  
C,0,0.7023280234,3.5404637717,1.1434764013  
H,0,-0.1125135587,2.8422976877,1.3873196485  
H,0,1.1266719213,3.8893438568,2.0921810955  
C,0,0.2447266291,4.6771270254,0.2723072874  
H,0,-0.5847816407,5.2047559775,0.7563243313  
H,0,1.0554947696,5.3928754118,0.0997006314

H,0,-0.095313959,4.3170528414,-0.7065566732  
C,0,1.6564390553,-4.1002277146,2.5974226615  
H,0,1.9403908451,-4.8858782212,1.8844683775  
H,0,1.9880229911,-4.4193741602,3.5939173715  
H,0,0.5594130521,-4.0491748519,2.6034155895  
H,0,3.3588239399,-2.8393518057,2.2606609133

-----

**TS-CCAtt-endo**

E(RM06)= -2003.96930771 Hartree

Sum of electronic and thermal Free Energies= -2003.328367 Hartree

C,0,-0.8506107627,1.1749247052,2.3623922256  
C,0,0.3429862645,1.6958570898,1.5443578619  
C,0,0.5201504232,0.7469835626,0.351096154  
C,0,-1.1452126045,-0.2197789733,1.8222411617  
H,0,-0.63779793,1.1497989179,3.4362846721  
H,0,-1.7251024548,1.8181432925,2.2099856473  
H,0,1.2573138532,1.7487783162,2.1427870047  
H,0,0.1546056552,2.7153409647,1.1876273406  
H,0,0.4071549512,1.2639224702,-0.6114863908  
H,0,-2.2155422331,-0.4486380421,1.8079960294  
H,0,-0.6374657507,-1.013942208,2.3928409256  
N,0,-0.6120920645,-0.1796598857,0.4593395319  
C,0,1.8998725634,0.0052553542,0.2788891528  
C,0,1.9669274585,-1.0287998948,1.4044303341  
C,0,2.2689422288,-0.6793903464,2.726591377  
C,0,1.6025317217,-2.3535258316,1.1475833842  
C,0,2.2019629568,-1.6185349923,3.7524745218  
H,0,2.5679429518,0.3374708797,2.9717801423  
C,0,1.5331636166,-3.2961458925,2.1697937538  
H,0,1.3552277321,-2.6469564746,0.1302876987  
C,0,1.8297090977,-2.9322105258,3.4801379715  
H,0,2.4451018087,-1.3180334946,4.7692956344  
H,0,1.2416712877,-4.3184776569,1.9369044043  
H,0,1.776613267,-3.665899906,4.28122292  
C,0,3.0527907395,1.013480466,0.277121306  
C,0,4.2923504454,0.7186197294,0.852044033  
C,0,2.9272164483,2.220124899,-0.4225514703  
C,0,5.3631348837,1.6049408343,0.7509924812  
H,0,4.4327606916,-0.2179515823,1.387323103  
C,0,3.9901730908,3.1111141674,-0.5195911966  
H,0,1.9941235649,2.4708068701,-0.9231199478  
C,0,5.2148860232,2.8090468879,0.0708209507  
H,0,6.3156230036,1.3485670116,1.209725753  
H,0,3.8610432669,4.0425346376,-1.0664008243



H,0,6.0471278871,3.5051504062,-0.0038997259  
Si,0,3.0397738655,-1.2757790695,-2.0035667919  
O,0,1.8684842782,-0.6482123122,-0.9759131021  
C,0,4.2939419492,-2.3492684587,-1.1198055158  
H,0,3.8303686057,-3.1884225258,-0.5868957823  
H,0,4.9863423189,-2.7694161966,-1.86295786  
H,0,4.8976081408,-1.7825047016,-0.4000683988  
C,0,3.930875433,0.0665505159,-2.9528655592  
H,0,4.642341162,0.625049864,-2.3322239002  
H,0,4.4976638819,-0.3908888421,-3.7760020854  
H,0,3.2268720385,0.7832477821,-3.3941553204  
C,0,2.0075064095,-2.3067036907,-3.1723965573  
H,0,1.2824134313,-1.6839494978,-3.7120288641  
H,0,2.6375865289,-2.8064752358,-3.9198591663  
H,0,1.4488177638,-3.0837740844,-2.6332099135  
C,0,-0.9901968231,-0.980130391,-0.5380157291  
H,0,-0.4492779804,-0.8237893786,-1.4710303364  
C,0,-2.0760348965,-1.8386648579,-0.5117199418  
H,0,-2.4288490826,-2.1628531179,0.4677087842  
C,0,-2.2664570369,-2.8213852072,-1.6369154418  
H,0,-3.3191781373,-2.838172406,-1.9627321132  
H,0,-1.6943211866,-2.4803859808,-2.5134283943  
C,0,-4.9051196358,-0.7788195766,-0.1760425795  
O,0,-4.9775097535,0.1117324576,0.9579190964  
C,0,-3.3248835649,0.9189843011,-0.3953397345  
C,0,-3.6342095307,-0.3446823111,-0.8914635369  
H,0,-3.5159700374,-0.5916616328,-1.9445335633  
C,0,-4.1114277281,1.1659285849,0.8028585826  
O,0,-4.1049963398,2.0700173102,1.6105700778  
C,0,-6.0834379905,-0.4731445283,-1.099234743  
H,0,-6.0764544038,-1.1490399026,-1.9636588988  
H,0,-7.024961779,-0.6123237135,-0.5559056057  
H,0,-6.0404623021,0.5588937284,-1.4648039691  
C,0,-5.030151126,-2.1884737529,0.3661225722  
H,0,-6.0244478259,-2.3102586251,0.8106787484  
H,0,-4.924125104,-2.9349602712,-0.4293361658  
H,0,-4.2938479976,-2.392459791,1.1490413451  
C,0,-2.3666895201,1.7927465553,-1.0281690794  
O,0,-1.7333136401,1.4932191255,-2.0360630785  
O,0,-2.2282497895,2.986676223,-0.4179918784  
C,0,-1.3078941521,3.9057731585,-1.012860535  
H,0,-0.297600409,3.4682855828,-0.9982678269  
H,0,-1.5752619865,4.0612966261,-2.0658377201  
C,0,-1.3745261368,5.1830146727,-0.219560931

H,0,-0.670193694,5.9173011627,-0.6260294988  
H,0,-2.3813656533,5.6126625469,-0.2567400063  
H,0,-1.1223638169,5.0075955952,0.8328694306  
C,0,-1.8526670872,-4.2365203412,-1.2546500335  
H,0,-2.4357686535,-4.5948554745,-0.3951529164  
H,0,-2.0075080394,-4.9423796095,-2.0794888195  
H,0,-0.7935535132,-4.2780223293,-0.9677375389

-----

**TS-CCAtt-2**

E(RM06)= -2003.96080594 Hartree

Sum of electronic and thermal Free Energies= -2003.321629 Hartree

C,0,-0.2317995702,1.7100938623,-2.5377682586  
C,0,1.1665012263,1.0928620323,-2.4833946417  
C,0,1.1391567903,0.1131530926,-1.3010532924  
C,0,-0.6718160653,1.7021267912,-1.0849016201  
H,0,-0.2378329968,2.7113168546,-2.978982664  
H,0,-0.9116852742,1.07811363,-3.1261215866  
H,0,1.9126138018,1.8768900265,-2.3162317317  
H,0,1.4426774964,0.5881822246,-3.4142301397  
H,0,1.0683478873,-0.9280392767,-1.6456229649  
H,0,-1.7554593661,1.7444681347,-0.9449730771  
H,0,-0.2251984046,2.5344176107,-0.5164108557  
N,0,-0.1208683742,0.4311950033,-0.6090489828  
C,0,2.3763799391,0.1592690648,-0.3399632364  
C,0,2.3369329259,1.466962918,0.4533839686  
C,0,2.8253759299,2.6739790876,-0.0622418136  
C,0,1.6931929189,1.5005965336,1.6936987931  
C,0,2.6680470439,3.869691091,0.6345431335  
H,0,3.3532326389,2.6912411124,-1.0136290061  
C,0,1.5314231321,2.6931569141,2.3927667284  
H,0,1.3059724682,0.5763829579,2.1158675589  
C,0,2.0150956348,3.8862624876,1.8636085653  
H,0,3.0622454528,4.7910930559,0.2116608122  
H,0,1.0208303703,2.6864564698,3.3535236565  
H,0,1.8900010904,4.8199595354,2.406907629  
C,0,3.6820146712,-0.075829524,-1.1045040748  
C,0,4.8927517197,0.467523814,-0.663178787  
C,0,3.7203621772,-0.9621649624,-2.1875197313  
C,0,6.0951311526,0.1575472667,-1.2943653339  
H,0,4.9044675163,1.1426483526,0.1895121013  
C,0,4.9176611648,-1.2698499621,-2.8255523387  
H,0,2.8095836289,-1.4414096044,-2.5398635208  
C,0,6.1122265109,-0.7069719278,-2.3841067578  
H,0,7.0206904127,0.597698826,-0.9299598343

H,0,4.9157625279,-1.9585411471,-3.6674381486  
H,0,7.0491357063,-0.9463953914,-2.8815743502  
Si,0,3.1044831528,-1.841154231,1.5833752732  
O,0,2.1584752243,-0.9401547604,0.525767939  
C,0,4.1841658236,-0.7959794029,2.6993138089  
H,0,3.604204455,-0.0954649158,3.3125149449  
H,0,4.7294543916,-1.4616590638,3.3832543562  
H,0,4.9341791414,-0.2206574839,2.1427107834  
C,0,4.1664870932,-3.0745669538,0.6620963749  
H,0,5.0115144386,-2.6000477967,0.1472680403  
H,0,4.5811071929,-3.8025022491,1.3733402851  
H,0,3.5851275876,-3.6343890366,-0.0814770371  
C,0,1.7926345923,-2.7231437506,2.5831425321  
H,0,1.1426147868,-3.3289114004,1.9373768746  
H,0,2.2410439776,-3.3978740465,3.3239487798  
H,0,1.1605662996,-2.0086046556,3.1282940008  
C,0,-0.6827641343,-0.3607454374,0.3123492831  
H,0,-0.0935347841,-1.2465023859,0.5492224221  
C,0,-1.9324685105,-0.1983958138,0.8870697327  
H,0,-2.3856524715,0.7946331943,0.8213901329  
C,0,-2.2996424766,-0.9672168763,2.1252877707  
H,0,-3.3330675279,-1.3404064517,2.0378057119  
H,0,-1.6544488426,-1.8530432871,2.2293849467  
C,0,-3.1115155207,-2.292604371,-1.0854712469  
O,0,-4.2194249092,-2.9074948902,-0.3998547078  
C,0,-4.4972638706,-0.6491342462,-0.1915209384  
C,0,-3.2123222774,-0.8282674979,-0.7022497559  
H,0,-2.7421302827,-0.1035401992,-1.364893714  
C,0,-5.0923437268,-1.950530091,0.0687536311  
O,0,-6.139125523,-2.2823427554,0.5793016097  
C,0,-3.358117011,-2.4063407708,-2.5887662314  
H,0,-2.5301647894,-1.9510054975,-3.1483011271  
H,0,-3.4314392264,-3.4620621151,-2.8740118313  
H,0,-4.2887932009,-1.9032623863,-2.8743651747  
C,0,-1.8611458337,-3.0576963072,-0.7085496431  
H,0,-1.9636899077,-4.0995784356,-1.0342274681  
H,0,-0.9828096593,-2.6311630567,-1.2098244845  
H,0,-1.6972106291,-3.0555575611,0.3730146684  
C,0,-5.0321546136,0.6639403191,0.0892799165  
O,0,-4.3981122333,1.6999737746,-0.095708164  
O,0,-6.2834699862,0.6601936615,0.5720734315  
C,0,-6.8570830179,1.9406628272,0.8651818058  
H,0,-6.2177171222,2.4639925493,1.587812746  
H,0,-6.8766654856,2.5443615418,-0.0514854705

C,0,-8.2394322668,1.7002189387,1.4091157685  
H,0,-8.7215842256,2.6560723406,1.6429483228  
H,0,-8.8619547059,1.1704118771,0.6800144676  
H,0,-8.2026323226,1.0991782046,2.3240064919  
C,0,-2.2061080028,-0.1094691639,3.382075963  
H,0,-2.8692743992,0.7624470787,3.3047596616  
H,0,-2.5001527542,-0.6729350756,4.2756628612  
H,0,-1.1858458208,0.266688698,3.5386583082

-----

### TS-CCAtt-3

E(RM06)= -2003.95482598 Hartree

Sum of electronic and thermal Free Energies= -2003.310975 Hartree

C,0,-0.9256125457,-3.2406873726,-2.0065318728  
C,0,-1.6072626236,-1.8773441052,-2.1334212836  
C,0,-0.9425812754,-0.9779540376,-1.0835950622  
C,0,-0.5326931581,-3.3008120491,-0.5405560353  
H,0,-1.5770517556,-4.0693661792,-2.3006819453  
H,0,-0.0261960913,-3.2770422019,-2.6348881064  
H,0,-2.6801449985,-1.9752335675,-1.9390941377  
H,0,-1.5013133025,-1.4510470823,-3.1353630666  
H,0,-0.222400264,-0.291635868,-1.548464843  
H,0,0.2837748906,-3.9920572565,-0.3154838209  
H,0,-1.3895961714,-3.5720833869,0.0966102687  
N,0,-0.1529302886,-1.9167905006,-0.2504604036  
C,0,-1.905347806,-0.0882062622,-0.2343457533  
C,0,-2.7417935866,-0.9830179484,0.6832850571  
C,0,-3.8976227799,-1.6431772832,0.2480243123  
C,0,-2.2913506006,-1.2445474692,1.9809842378  
C,0,-4.5696403382,-2.5398303861,1.0753346134  
H,0,-4.3006674343,-1.4472113888,-0.7431784755  
C,0,-2.9585376445,-2.1417701831,2.8107108764  
H,0,-1.4012523324,-0.7351350617,2.3437249178  
C,0,-4.1000186615,-2.7985299432,2.3598789271  
H,0,-5.4690641491,-3.0319627331,0.7115744181  
H,0,-2.581730646,-2.3250653257,3.8150675889  
H,0,-4.6248108765,-3.4978703745,3.0067490331  
C,0,-2.7234360641,0.8303546498,-1.1455671735  
C,0,-3.999310191,1.2707209353,-0.7801105804  
C,0,-2.1469413057,1.3720220091,-2.3015910598  
C,0,-4.6901903154,2.198738398,-1.5559851375  
H,0,-4.4640959366,0.8925487764,0.1279122959  
C,0,-2.8390808643,2.2900773941,-3.084607696  
H,0,-1.1311220024,1.1095765787,-2.5908805356  
C,0,-4.1165395164,2.7052955592,-2.7180842128

H,0,-5.6812437614,2.5240746222,-1.2467466096  
H,0,-2.3668704697,2.693876341,-3.9772877996  
H,0,-4.6561885821,3.4263947377,-3.3278494242  
Si,0,-1.0866517494,2.2151512683,1.2690143203  
O,0,-1.033290582,0.6983825162,0.5503552794  
C,0,-2.6065169594,2.4533264735,2.3376703023  
H,0,-2.7470736052,1.6343767237,3.0544914068  
H,0,-2.4912864988,3.3823743247,2.913694223  
H,0,-3.5243827792,2.5512109304,1.7448055537  
C,0,-0.9516192323,3.5863114893,0.0091008826  
H,0,-1.8635060323,3.7061743795,-0.5890463417  
H,0,-0.7640768335,4.5414294096,0.5199053276  
H,0,-0.1135226751,3.3924964324,-0.674422571  
C,0,0.4584519183,2.1588294144,2.3181271866  
H,0,1.3326357093,2.0129695929,1.6683452511  
H,0,0.6035636805,3.0931021138,2.8770693719  
H,0,0.4279626501,1.3361620437,3.0462153959  
C,0,0.8640820422,-1.5172223106,0.5050895944  
H,0,0.8717151583,-0.4346544471,0.6672131812  
C,0,1.9513793213,-2.2231873884,1.0170512223  
H,0,1.9996866042,-3.2991782425,0.8255445239  
C,0,2.4920312506,-1.8080624236,2.3664079834  
H,0,3.5272554451,-2.1613913743,2.4762730007  
H,0,2.5460791487,-0.71224538,2.4253771488  
C,0,3.3788247819,-1.8140041514,-1.6225324816  
O,0,2.4753729169,-0.8964647278,-2.2775724693  
C,0,3.2031384372,0.1190764932,-0.3581818287  
C,0,3.4661056968,-1.2513926154,-0.2230596044  
H,0,4.229921907,-1.6310454073,0.4548180542  
C,0,2.4320530631,0.2944758679,-1.5752214279  
O,0,1.764473187,1.2127421549,-2.007860579  
C,0,4.7551510288,-1.6876894032,-2.2801659203  
H,0,5.4770780293,-2.3585303477,-1.7985713229  
H,0,4.6795738764,-1.9639008583,-3.3383862086  
H,0,5.1354423209,-0.6633976128,-2.2124589704  
C,0,2.8743845573,-3.2253636741,-1.8097948283  
H,0,2.891695547,-3.486638163,-2.8744103447  
H,0,3.5256470382,-3.9286380841,-1.2761299605  
H,0,1.855637009,-3.352260672,-1.4446958922  
C,0,3.6272536038,1.1219729365,0.5886998192  
O,0,4.2693020092,0.8889040081,1.6065943715  
O,0,3.2802201848,2.3779061614,0.2332854506  
C,0,3.7282252538,3.4238256725,1.1029055948  
H,0,3.4292329105,3.1935304338,2.1343245153

H,0,4.8257593137,3.4599991012,1.0842265024  
C,0,3.1153499009,4.7088457942,0.6161186111  
H,0,3.4429010311,5.543825471,1.2456367657  
H,0,3.4083041464,4.9203039575,-0.4181259312  
H,0,2.0203196035,4.6593998801,0.6531248071  
C,0,1.6508751218,-2.3509007717,3.5154897105  
H,0,1.5782996741,-3.4461880699,3.4770746342  
H,0,2.0780932443,-2.0784482945,4.4884018488  
H,0,0.6263568182,-1.9548082198,3.4761836132

-----

### INT3

E(RM06)= -2003.98674107 Hartree

Sum of electronic and thermal Free Energies= -2003.342056 Hartree

C,0,-0.9237419715,1.1304196367,2.3750160802  
C,0,0.3740734721,1.6261734367,1.726549833  
C,0,0.550537491,0.8172799837,0.4351001145  
C,0,-1.0865680151,-0.2846861757,1.851224547  
H,0,-0.8808687536,1.1521426476,3.4678354811  
H,0,-1.7845310807,1.7332451756,2.0585551956  
H,0,1.2267466051,1.4785035926,2.3959620219  
H,0,0.3326499196,2.6984260396,1.5055267813  
H,0,0.3503861869,1.4217716767,-0.4585535738  
H,0,-2.1193356939,-0.6342037927,1.8465881574  
H,0,-0.4594365046,-1.0064669347,2.3948332692  
N,0,-0.5509660361,-0.1799347024,0.4769468992  
C,0,1.933793017,0.1233870549,0.2165380801  
C,0,2.0980337821,-1.0022096233,1.2415023639  
C,0,2.5078101806,-0.7644550825,2.5592607269  
C,0,1.7227065906,-2.3037021974,0.8990975342  
C,0,2.5188228997,-1.7889424881,3.5025898159  
H,0,2.8393856222,0.2264874902,2.8619352002  
C,0,1.7304328099,-3.3310049596,1.8383724004  
H,0,1.4158089061,-2.5120436608,-0.1224096771  
C,0,2.1226880122,-3.0761266818,3.1493948649  
H,0,2.8433890462,-1.576327369,4.5186941554  
H,0,1.4287336342,-4.3330560356,1.5393315688  
H,0,2.1298128973,-3.8749404368,3.8872284436  
C,0,3.0587175491,1.1605023902,0.2462724007  
C,0,4.3571001564,0.8030601245,0.6232542116  
C,0,2.8470608633,2.4588933079,-0.2302677368  
C,0,5.4052226765,1.7168562072,0.5465222804  
H,0,4.5591055802,-0.2033917287,0.9838825762  
C,0,3.8897959829,3.376998792,-0.3018369204  
H,0,1.8613736082,2.771659124,-0.5681495883

C,0,5.1746252274,3.0105460046,0.0889184989  
H,0,6.4049893475,1.4126164532,0.8480707405  
H,0,3.6956319566,4.3810866284,-0.6718278619  
H,0,5.9903671084,3.7275059109,0.0337787071  
Si,0,2.9289847055,-0.8834461708,-2.2751630236  
O,0,1.8303333585,-0.4208935633,-1.0853504652  
C,0,4.1596025498,-2.1500811669,-1.6536887029  
H,0,3.6717052913,-3.0749399596,-1.3215537996  
H,0,4.8445007055,-2.413596292,-2.4718033931  
H,0,4.772603717,-1.7732546347,-0.825596639  
C,0,3.8370246097,0.5730708077,-3.0144010057  
H,0,4.5991912677,0.9850559234,-2.3417006171  
H,0,4.3491806988,0.2435340056,-3.9294694365  
H,0,3.150105181,1.3812775983,-3.2943698859  
C,0,1.798775278,-1.6473518853,-3.5532772031  
H,0,1.0603279725,-0.9201751782,-3.9151616783  
H,0,2.3724528715,-1.9965173901,-4.4218863563  
H,0,1.2550168969,-2.5121149073,-3.148417496  
C,0,-1.0197146021,-0.7330692431,-0.5945556507  
H,0,-0.4877379851,-0.5031290721,-1.5161734367  
C,0,-2.2126959582,-1.5948940674,-0.6376589072  
H,0,-2.2889578506,-2.1279788087,0.3209414576  
C,0,-2.0966746491,-2.6041833298,-1.7804345213  
H,0,-3.0827414611,-3.0532765254,-1.954690758  
H,0,-1.8518898924,-2.0546473168,-2.703478521  
C,0,-4.7900909481,-1.2897132703,-0.1459404562  
O,0,-4.8917221157,-0.5843049707,1.1093631257  
C,0,-3.4807296026,0.649372328,-0.1806204969  
C,0,-3.5176387356,-0.6978186322,-0.815468128  
H,0,-3.6617809604,-0.6366037736,-1.9057527142  
C,0,-4.2478427589,0.6460707125,1.019676656  
O,0,-4.3837215272,1.4461884496,1.9312985575  
C,0,-6.0077234051,-0.937256143,-0.9904254835  
H,0,-5.9966679972,-1.4953636885,-1.9358956796  
H,0,-6.9267392269,-1.1895746365,-0.448420703  
H,0,-6.0266354773,0.1339915655,-1.2221735199  
C,0,-4.8196548264,-2.7663957202,0.1947572977  
H,0,-5.7434849908,-2.9803567125,0.7448050443  
H,0,-4.8192683608,-3.3893696433,-0.7073311965  
H,0,-3.9853404373,-3.0716547905,0.836767903  
C,0,-2.6610787142,1.6638217397,-0.7097673974  
O,0,-1.9090505835,1.5008002727,-1.6900914918  
O,0,-2.7004755499,2.8589991612,-0.0601168592  
C,0,-1.8313793457,3.8765560754,-0.5453721123

H,0,-0.7923106508,3.5086071549,-0.5512781489  
H,0,-2.0856481008,4.1211135546,-1.5857130457  
C,0,-1.9850852776,5.0694345954,0.3613855324  
H,0,-1.3305881176,5.8846497941,0.0321295076  
H,0,-3.0183536882,5.433172492,0.3563899293  
H,0,-1.7264396874,4.8133434154,1.3959185175  
C,0,-1.0739438493,-3.6956373461,-1.5198191541  
H,0,-1.3120627589,-4.2472693794,-0.59926904  
H,0,-1.0348616872,-4.4182345701,-2.3427810213  
H,0,-0.0624793976,-3.2813686656,-1.3997519748

-----

**ee-TS-CCAtt-endo**

E(RM06)= -2003.96868864 Hartree

Sum of electronic and thermal Free Energies= -2003.325830 Hartree

C,0,-1.4464030603,2.6235244475,-0.8434751418  
C,0,-0.4156433818,1.708044382,-1.5100218864  
C,0,-0.0124519246,0.6483097984,-0.4636611821  
C,0,-1.1985326699,2.442516894,0.643766533  
H,0,-1.3383957291,3.667555044,-1.1562315708  
H,0,-2.4614115519,2.2944732953,-1.0995364033  
H,0,0.4590964662,2.2814553747,-1.8307798879  
H,0,-0.8274627573,1.2277427439,-2.4028802922  
H,0,-0.351331423,-0.3554012624,-0.7478079045  
H,0,-2.0871813919,2.5914167763,1.2671918709  
H,0,-0.4011722023,3.1068201873,1.0100959489  
N,0,-0.767612127,1.044087054,0.7396555254  
C,0,1.5390026208,0.5302052552,-0.2595033284  
C,0,2.0168751956,1.7317611124,0.5563886479  
C,0,2.294162097,2.9772544315,-0.020057468  
C,0,2.0686291216,1.6306489032,1.950712249  
C,0,2.6210272601,4.0785611281,0.7679070922  
H,0,2.2696687077,3.1014597636,-1.100323194  
C,0,2.3939274624,2.7291071801,2.7412582697  
H,0,1.8402862368,0.6766741451,2.4226790845  
C,0,2.6716514676,3.9605276868,2.1534509224  
H,0,2.8389475044,5.0313033511,0.2902329515  
H,0,2.4266564582,2.6200405855,3.8233107931  
H,0,2.928176027,4.819449583,2.7693510139  
C,0,2.2281783872,0.347922761,-1.6178609276  
C,0,3.5124687956,0.83864412,-1.8679021376  
C,0,1.6298842739,-0.4522501078,-2.6011388324  
C,0,4.1724513884,0.5591798439,-3.0633336605  
H,0,4.0186156908,1.4450509799,-1.1207702882  
C,0,2.2818235589,-0.7263534241,-3.7982150683



H,0,0.6426839422,-0.8840701597,-2.4432961558  
C,0,3.5571445237,-0.2197545103,-4.0371534377  
H,0,5.1719452153,0.9557597407,-3.2285271482  
H,0,1.7878687164,-1.3434873618,-4.5451258599  
H,0,4.0674650706,-0.4342126307,-4.9733529176  
Si,0,3.1018193301,-1.6200473577,0.7313297564  
O,0,1.7362062493,-0.6652343242,0.4833621814  
C,0,4.628812239,-0.6486604187,1.2160423644  
H,0,4.4715480201,-0.0598590948,2.1282006557  
H,0,5.4380995563,-1.3648055352,1.4194171875  
H,0,4.9855538946,0.0283381334,0.4310319866  
C,0,3.4858420716,-2.7023178039,-0.7452426577  
H,0,3.9146679439,-2.1400225428,-1.5835613852  
H,0,4.2209618678,-3.4621393075,-0.4438052246  
H,0,2.5962803764,-3.2305286412,-1.1118744449  
C,0,2.6032607623,-2.686967994,2.1841734661  
H,0,1.656701191,-3.2171491172,2.0150088752  
H,0,3.3751716882,-3.4430480962,2.3817779544  
H,0,2.4998857338,-2.0787599801,3.092342211  
C,0,-1.1323961848,0.2769337748,1.7708725171  
H,0,-1.7686180715,0.7995094051,2.4890909086  
C,0,-0.9527800893,-1.0841758145,1.9317241041  
H,0,-0.1046350053,-1.5326343284,1.424379137  
C,0,-1.3821279646,-1.7026810949,3.2375913557  
H,0,-2.3846896357,-1.3298668904,3.501331194  
H,0,-1.4888932199,-2.7913976656,3.1068808097  
C,0,-1.9834395472,-2.8822197419,-0.3686007204  
O,0,-1.9043386642,-2.2184410611,-1.650108236  
C,0,-3.0730483729,-0.8274811383,-0.2686125133  
C,0,-2.5382385316,-1.8125852558,0.5566960319  
H,0,-3.0328285529,-2.118190423,1.4759819176  
C,0,-2.622039565,-1.0454648041,-1.6317980695  
O,0,-2.7481648199,-0.3961283608,-2.6483971529  
C,0,-0.6158124773,-3.467188534,-0.0843790873  
H,0,-0.590263113,-3.9259939907,0.9118694151  
H,0,-0.3942585895,-4.2460406742,-0.8236296417  
H,0,0.1672875311,-2.7044080771,-0.1486648267  
C,0,-3.0190037716,-3.9996509993,-0.474458804  
H,0,-2.7159874641,-4.7136809475,-1.2486695883  
H,0,-3.1015893273,-4.5345114236,0.4799618448  
H,0,-4.0052948055,-3.5997259182,-0.7351532806  
C,0,-3.8934778526,0.2421786749,0.2438122838  
O,0,-4.061713015,0.4438068927,1.4429703432  
O,0,-4.4632416373,1.0084471464,-0.7047766781

C,0,-5.2649664198,2.1019111714,-0.2417817027  
H,0,-6.0815050524,1.7129247543,0.3800247076  
H,0,-4.6530118887,2.7536213847,0.3977610961  
C,0,-5.776282695,2.8295625185,-1.4556676172  
H,0,-6.3985286246,3.6781895817,-1.1507054328  
H,0,-4.9483015135,3.210662482,-2.0644308577  
H,0,-6.381261959,2.1674085647,-2.0844960185  
C,0,-0.4232078447,-1.4313321538,4.3909910513  
H,0,-0.3261017353,-0.3530683617,4.5760456401  
H,0,-0.7682948689,-1.9005085149,5.3207656483  
H,0,0.5795467705,-1.8201553766,4.1731446705

-----

**dr1-TS-CCAtt-endo**

E(RM06)= -2003.96618239 Hartree

Sum of electronic and thermal Free Energies= -2003.324698 Hartree

C,0,0.9991250775,-2.5579781566,-0.4886388195  
C,0,-0.2605426271,-2.0023949908,-1.1602645848  
C,0,-0.5416410377,-0.6305733769,-0.5200395953  
C,0,1.1046177056,-1.8004736889,0.8229745227  
H,0,0.9453202083,-3.6405910631,-0.3294492599  
H,0,1.872111418,-2.3428049357,-1.1153262496  
H,0,-1.1103201536,-2.6770554601,-1.0248010715  
H,0,-0.1080459353,-1.8953450855,-2.2382694038  
H,0,-0.3859560301,0.1774513325,-1.2494430743  
H,0,2.1294378222,-1.6969598538,1.1879144083  
H,0,0.5069399741,-2.2698128842,1.6219385457  
N,0,0.515411173,-0.4938130831,0.5041367346  
C,0,-1.9873850021,-0.4530766195,0.0588307891  
C,0,-2.1499663558,-1.3422612288,1.2930764434  
C,0,-2.4706532776,-2.7007357842,1.1922969162  
C,0,-1.9070841236,-0.8154483044,2.5646492171  
C,0,-2.5119044437,-3.5134271632,2.3221543347  
H,0,-2.715367803,-3.134939599,0.2250051401  
C,0,-1.9461100486,-1.6257753472,3.6962358523  
H,0,-1.6919724826,0.2457537454,2.6641335305  
C,0,-2.240148932,-2.981397118,3.5798196948  
H,0,-2.7671093178,-4.5655931714,2.2162863992  
H,0,-1.748746903,-1.1912249889,4.6742200188  
H,0,-2.2716806467,-3.6154826533,4.4629478335  
C,0,-3.0653986271,-0.7101511963,-0.9950729826  
C,0,-4.387432034,-0.8955850234,-0.5731742586  
C,0,-2.8158051782,-0.6354465434,-2.367998235  
C,0,-5.4232250722,-1.0258569737,-1.4906306627  
H,0,-4.6081129981,-0.9292839756,0.4928579277

C,0,-3.8522033391,-0.7644922993,-3.2914183056  
H,0,-1.8082925255,-0.4722768953,-2.7433115329  
C,0,-5.1584147337,-0.9643239022,-2.8574773024  
H,0,-6.4416398093,-1.171100535,-1.1368848925  
H,0,-3.630127979,-0.7087653377,-4.3548071933  
H,0,-5.9658372058,-1.0680912266,-3.5787815442  
Si,0,-2.5075397682,2.3533075192,-0.2125327476  
O,0,-2.1143309277,0.8875420198,0.5051340163  
C,0,-4.3262481999,2.5101202075,-0.617629399  
H,0,-4.9585747775,2.22924445,0.2342015848  
H,0,-4.5410597084,3.5620418304,-0.855395953  
H,0,-4.6283816133,1.9087236207,-1.4834240713  
C,0,-1.5002914614,2.7144164417,-1.7508952673  
H,0,-1.9028750035,2.1932863096,-2.6291924974  
H,0,-1.5556611297,3.7921316285,-1.9631994768  
H,0,-0.4365751416,2.4553862075,-1.6673700656  
C,0,-2.0994652268,3.5547468397,1.1662395268  
H,0,-1.0876522998,3.4083892035,1.5673892773  
H,0,-2.1738562851,4.5944321658,0.8209024086  
H,0,-2.8020709392,3.4275232283,2.0001572423  
C,0,0.7608028101,0.6426352062,1.1651849516  
H,0,0.0395966513,1.4339352982,0.9706648971  
C,0,1.8789066496,0.9321678643,1.9283909835  
H,0,2.5345158809,0.1052853839,2.2123727208  
C,0,1.8717348827,2.0776999489,2.9035659681  
H,0,2.8668940428,2.5493026021,2.9328620752  
H,0,1.1706763304,2.8558772818,2.5715635113  
C,0,2.7096526428,2.5910832837,-0.5884809084  
O,0,2.0453656678,1.8940742246,-1.6662041973  
C,0,3.3118204817,0.3539287418,-0.555050258  
C,0,3.213246564,1.4596771289,0.2853965848  
H,0,3.9453013931,1.6722640042,1.0633822702  
C,0,2.4913947646,0.5900456496,-1.730315086  
O,0,2.1491294747,-0.119811743,-2.6531675482  
C,0,1.7543572182,3.6212089641,-0.026900639  
H,0,2.2358591916,4.1884160835,0.7779877532  
H,0,1.4825703511,4.3270265598,-0.8210448223  
H,0,0.8316933173,3.1813826244,0.3574299934  
C,0,3.9264987105,3.3154169119,-1.1702600653  
H,0,3.5926847598,4.0511158891,-1.9110781469  
H,0,4.4754015785,3.8427253597,-0.3804597414  
H,0,4.6106943762,2.6134202264,-1.6583510954  
C,0,4.0548194799,-0.8300244799,-0.1930854221  
O,0,4.5449851588,-1.0119833203,0.9162629464

O,0,4.1599125519,-1.7314707479,-1.1851207279  
C,0,4.7974519941,-2.9720253104,-0.8532312021  
H,0,5.8265879741,-2.7748116563,-0.5278346393  
H,0,4.2682879947,-3.4289263255,-0.0047651623  
C,0,4.7478157039,-3.8423586956,-2.0792958351  
H,0,5.2289557937,-4.8054846005,-1.8762463116  
H,0,3.7124966304,-4.0324933981,-2.3851263767  
H,0,5.2680370024,-3.3679054903,-2.9184727566  
C,0,1.4952638085,1.6269290021,4.3109964785  
H,0,2.1766833213,0.8460716109,4.6717089849  
H,0,1.5320949601,2.4588469417,5.0248296226  
H,0,0.4790925225,1.2108715988,4.3298420631

-----

**dr2-TS-CCAtt-endo**

E(RM06)= -2003.96010246 Hartree

Sum of electronic and thermal Free Energies= -2003.317093 Hartree

C,0,-2.2108259217,1.8813382811,2.3614561599  
C,0,-0.9161160408,2.3934883784,1.7124550362  
C,0,-0.3440644065,1.2411557022,0.8632943137  
C,0,-2.1870888366,0.3739032329,2.161224962  
H,0,-2.2796705511,2.1479985048,3.4215088331  
H,0,-3.077798652,2.3134072493,1.8484843692  
H,0,-0.192123119,2.7231036051,2.4638161797  
H,0,-1.12440814,3.2588279991,1.0722216551  
H,0,-0.2186097883,1.5258067513,-0.1831892911  
H,0,-3.1831332226,-0.0563486054,2.0127296318  
H,0,-1.7049448806,-0.150191113,2.9986364882  
N,0,-1.3950094305,0.2095512726,0.9338254699  
C,0,1.068130081,0.7209889109,1.3077122234  
C,0,0.935310718,-0.1102811592,2.5825897482  
C,0,0.802777371,0.4833338753,3.8438920898  
C,0,0.8426693806,-1.5016780266,2.4981365958  
C,0,0.5871425145,-0.2888429228,4.9818480045  
H,0,0.8747608012,1.5639331713,3.9498654844  
C,0,0.6265775814,-2.2777883053,3.6344357945  
H,0,0.9360153562,-1.9785220309,1.5245410689  
C,0,0.4957069828,-1.6748453623,4.8823602085  
H,0,0.4933067101,0.197915034,5.9501934256  
H,0,0.5603417582,-3.3597955471,3.5409912966  
H,0,0.3298507511,-2.2794994729,5.7710733988  
C,0,2.0454505088,1.8955277574,1.4421560992  
C,0,3.1116563917,1.8653456022,2.3453775399  
C,0,1.9640186826,2.983929079,0.5659124837  
C,0,4.0587582091,2.8872150413,2.3780474391

H,0,3.2152782869,1.0303856629,3.0349258376  
C,0,2.9016889168,4.009437258,0.5982702257  
H,0,1.1613461995,3.035858935,-0.1668872572  
C,0,3.9564721541,3.9666443411,1.5068443412  
H,0,4.8785022242,2.8350732049,3.0913940249  
H,0,2.8091044508,4.8432827624,-0.0957221774  
H,0,4.6918212058,4.7674584245,1.5333330527  
Si,0,3.0290218669,-0.5046685969,-0.3334258854  
O,0,1.4942189745,-0.1073673632,0.2370244239  
C,0,4.1835308965,-1.1289726658,1.0067588629  
H,0,3.6947573249,-1.8456260147,1.6789305575  
H,0,5.0203413191,-1.6522894341,0.5222743733  
H,0,4.612253389,-0.3243950558,1.6151837038  
C,0,3.8359790764,0.8967064191,-1.2747647627  
H,0,4.2427285632,1.6850665114,-0.6304756732  
H,0,4.6679467623,0.4884510434,-1.8664153836  
H,0,3.1288375463,1.3558172571,-1.9782907304  
C,0,2.6906801513,-1.8935537486,-1.5338248639  
H,0,2.0418584884,-1.5516319993,-2.3502660212  
H,0,3.6327649112,-2.238716452,-1.9809645887  
H,0,2.2158589812,-2.7538058256,-1.0459460696  
C,0,-1.7237107756,-0.7321699015,0.0428556633  
H,0,-2.4706171963,-1.4273171413,0.4350689158  
C,0,-1.3782698436,-0.8815768038,-1.289428697  
H,0,-0.4886479075,-0.3649130519,-1.6582991154  
C,0,-1.7350773602,-2.1767149597,-1.9761571811  
H,0,-2.6471198268,-2.5885856943,-1.5200829071  
H,0,-1.9855312455,-1.9804960727,-3.0310572706  
C,0,-4.1364376282,0.5031120465,-1.9398308243  
O,0,-4.3521488542,1.5449618851,-0.9640730618  
C,0,-2.2674184478,1.8735194971,-1.8308694356  
C,0,-2.6504908662,0.5965830472,-2.2344573787  
H,0,-2.2750774599,0.1475656017,-3.1526925378  
C,0,-3.302915919,2.4364120668,-0.9830235766  
O,0,-3.3719923063,3.4685595861,-0.3494265374  
C,0,-4.8808194005,0.8880786702,-3.2205108361  
H,0,-4.7426703655,0.1188352487,-3.9903890945  
H,0,-5.9521486661,0.9796638203,-3.0085897106  
H,0,-4.5214674436,1.8441720471,-3.616280203  
C,0,-4.7301435455,-0.7728908861,-1.3873791606  
H,0,-5.8060807756,-0.6272790429,-1.2375782718  
H,0,-4.5968844758,-1.6012512041,-2.0917817637  
H,0,-4.29523889,-1.0471121427,-0.4230332135  
C,0,-1.027249553,2.4771476459,-2.2615137864

O,0,-0.1997841113,1.9065599882,-2.9628618032  
O,0,-0.8517702629,3.7358526952,-1.8148483852  
C,0,0.2917055693,4.4415805574,-2.3138585946  
H,0,1.199904545,3.8477395426,-2.1397615326  
H,0,0.1908757881,4.5576469993,-3.4011379225  
C,0,0.3361502972,5.7685802165,-1.6054929202  
H,0,1.2030500237,6.3484033038,-1.9420869304  
H,0,-0.5681717734,6.3521117637,-1.8086194582  
H,0,0.4083131311,5.6304811991,-0.5193170588  
C,0,-0.6395883977,-3.2328179166,-1.9266076724  
H,0,-0.3692712433,-3.4733210323,-0.8895514944  
H,0,-0.9639382213,-4.1609008298,-2.4135903786  
H,0,0.2681266404,-2.8903766958,-2.4355885533

-----

H<sub>2</sub>O

E(RM06)= -76.4024626846 Hartree

Sum of electronic and thermal Free Energies= -76.398617 Hartree

O,0,0.,0.,0.1104077121  
H,0,0.,0.7661240253,-0.472744856  
H,0,0.,-0.7661240253,-0.472744856

-----

**TS-Hyd**

E(RM06)= -2080.36814761 Hartree

Sum of electronic and thermal Free Energies= -2079.702150 Hartree

C,0,0.7790307029,-2.2926979,3.0704193284  
C,0,1.85705316,-1.2712713139,2.7087666314  
C,0,1.3087079325,-0.527489636,1.4821487929  
C,0,0.1937725719,-2.6526163767,1.7155907822  
H,0,1.1810272918,-3.1621713551,3.6001116885  
H,0,0.0002805553,-1.839619395,3.6962109634  
H,0,2.7893266824,-1.790713673,2.4655655888  
H,0,2.0799547691,-0.5828438387,3.5300498027  
H,0,0.8855181918,0.4440410073,1.7778577161  
H,0,-0.8127992202,-3.0768929777,1.7612588331  
H,0,0.8485885045,-3.3565297467,1.180878581  
N,0,0.1783656478,-1.360598464,1.0102865708  
C,0,2.2963877957,-0.2104619508,0.3180204514  
C,0,2.8707572784,-1.5043679193,-0.2653391865  
C,0,3.9551435836,-2.1602651176,0.331614755  
C,0,2.292008194,-2.0873449432,-1.3940027102  
C,0,4.4252372909,-3.3715372339,-0.1654669183  
H,0,4.4633058131,-1.7095795372,1.1820320863  
C,0,2.7665719917,-3.2959590554,-1.900898153  
H,0,1.4612034577,-1.5832386271,-1.8822143939

C,0,3.8282506595,-3.9491049978,-1.2836511316  
H,0,5.2706206157,-3.8575941904,0.3165849587  
H,0,2.2996395557,-3.7274322495,-2.7841945855  
H,0,4.1987204299,-4.8927027448,-1.6777434101  
C,0,3.4022552321,0.7503158874,0.7675899055  
C,0,4.5515030201,0.8856665555,-0.0204038239  
C,0,3.2749078445,1.5834983384,1.8829739095  
C,0,5.5365784772,1.8161533765,0.2913854786  
H,0,4.6793056458,0.2516160387,-0.8959087558  
C,0,4.2648594204,2.5086046183,2.2076441457  
H,0,2.3938983123,1.5356136761,2.5179891736  
C,0,5.39954822,2.6307547597,1.4127919878  
H,0,6.4164901886,1.8998624125,-0.3427305331  
H,0,4.1407500939,3.140734411,3.0839741095  
H,0,6.1712517591,3.3546978255,1.6635332669  
Si,0,1.5436071545,1.7429027517,-1.6698527602  
O,0,1.4783042785,0.4047744178,-0.6556574565  
C,0,2.9376645083,1.6230323098,-2.92020231  
H,0,3.0354150642,0.6050511487,-3.3205489934  
H,0,2.7167748826,2.2875922883,-3.7671303715  
H,0,3.9085695675,1.9262882727,-2.5112789317  
C,0,1.6624297845,3.3331823495,-0.6935643886  
H,0,2.6596226918,3.5009194878,-0.2678855704  
H,0,1.430274326,4.1851406725,-1.347324122  
H,0,0.9286745315,3.3404419849,0.1238144491  
C,0,-0.0962790602,1.648434095,-2.5553800595  
H,0,-0.9272294276,1.7258129533,-1.8401560288  
H,0,-0.1933704047,2.4780417176,-3.268702922  
H,0,-0.1983572777,0.712835689,-3.1220450578  
C,0,-0.9587674484,-0.7447535661,0.6624810274  
H,0,-0.8154038031,0.2939960672,0.3491047424  
C,0,-2.0908710777,-1.4378585817,-0.0550589571  
H,0,-2.4429242004,-2.2741290822,0.569309146  
C,0,-1.5340360199,-1.9729135907,-1.3959585103  
H,0,-2.329743175,-1.8981629683,-2.1475576868  
H,0,-0.7498683065,-1.2820587597,-1.7447182636  
C,0,-4.6225242853,-1.1653671584,-0.6896999204  
O,0,-5.4364828145,-0.9827523899,0.4963285009  
C,0,-3.6963335407,0.491449701,0.7483289945  
C,0,-3.2671896465,-0.4675686241,-0.3557531078  
H,0,-2.9476573066,0.1141072021,-1.2356821685  
C,0,-5.0295056837,0.114691022,1.2052390412  
O,0,-5.7260168465,0.5522227687,2.0960197375  
C,0,-5.3066597656,-0.4276473433,-1.8298439294

H,0,-4.7665412944,-0.5875184096,-2.7721825728  
H,0,-6.3364286045,-0.7832011044,-1.9529319376  
H,0,-5.3379610561,0.6518613574,-1.6336585739  
C,0,-4.639601822,-2.6602045758,-0.9452407197  
H,0,-5.6827948617,-2.9825240503,-1.0420582538  
H,0,-4.1228197818,-2.9276599705,-1.8730779203  
H,0,-4.2011896546,-3.2252075929,-0.1157303113  
C,0,-3.2311915656,1.8587005345,0.6650965634  
O,0,-2.1728212251,2.1841463976,0.1221948587  
O,0,-4.0120554145,2.7647130465,1.2796114471  
C,0,-3.5383164988,4.1163204488,1.2896512711  
H,0,-2.5597419541,4.1530252977,1.7870263716  
H,0,-3.3897316883,4.4569303146,0.2570522924  
C,0,-4.5646149101,4.9470693326,2.0119003239  
H,0,-4.2402835194,5.9930808116,2.0509024254  
H,0,-5.5325856467,4.9061630922,1.5006679982  
H,0,-4.708721572,4.5907027607,3.0376548969  
C,0,-1.0081295566,-3.396426075,-1.3738591932  
H,0,-1.766604049,-4.0964818862,-0.9983531122  
H,0,-0.7330924537,-3.7224592138,-2.3844816262  
H,0,-0.115240534,-3.5014887725,-0.7489051313  
O,0,-1.8396141381,-0.3877763497,2.2762305391  
H,0,-1.3948192494,0.3532325401,2.7141071099  
H,0,-2.7756684884,0.0485955181,1.805636696

-----

**TS-Hyd-water**

E(RM06)= -2156.79410650 Hartree

Sum of electronic and thermal Free Energies= -2156.103266 Hartree

C,0,0.8953081243,-0.7713107277,-0.9127971465  
H,0,1.2757697706,-0.4754837117,0.0680306014  
C,0,1.9468133461,-1.4180932695,-1.7865943826  
H,0,1.5786012681,-1.4228767585,-2.8252564044  
C,0,2.1343793319,-2.8671909079,-1.2702397345  
H,0,3.1888155129,-3.1357691798,-1.4082068234  
H,0,1.988066174,-2.8589013227,-0.1781999239  
C,0,4.287243779,-1.0572163089,-2.8999279367  
O,0,4.2527786458,0.1118286592,-3.7564700284  
C,0,3.3899555879,0.8096490417,-1.7580374538  
C,0,3.3299049487,-0.7077701658,-1.7145286508  
H,0,3.7894749702,-1.0592534203,-0.7758286621  
C,0,3.938339891,1.2334057343,-3.0318674938  
O,0,4.0880362606,2.3321489114,-3.526502983  
C,0,5.7086211698,-1.2071285201,-2.3799204794  
H,0,5.80500727,-2.1222620171,-1.781120362



H,0,6.4161995935,-1.2616352774,-3.2156318269  
H,0,5.9882525561,-0.3545868844,-1.7483536009  
C,0,3.9460038466,-2.2163952586,-3.8174398924  
H,0,4.6592679085,-2.214629183,-4.6498154778  
H,0,4.0294219385,-3.1850655979,-3.3135160264  
H,0,2.9445316001,-2.1231706067,-4.2504610762  
C,0,3.4851974212,1.553301354,-0.5484622159  
O,0,3.1000821454,1.131057426,0.5627733724  
O,0,3.9809296793,2.8003150418,-0.6690955376  
C,0,4.0891267651,3.5806810906,0.5234301243  
H,0,3.0895274484,3.7435674616,0.9529104945  
H,0,4.6757163843,3.0309250646,1.2702971816  
C,0,4.7386976942,4.8854427585,0.1479256278  
H,0,4.8388865671,5.5240690213,1.0326470718  
H,0,5.7365884646,4.7180142515,-0.2711583274  
H,0,4.1439575471,5.4202504096,-0.6003432994  
C,0,1.2737346127,-3.9487396307,-1.8983029178  
H,0,1.3409124821,-3.9320593191,-2.9945891231  
H,0,1.6088628658,-4.9395467979,-1.5665003373  
H,0,0.2184269432,-3.860554698,-1.6174144961  
O,0,0.7315858205,0.8422033888,-1.6377387306  
H,0,0.5140114452,1.4414700916,-0.881193227  
H,0,1.7160836385,1.0595780392,-1.8648141514  
O,0,0.5545355048,2.1143381185,0.7662990077  
H,0,1.4841429497,1.8513792237,0.9541729836  
H,0,0.4882864399,3.0580671446,0.9486078427  
C,0,-2.3696719708,-1.6849015698,3.7447961779  
C,0,-1.9796201505,-0.9270582602,2.633854228  
C,0,-2.2299165289,0.4493443853,2.6663255483  
C,0,-2.8587897495,1.040424003,3.7599090629  
C,0,-3.239931886,0.2717723483,4.854788476  
C,0,-2.9880308899,-1.0974663453,4.8438541965  
C,0,-1.1933367783,-1.5993940096,1.4987719403  
O,0,0.1872217297,-1.5997827185,1.8142995596  
Si,0,1.1203334497,-1.5626038993,3.2111744934  
C,0,0.9541875568,0.0655424924,4.1159365627  
C,0,-1.2736424019,-0.7579988301,0.1881752661  
C,0,-2.634692068,-0.6821076232,-0.5076483294  
C,0,-2.5370807239,-1.6644640553,-1.6722468592  
C,0,-1.1013273558,-1.4976762223,-2.1264364374  
N,0,-0.3643762047,-1.2638341221,-0.8688444289  
H,0,-2.7746361019,0.335608345,-0.8975725606  
C,0,-1.662881369,-3.0336595936,1.2547082542  
C,0,-3.0226215203,-3.37033324,1.2531290551

C,0,-3.4420592256,-4.6640261115,0.9618431949  
C,0,-2.5074917586,-5.6553246972,0.668960159  
C,0,-1.1536367777,-5.3372995271,0.679979703  
C,0,-0.7381882418,-4.0385241472,0.9691406806  
C,0,0.753411144,-2.9963865817,4.3639329692  
C,0,2.8522935887,-1.7335905036,2.5328276994  
H,0,-0.9235408516,0.2418828814,0.4691554447  
H,0,-3.7707192823,-2.617940224,1.4956742576  
H,0,-4.5042104952,-4.8992235579,0.9714706272  
H,0,-2.833157852,-6.6686547724,0.4452067387  
H,0,-0.4104841806,-6.1019451561,0.4616253293  
H,0,0.3226670244,-3.7987626696,0.9777729566  
H,0,-1.9263298436,1.0928109316,1.8447324624  
H,0,-3.043510448,2.1123875103,3.7545952363  
H,0,-3.7279964965,0.7350955522,5.7091296927  
H,0,-3.2764371388,-1.715348135,5.6915096179  
H,0,-2.1878038005,-2.757729555,3.7540280522  
H,0,-0.1249995371,-2.8227541243,4.9967042905  
H,0,0.6000725405,-3.9343125556,3.8142746699  
H,0,1.6136306318,-3.1449436544,5.0316119305  
H,0,3.5849930623,-1.6900934328,3.3501532775  
H,0,2.9936286591,-2.692503572,2.01559066  
H,0,3.0854098542,-0.9175101675,1.8338121332  
H,0,-0.0014211189,0.1669346378,4.6447018932  
H,0,1.7585622364,0.1536692131,4.8596087463  
H,0,1.0509671308,0.9102428975,3.4208438002  
H,0,-0.7117393052,-2.3686058613,-2.6611592421  
H,0,-0.9935825613,-0.6166848567,-2.7769111982  
H,0,-3.4722568813,-0.8857423647,0.1664859314  
H,0,-3.2501298796,-1.4470139697,-2.4732863401  
H,0,-2.7112401663,-2.6945217798,-1.334233478

-----

#### INT4

E(RM06)= -2080.42163672 Hartree

Sum of electronic and thermal Free Energies= -2079.750613 Hartree

C,0,-0.7429147897,-0.5647835474,-3.6202931562  
C,0,-1.8890804569,0.0691675842,-2.8402926605  
C,0,-1.3749467088,0.1439091339,-1.3924774509  
C,0,-0.1640597607,-1.5261593343,-2.5939195948  
H,0,-1.0782828362,-1.0600352054,-4.5385496006  
H,0,0.0100338795,0.1851422778,-3.8983576555  
H,0,-2.7696319795,-0.5788209782,-2.9064593704  
H,0,-2.1849956813,1.0503511022,-3.2265810829  
H,0,-0.9683904035,1.1539755645,-1.2004887998

H,0,0.8742477593,-1.805561236,-2.8007224507  
H,0,-0.7611251898,-2.453455729,-2.5640620637  
N,0,-0.270293089,-0.8272900894,-1.3063371211  
C,0,-2.4262709566,-0.0718666525,-0.2569223478  
C,0,-3.0618320149,-1.4603416947,-0.360252866  
C,0,-4.1204749995,-1.7142891622,-1.2417402702  
C,0,-2.585947963,-2.5212399029,0.4117424029  
C,0,-4.6584534925,-2.9907460939,-1.3736523633  
H,0,-4.5557690474,-0.9002276885,-1.8187165569  
C,0,-3.127247083,-3.7996290515,0.289233343  
H,0,-1.7875272232,-2.3370475514,1.1252739344  
C,0,-4.1587927138,-4.0438050686,-0.6114226892  
H,0,-5.4809085524,-3.1574594478,-2.0660269708  
H,0,-2.7386661335,-4.6079797621,0.9057496038  
H,0,-4.5810188639,-5.0415259786,-0.708689827  
C,0,-3.5019189567,1.0201256735,-0.2371820459  
C,0,-4.6365853033,0.8323462762,0.5626732668  
C,0,-3.3702302834,2.2415554338,-0.9026311108  
C,0,-5.6009687358,1.8248204029,0.6950203437  
H,0,-4.7653432573,-0.1101725035,1.0935155148  
C,0,-4.340122312,3.235681333,-0.7843186986  
H,0,-2.5004572397,2.4472951085,-1.5207929956  
C,0,-5.4582236774,3.0339010754,0.0170485335  
H,0,-6.4693356805,1.6500216941,1.3268010819  
H,0,-4.2122031371,4.1750215136,-1.3179641549  
H,0,-6.2141706713,3.8100259071,0.1123129345  
Si,0,-1.6176922424,0.8741548205,2.3529732449  
O,0,-1.6693844636,-0.0162173851,0.9383405642  
C,0,-2.9955046711,0.3842181423,3.5281551476  
H,0,-3.1636352026,-0.7011896511,3.51036036  
H,0,-2.7182226812,0.657588842,4.5556478968  
H,0,-3.9461601765,0.8817434033,3.3014543486  
C,0,-1.6276291043,2.7227458032,2.0570993668  
H,0,-2.6078002432,3.1077855504,1.7508970319  
H,0,-1.3411161674,3.2337422243,2.9870602608  
H,0,-0.8890458973,3.0051735657,1.2940862446  
C,0,0.0277192043,0.3843950634,3.0934819133  
H,0,0.8634364851,0.7520891867,2.4814339818  
H,0,0.1395771873,0.8212613758,4.0953073031  
H,0,0.1177433295,-0.7055871378,3.1936111535  
C,0,0.9555997011,-0.3021878035,-0.7582515073  
H,0,0.6659345476,0.3424481208,0.0869930292  
C,0,1.9139689902,-1.3821677863,-0.2340787295  
H,0,2.2894529573,-1.924403616,-1.1187118922

C,0,1.1376594323,-2.3535833836,0.6807231342  
H,0,1.672586462,-2.4834090788,1.6280699233  
H,0,0.1838414767,-1.8811546364,0.9455963596  
C,0,4.2849338849,-1.798353481,0.7996135435  
O,0,5.4080826358,-0.9094482715,1.1173008618  
C,0,3.8943259247,0.3685537796,-0.105249541  
C,0,3.1269002964,-0.7985520059,0.5187894932  
H,0,2.7685865864,-0.4422530573,1.5005360666  
C,0,5.2312438545,0.3166934685,0.6144415622  
O,0,6.0381619052,1.2019414885,0.7469378278  
C,0,4.1404387293,-2.6800000185,2.0232969739  
H,0,3.4609811936,-3.5182088914,1.8379058992  
H,0,5.1207410483,-3.100291128,2.2770988353  
H,0,3.7779952864,-2.1109959509,2.887340137  
C,0,4.7064694019,-2.619532505,-0.4065612168  
H,0,5.647884209,-3.1343389819,-0.1832881728  
H,0,3.9550773409,-3.3801537835,-0.64719652  
H,0,4.8628797196,-2.0003298262,-1.2980485091  
C,0,3.2675254916,1.7284996684,0.0581351996  
O,0,2.4853091524,2.0216160233,0.9386371789  
O,0,3.7190582852,2.5852317336,-0.8548837283  
C,0,3.2298580392,3.9356244229,-0.7597389941  
H,0,2.1334857178,3.9165583381,-0.8291293219  
H,0,3.4915214578,4.3353658918,0.2271358735  
C,0,3.8556961033,4.7239677502,-1.8763393994  
H,0,3.5093028365,5.7623589598,-1.8389383664  
H,0,4.9474642258,4.7244720031,-1.7911432974  
H,0,3.5868631454,4.3084911657,-2.8538294298  
C,0,0.8723846768,-3.7179812141,0.0673669763  
H,0,1.8060928907,-4.2225068047,-0.2208100887  
H,0,0.351660046,-4.3783285019,0.771950985  
H,0,0.2492512851,-3.6407417981,-0.8319354025  
O,0,1.6975387766,0.4735635458,-1.711198242  
H,0,1.172863616,1.2477885859,-1.9515077662  
H,0,4.0939328678,0.2120143729,-1.1741276078

-----

**ee-TS-Hyd-water**

E(RM06)= -2156.79019421 Hartree

Sum of electronic and thermal Free Energies= -2156.096962 Hartree

C,0,1.4977428122,-3.3557051608,1.810997615  
C,0,2.0676382252,-1.9648791245,2.1665184469  
C,0,1.3724547773,-0.9539873146,1.245544601  
C,0,0.4411469015,-3.1147056328,0.7272541206  
H,0,2.2720228996,-4.0455879412,1.4589562929

H,0,1.0352968125,-3.8109833446,2.6946593715  
H,0,3.1578507077,-1.9195434671,2.096395776  
H,0,1.8191706592,-1.708442208,3.2030912619  
H,0,1.0298054698,-0.0764049568,1.8056117268  
H,0,-0.4714328175,-3.6963422661,0.8818794691  
H,0,0.8209925379,-3.3546945331,-0.2761373172  
N,0,0.1685101501,-1.6835833069,0.8395979034  
C,0,2.2093231159,-0.374795637,0.0550607565  
C,0,2.6227547737,-1.4708482592,-0.9292674989  
C,0,3.6007232106,-2.4157106963,-0.5895305359  
C,0,2.0114776636,-1.5921739763,-2.1789763387  
C,0,3.9270121826,-3.4584176696,-1.449421282  
H,0,4.1333260671,-2.3348342754,0.3550502668  
C,0,2.337584322,-2.6333530733,-3.0465567736  
H,0,1.2660934931,-0.8669725601,-2.4921383224  
C,0,3.2899749743,-3.5782355607,-2.6826550786  
H,0,4.6909842981,-4.1748999824,-1.155221862  
H,0,1.8394678815,-2.7001771836,-4.0111446814  
H,0,3.5449840677,-4.3926307064,-3.3566722385  
C,0,3.4074816331,0.4141223097,0.5992878191  
C,0,4.6190470706,0.4691720146,-0.098270429  
C,0,3.288164032,1.1777391843,1.768601844  
C,0,5.6809813206,1.2449139794,0.3596495348  
H,0,4.7404342047,-0.0922084874,-1.0221933119  
C,0,4.3525173764,1.9437086776,2.2340506598  
H,0,2.3473857726,1.2183493928,2.3135519994  
C,0,5.5553412199,1.9796855972,1.5343815002  
H,0,6.6093737635,1.2703966917,-0.2067613732  
H,0,4.2310670606,2.5263839375,3.144598094  
H,0,6.3854070644,2.5812816572,1.8978666901  
Si,0,1.5244744351,2.0317234148,-1.3621095444  
O,0,1.3049120871,0.5245754281,-0.600198633  
C,0,2.9179546913,2.0135796532,-2.6114306213  
H,0,2.9294016514,1.0971016391,-3.2151140659  
H,0,2.7709021127,2.8567827127,-3.301032621  
H,0,3.9051914273,2.1365657105,-2.1517239111  
C,0,1.7460943537,3.4095289794,-0.1208417953  
H,0,2.8008376231,3.5726404278,0.1342927411  
H,0,1.3575715926,4.3468094123,-0.5452358809  
H,0,1.2007020477,3.2021787776,0.8102271724  
C,0,-0.0914533378,2.2361385916,-2.2821881967  
H,0,-0.9802811575,2.2804059658,-1.6362664295  
H,0,-0.058222359,3.1841731958,-2.8369328498  
H,0,-0.2530009652,1.4476773431,-3.0307760672

C,0,-0.9995314982,-1.0549455255,0.6364935642  
H,0,-0.9739761055,-0.0309116717,1.0129901337  
C,0,-2.3274517481,-1.7425140473,0.8426094808  
H,0,-2.3208864219,-2.6257983124,0.1916768636  
C,0,-2.4210309811,-2.2541912338,2.294799947  
H,0,-3.4361534861,-2.6551133733,2.4277910786  
H,0,-1.7437626782,-3.109714052,2.4284627996  
C,0,-4.602775354,-1.5820959493,-0.434837316  
O,0,-5.2241482532,-0.5254339648,-1.1984689633  
C,0,-3.3707569512,0.4614907336,-0.2652416559  
C,0,-3.5663410799,-0.854780137,0.477760414  
H,0,-4.0719317925,-0.6415926346,1.4354033159  
C,0,-4.4651969807,0.6174052693,-1.2076077312  
O,0,-4.7930454947,1.5416247869,-1.9233665033  
C,0,-4.0260819561,-2.5436597797,-1.4666104368  
H,0,-3.7045217488,-3.4934836191,-1.0229023416  
H,0,-4.8122859108,-2.7725798699,-2.194962376  
H,0,-3.1807119507,-2.1061162507,-2.0113248357  
C,0,-5.6951512838,-2.2639832163,0.3635706608  
H,0,-6.4499436342,-2.6968858726,-0.3042395577  
H,0,-5.2758699702,-3.0751086381,0.973619811  
H,0,-6.1924601376,-1.5503110412,1.0304889358  
C,0,-2.8315645559,1.5860503123,0.4346729574  
O,0,-2.3198756931,1.5136053906,1.5670843411  
O,0,-2.851170216,2.7582252968,-0.2281555792  
C,0,-2.2032187121,3.8635199297,0.4108280313  
H,0,-2.6801066846,4.06003007,1.3797272486  
H,0,-1.1518044503,3.6027881625,0.6105036176  
C,0,-2.307760301,5.0449311255,-0.5152831569  
H,0,-1.821957109,5.9177926631,-0.06442705  
H,0,-1.819629666,4.8366905708,-1.4747371077  
H,0,-3.3547153757,5.2952728029,-0.7169505339  
C,0,-2.1326164199,-1.2246232745,3.378040665  
H,0,-2.7398481879,-0.3203050797,3.2596502883  
H,0,-2.3332320844,-1.6476867018,4.3689339138  
H,0,-1.0805633946,-0.9074415227,3.3656429949  
O,0,-1.1073991668,-0.6785884607,-1.0799404512  
H,0,-1.9443689783,-0.0682978338,-1.078819882  
H,0,-0.2976863715,-0.1248305672,-1.1661610298  
O,0,0.1256143342,1.930497014,2.759133456  
H,0,-0.7650366649,1.8768121022,2.3536923412  
H,0,-0.0283072837,2.2073902908,3.6678980881

-----

**dr1-TS-Hyd-water**

E(RM06)= -2156.78838550 Hartree

Sum of electronic and thermal Free Energies= -2156.094885 Hartree

C,0,-1.5075643474,-2.8176971067,-1.8730637072  
C,0,-2.5476253186,-2.0670997197,-1.0557596558  
C,0,-1.7167261613,-1.2385407763,-0.0676992416  
C,0,-0.5065043297,-3.205662901,-0.8052414233  
H,0,-1.9185183547,-3.6834870657,-2.4020966653  
H,0,-1.043992651,-2.1532439921,-2.6158108366  
H,0,-3.185527569,-2.785218664,-0.528445726  
H,0,-3.20150215,-1.4424798491,-1.668519664  
H,0,-1.4637956078,-0.2764119933,-0.5407532129  
H,0,0.4854825783,-3.4546337322,-1.1927911306  
H,0,-0.8828471504,-4.0684144601,-0.2391221943  
N,0,-0.4542615218,-2.0175671948,0.0712467687  
C,0,-2.3567543159,-0.89401872,1.314845771  
C,0,-2.3209408927,-2.1232508204,2.2278417182  
C,0,-3.1963019902,-3.1991316484,2.0369618651  
C,0,-1.3964689411,-2.2089530188,3.2699416399  
C,0,-3.1241604467,-4.3357692118,2.8369211512  
H,0,-3.9743627357,-3.1450529595,1.2785976123  
C,0,-1.3254789934,-3.3423047232,4.0772872821  
H,0,-0.7312397165,-1.3687891075,3.4537232902  
C,0,-2.1821561855,-4.4164092084,3.8596434963  
H,0,-3.8201594568,-5.154742993,2.6680216054  
H,0,-0.5927132846,-3.3812060602,4.8814729564  
H,0,-2.1277620669,-5.3018484949,4.4889308616  
C,0,-3.7796368497,-0.3395200771,1.1821747924  
C,0,-4.6461157024,-0.4012023171,2.279489831  
C,0,-4.215439459,0.3475954825,0.0448007321  
C,0,-5.9111084723,0.1745750664,2.2335940931  
H,0,-4.3233546937,-0.9031606838,3.1897052098  
C,0,-5.482585871,0.9241524725,-0.0078942115  
H,0,-3.5636043702,0.4606873825,-0.8179860975  
C,0,-6.3394617718,0.8339918167,1.0842879811  
H,0,-6.5635019393,0.1082097027,3.1014038923  
H,0,-5.795475235,1.4493048884,-0.907703463  
H,0,-7.3296995409,1.2818402899,1.0437866147  
Si,0,-1.4877463011,1.7838337212,1.8224883769  
O,0,-1.5303065692,0.0979131933,1.9167172194  
C,0,-3.0244208835,2.6112521296,2.5001869223  
H,0,-3.2583206404,2.2576477442,3.5124108112  
H,0,-2.8206907787,3.6895456953,2.568646572  
H,0,-3.9151412944,2.4829332153,1.8747818952  
C,0,-1.1541299297,2.3699698637,0.0736194494

H,0,-1.9951526715,2.2088830073,-0.6123550949  
H,0,-0.9620706947,3.4518865273,0.0997158143  
H,0,-0.2576034378,1.9024863836,-0.3566494954  
C,0,-0.0475940267,2.2613866634,2.9063673065  
H,0,0.9208244525,2.0163979882,2.4523971144  
H,0,-0.0648117101,3.3491992378,3.0603335667  
H,0,-0.1062410263,1.7859842328,3.8940776931  
C,0,0.7093837879,-1.3467401104,0.2759158947  
H,0,0.5413715691,-0.4332866993,0.8538950223  
C,0,1.9951230312,-2.084259064,0.6335507987  
H,0,2.2736218042,-2.7009858202,-0.2362381469  
C,0,1.8268957416,-3.0462342951,1.830640879  
H,0,2.8061400408,-3.0992575343,2.3276786677  
H,0,1.135194879,-2.6216486807,2.5663747001  
C,0,3.2905045017,-0.1997561618,2.0855101213  
O,0,3.0985929762,1.1310666131,1.540742345  
C,0,3.5652919228,-0.1838170567,-0.2662861013  
C,0,3.2304439063,-1.1551120717,0.850913145  
H,0,4.0542598174,-1.8773900771,0.9599955827  
C,0,3.5004183803,1.1755044857,0.2240269723  
O,0,3.655386145,2.2504158843,-0.3199054525  
C,0,2.2720625974,-0.3354820487,3.2007719058  
H,0,2.4305478524,-1.251858224,3.7779481593  
H,0,2.397664621,0.5128926774,3.8842674244  
H,0,1.2368074009,-0.3155868246,2.8418342648  
C,0,4.6930892638,-0.2407019613,2.6768974797  
H,0,4.8110533552,0.548384377,3.4289912657  
H,0,4.8822284299,-1.2106086982,3.1553072044  
H,0,5.451327692,-0.0886071961,1.8987348487  
C,0,4.2888077693,-0.6358412008,-1.4068774596  
O,0,4.3856190739,-1.8371381867,-1.7268885948  
O,0,4.8378581922,0.3251688642,-2.1709516901  
C,0,5.4925381095,-0.0988494027,-3.3705804869  
H,0,6.2720799006,-0.8304435448,-3.1235669129  
H,0,4.7651462664,-0.6052427454,-4.0217903591  
C,0,6.0635059082,1.12875869,-4.0283933616  
H,0,6.5832341566,0.8527888651,-4.9527653391  
H,0,5.2747563354,1.8472629841,-4.2758899012  
H,0,6.7800906756,1.6282441954,-3.3674872339  
C,0,1.3856082191,-4.4670527022,1.5187454691  
H,0,1.9598601449,-4.9020796239,0.6897408451  
H,0,1.5399213578,-5.1066111235,2.3962129871  
H,0,0.3214452744,-4.529908413,1.272519833  
O,0,1.0987174568,-0.5509435777,-1.2011302394



H,0,2.0546462949,-0.1883613995,-0.9988668907  
H,0,1.2661732002,-1.2415137609,-1.897208892  
O,0,2.0234806925,-2.4599470242,-2.9002814322  
H,0,2.9594130818,-2.4005966703,-2.5954595728  
H,0,2.0397952681,-2.4164084118,-3.8621745652

-----

**dr2-TS-Hyd-water**

E(RM06)= -2156.78229860 Hartree

Sum of electronic and thermal Free Energies= -2156.091334 Hartree

C,0,-1.4803644461,2.0235207301,3.2083725363  
C,0,-2.3649168036,0.802818502,2.8993952447  
C,0,-1.8001542302,0.1463089597,1.6355621192  
C,0,-0.2405167832,1.8780410867,2.32238033  
H,0,-1.9967058311,2.9631851048,2.9874748878  
H,0,-1.210988965,2.0489707171,4.2700877611  
H,0,-3.4229745691,1.0623242065,2.7969782622  
H,0,-2.298003601,0.0752850697,3.7183926632  
H,0,-1.8021274422,-0.948433184,1.7291732973  
H,0,0.7034739491,1.9375443112,2.8700792844  
H,0,-0.2108711512,2.6531574625,1.5432794711  
N,0,-0.3889418137,0.5624983238,1.68941389  
C,0,-2.5055582857,0.4297464019,0.2764516206  
C,0,-2.4212986163,1.9128640635,-0.0868265821  
C,0,-3.2438559682,2.8593894261,0.5346446126  
C,0,-1.4861972759,2.3583119578,-1.0227112431  
C,0,-3.1136943515,4.2154517822,0.2516049673  
H,0,-4.0087350776,2.5380160312,1.2400438011  
C,0,-1.3580293046,3.7154597845,-1.3127788788  
H,0,-0.8426514467,1.6310130381,-1.5100344975  
C,0,-2.1638635565,4.6508274934,-0.670508898  
H,0,-3.7644431677,4.9332669907,0.746585144  
H,0,-0.6225560305,4.039115822,-2.0466423105  
H,0,-2.0643934442,5.7103671653,-0.8955765748  
C,0,-3.9544786047,-0.0723447411,0.2787129112  
C,0,-4.8453741986,0.4088419185,-0.6873873622  
C,0,-4.4020632446,-1.0847141437,1.1340948564  
C,0,-6.1344245273,-0.1021519206,-0.7995827513  
H,0,-4.5246136281,1.1945834168,-1.3693804596  
C,0,-5.6958267706,-1.5911974594,1.0335359107  
H,0,-3.7479663592,-1.5041215657,1.8951109775  
C,0,-6.5672752616,-1.104643747,0.064150017  
H,0,-6.8021425853,0.2884197232,-1.5645114802  
H,0,-6.0187339082,-2.3757418814,1.7142731118  
H,0,-7.5757389471,-1.5033949614,-0.0176867844

Si,0,-1.9630655474,-1.3172393956,-1.9678615899  
O,0,-1.7381979281,-0.3215681072,-0.6360786398  
C,0,-2.8813249318,-0.4723213736,-3.3660279913  
H,0,-2.5234148632,0.5526624673,-3.5286495209  
H,0,-2.7036769795,-1.0313615985,-4.2953943571  
H,0,-3.9654651715,-0.4380157766,-3.2059882849  
C,0,-2.8426286926,-2.8932221104,-1.467776969  
H,0,-3.9120360004,-2.7400003167,-1.2749855267  
H,0,-2.7514173,-3.6429089793,-2.2655843544  
H,0,-2.3907335091,-3.3225327466,-0.5624971833  
C,0,-0.2064826532,-1.6683437213,-2.4779161417  
H,0,0.3650833147,-2.1858434294,-1.6945882413  
H,0,-0.1663576889,-2.3043829324,-3.3720741121  
H,0,0.3252566477,-0.7375425489,-2.714983115  
C,0,0.60864205,-0.1517030005,1.1569449996  
H,0,0.2342747628,-1.022743391,0.6177754351  
C,0,1.9268897887,-0.3651919273,1.8766285464  
H,0,2.4060238464,0.6098178764,2.0519481164  
C,0,1.6311706987,-1.010133583,3.2562328577  
H,0,0.7400930541,-1.6518580767,3.1925932887  
H,0,2.4678577989,-1.6868349161,3.4790724852  
C,0,2.742575287,-2.702815638,0.7538372721  
O,0,2.6304023457,-2.73249762,-0.6871347506  
C,0,3.4914392373,-0.6749967419,-0.2132071374  
C,0,3.0035697607,-1.2009224136,1.1176822684  
H,0,3.8403907235,-1.1872631644,1.83514279  
C,0,3.2715500656,-1.6461548997,-1.2523170358  
O,0,3.4844003338,-1.6409664559,-2.4496237102  
C,0,3.9746296027,-3.518941661,1.1236078118  
H,0,4.0863248928,-3.5816546863,2.2141860895  
H,0,3.8910952335,-4.5357785521,0.7217644946  
H,0,4.8821682013,-3.061144928,0.7112833818  
C,0,1.5050759978,-3.420233005,1.2654860332  
H,0,1.4628382215,-4.4041718978,0.7831136616  
H,0,1.5463217865,-3.5838079298,2.3468334555  
H,0,0.5680068465,-2.9068549753,1.0208124948  
C,0,4.3288295224,0.4664744906,-0.2747847213  
O,0,4.5174985618,1.2411692238,0.6872977658  
O,0,4.8975173997,0.713096932,-1.4735277882  
C,0,5.7036534427,1.8880764677,-1.5750121297  
H,0,5.0982448714,2.7730157428,-1.3297874615  
H,0,6.5179385957,1.8397605051,-0.8404656676  
C,0,6.2267728335,1.9554817666,-2.9850562658  
H,0,6.8585857971,2.8422671771,-3.1093401195

H,0,6.8253603254,1.0695799178,-3.2227994689  
H,0,5.4052933682,2.0118637978,-3.7076372706  
C,0,1.4731657481,-0.0612069263,4.4342482439  
H,0,0.5252471145,0.4877330266,4.4137427305  
H,0,1.4919399134,-0.6228269119,5.3755964344  
H,0,2.2905489182,0.6705186325,4.4720576726  
O,0,1.1360398077,0.7413805154,-0.3666573244  
H,0,1.9870546342,0.2636813816,-0.6090819849  
H,0,1.451777306,1.6328177552,-0.068248657  
O,0,2.4044498409,2.9502035875,0.6267390237  
H,0,3.2784569079,2.5057424234,0.7279634419  
H,0,2.5617348266,3.7721611058,0.1505846705

-----

### **TS-Decom**

E(RM06)= -2156.80044977 Hartree

Sum of electronic and thermal Free Energies= -2156.105657 Hartree

C,0,-1.3012663874,-1.0816843169,-1.5516706193  
H,0,-1.4424844029,-1.5019459607,-2.5608973832  
C,0,-2.1589298268,-1.8871128101,-0.5360574604  
H,0,-1.4995918493,-2.1143772719,0.3146156383  
C,0,-2.5782768327,-3.2122077787,-1.214797803  
H,0,-1.69743902,-3.6624196003,-1.6955835846  
H,0,-2.8917900141,-3.9430525065,-0.4563091148  
C,0,-4.0218785332,-1.9295006426,1.2612785796  
O,0,-4.6373917591,-0.8783109787,2.0646703185  
C,0,-3.1856421186,0.2487157518,0.6130543482  
C,0,-3.3855375152,-1.1641025513,0.0568862702  
H,0,-4.1640786993,-1.0721465202,-0.7136887049  
C,0,-4.1411609937,0.3328912162,1.7886177977  
O,0,-4.4570209631,1.3199788579,2.4042699275  
C,0,-5.1650903125,-2.8549784708,0.8974580358  
H,0,-4.8161393537,-3.7318530606,0.3426431486  
H,0,-5.6552115109,-3.2106666324,1.8114115507  
H,0,-5.912266958,-2.3292308843,0.2919571463  
C,0,-3.022671364,-2.6137866887,2.1790307736  
H,0,-3.5353074023,-2.9370739442,3.0924624155  
H,0,-2.580372064,-3.5009147667,1.7090169888  
H,0,-2.2115699736,-1.9321197869,2.4685107975  
C,0,-3.5908371191,1.3366544097,-0.3618167086  
O,0,-4.5084537296,1.2279131833,-1.1471224402  
O,0,-2.8727170963,2.4419963973,-0.1951361859  
C,0,-3.1700314239,3.532280709,-1.0843427744  
H,0,-3.0653837767,3.173541845,-2.1163503508  
H,0,-4.2140792888,3.8347777122,-0.9376750035

C,0,-2.2073121876,4.6434923483,-0.768312951  
H,0,-2.3936318114,5.4985674499,-1.4272407945  
H,0,-2.3206832974,4.9782851384,0.2684295494  
H,0,-1.1713352823,4.3169129097,-0.9132508429  
C,0,-3.6616412071,-3.0810263686,-2.2792725641  
H,0,-3.4384069493,-2.2824135248,-2.9993555566  
H,0,-3.75623525,-4.0143599499,-2.8456892325  
H,0,-4.6471147506,-2.85982026,-1.8558380932  
O,0,-1.5082110565,0.2649488079,-1.6113789082  
H,0,-0.9805594234,0.6746265089,-0.8037927345  
H,0,-2.1651665269,0.4487811367,0.9789781708  
O,0,-0.0337389108,0.6772584259,0.329026498  
H,0,0.3438618656,-0.5310217602,-0.4033610823  
H,0,0.5468756985,1.4427760007,0.3473999824  
C,0,3.3040383561,-4.5759399811,1.0070624213  
C,0,2.0471978164,-4.2076451199,0.5183653777  
C,0,1.06661236,-5.2060306852,0.4336219564  
C,0,1.340157825,-6.5212239962,0.7937953307  
C,0,2.6019125001,-6.8718245739,1.266557771  
C,0,3.5802608621,-5.8901767179,1.3784505611  
C,0,1.6910625582,-2.7384652286,0.2333690885  
O,0,0.9243417772,-2.2453612415,1.3084673001  
Si,0,1.0661344233,-2.2866982496,2.9878337241  
C,0,0.330489661,-3.8789719875,3.6463708791  
C,0,0.6973113898,-2.6723662632,-0.9660207344  
C,0,1.1826142237,-3.2207935533,-2.3145357804  
C,0,1.1937788618,-2.0337941864,-3.2899874787  
C,0,1.0234265948,-0.8047601507,-2.411512578  
N,0,0.2222739061,-1.2772530473,-1.2411316839  
H,0,0.510562874,-4.0157418302,-2.6602114871  
C,0,2.9074883656,-1.841459195,-0.0176986265  
C,0,3.9508567277,-2.2218297243,-0.872765215  
C,0,4.9925027323,-1.3478289304,-1.169341281  
C,0,5.0185202095,-0.0719056298,-0.6114207351  
C,0,3.9945037796,0.3147956157,0.247062596  
C,0,2.9500777747,-0.5602308908,0.5379162067  
C,0,2.8310623666,-2.1667721147,3.6080542003  
C,0,0.0923317661,-0.779167721,3.5261197177  
H,0,-0.1642369867,-3.2279126468,-0.6095446606  
H,0,3.9706358633,-3.2179441515,-1.309363487  
H,0,5.7906541258,-1.6711404412,-1.8340444074  
H,0,5.8330654642,0.6113439935,-0.8406073764  
H,0,3.9987300177,1.3078222645,0.6916842688  
H,0,2.1298784019,-0.2258968791,1.1693227337

H,0,0.0558310544,-4.9702204985,0.1032710403  
H,0,0.5577785159,-7.2724922188,0.7121631605  
H,0,2.8166727959,-7.8989717735,1.5519523653  
H,0,4.5680211335,-6.1421949815,1.7579490532  
H,0,4.0855234843,-3.8274149407,1.1119187049  
H,0,3.4598514634,-3.0056074503,3.2861440273  
H,0,3.3257441707,-1.2322176768,3.3173061869  
H,0,2.7971607124,-2.1919727073,4.7070381088  
H,0,0.7168926142,-0.1141793824,4.1380374356  
H,0,-0.2225907104,-0.2064179363,2.6397472528  
H,0,-0.7920243326,-1.0342512613,4.1240082411  
H,0,0.9626475252,-4.7485694263,3.4225819078  
H,0,0.2305790304,-3.8124804678,4.7387190602  
H,0,-0.6698277508,-4.0713639069,3.2366318338  
H,0,1.9823846631,-0.4368918773,-2.0305039534  
H,0,0.4998287954,0.0302182716,-2.8831277679  
H,0,2.1685784943,-3.6843162404,-2.2197844623  
H,0,0.3664826679,-2.1123707486,-4.0055973349  
H,0,2.1184027328,-1.9779771967,-3.873789506

-----

#### 4aa

E(RM06)= -883.106895795 Hartree

Sum of electronic and thermal Free Energies= -882.836736 Hartree

C,0,1.4325131469,1.5352420991,0.3451498745  
O,0,0.3397443877,2.4914861976,0.1449833379  
C,0,-0.3007825108,0.5571510928,-0.9897290387  
C,0,0.7572659063,0.1755817365,0.0427609772  
H,0,0.225959968,-0.1354921044,0.9581758024  
C,0,-0.6399261975,1.9929955947,-0.6177866578  
O,0,-1.6183763291,2.6201835679,-0.9294354515  
C,0,1.8597216885,1.7110649761,1.7856000351  
H,0,2.6963468877,1.0507704649,2.0353088762  
H,0,2.1815214698,2.7445636065,1.9576166574  
H,0,1.0293867888,1.4915547875,2.4662728564  
C,0,2.5315006198,1.9201241111,-0.626912402  
H,0,2.818953411,2.9634096437,-0.4559242524  
H,0,3.4226092166,1.2975589671,-0.4873281283  
H,0,2.2074222075,1.8284445375,-1.6705717015  
C,0,-1.5455178182,-0.3008711666,-0.9847833216  
O,0,-1.960285472,-0.8773408553,-0.0018313109  
O,0,-2.1154659342,-0.3314105455,-2.18039947  
C,0,-3.3101981727,-1.1356218997,-2.3040515237  
H,0,-3.0486128506,-2.1703064158,-2.0502797299  
H,0,-4.0448941988,-0.7810356397,-1.5722747899

C,0,-3.799871471,-0.9990088703,-3.7179380902  
H,0,-4.7063529516,-1.5983312408,-3.8542059167  
H,0,-4.0412161959,0.0433777874,-3.9515364475  
H,0,-3.0478575249,-1.3507242876,-4.4322712815  
H,0,0.110354779,0.5730961182,-2.010944919  
C,0,1.6701426126,-0.9750841099,-0.405713661  
H,0,2.1581679792,-0.7087098116,-1.3573198037  
C,0,2.7201753183,-1.3824774859,0.6316207009  
H,0,2.2152203675,-1.6013261408,1.5859994403  
H,0,3.3896019664,-0.5354238261,0.8253344891  
C,0,3.5453488876,-2.5788000104,0.1820373476  
H,0,4.336691418,-2.8076541664,0.9036220854  
H,0,2.9365759808,-3.4858602453,0.0711623157  
H,0,4.0228276059,-2.3866196723,-0.7874593799  
C,0,0.7923387914,-2.172148806,-0.6862353494  
H,0,0.4012907562,-2.6876018469,0.2241775866  
O,0,0.5028769658,-2.5694018212,-1.7925886656

-----

**Cat**

E(RM06)= -1197.30062441 Hartree

Sum of electronic and thermal Free Energies= -1196.930423 Hartree

C,0,1.3080912673,-2.965862599,-1.9501142569  
C,0,1.8856223028,-1.7223837783,-2.6251555325  
N,0,1.4960198905,-0.6444338095,-1.7212931424  
C,0,0.1107940889,-0.9200627032,-1.3589795423  
C,0,0.1077085479,-2.4404289471,-1.1401099299  
H,0,1.024684354,-3.7291876632,-2.6823870784  
H,0,2.0520023383,-3.4174493174,-1.2829724663  
H,0,1.4425171606,-1.5970530043,-3.6317459623  
H,0,2.9760445929,-1.7577159645,-2.7448175084  
H,0,-0.5830380515,-0.6887164799,-2.1924933292  
H,0,0.2304918083,-2.66320065,-0.0739194242  
H,0,-0.8450804268,-2.879399204,-1.4556614325  
C,0,-0.3423616652,-0.1144828738,-0.1239753313  
C,0,-0.3960240812,1.398486488,-0.3646914306  
C,0,-0.3055955294,1.9952570542,-1.622054766  
C,0,-0.3499199102,3.383541028,-1.7599383074  
C,0,-0.503488439,4.1949637522,-0.6421726576  
C,0,-0.62679226,3.6076933143,0.6171873535  
C,0,-0.5757848237,2.2262402048,0.7498934276  
H,0,-0.2043533044,1.387657737,-2.5197418561  
H,0,-0.2664330054,3.8269932652,-2.7499080224  
H,0,-0.5364834132,5.2766777924,-0.7497585356  
H,0,-0.7636723811,4.230226112,1.4987713677

H,0,-0.6685570144,1.7695996112,1.7345441465  
C,0,-1.7462748826,-0.5896672651,0.2605557873  
C,0,-1.9699435075,-1.3100176165,1.4335218145  
C,0,-3.247400551,-1.7678388101,1.7520488463  
C,0,-4.3186233178,-1.5140920308,0.9013815272  
C,0,-4.1048233768,-0.7888624047,-0.2692739436  
C,0,-2.8306411712,-0.3272337642,-0.5827688479  
H,0,-1.1324773479,-1.5069705736,2.0976714597  
H,0,-3.4027661572,-2.3272362745,2.6724739353  
H,0,-5.315191928,-1.8719124327,1.1505421492  
H,0,-4.9354431062,-0.5738152103,-0.9383259725  
H,0,-2.6840578786,0.2571389936,-1.4907208189  
O,0,0.5116466684,-0.378775911,0.960506552  
Si,0,2.1333512246,-0.0992799727,1.2884169986  
C,0,2.1020079125,0.1833180557,3.1450363426  
H,0,3.1191864776,0.2918355992,3.5454609347  
H,0,1.6254809568,-0.6572528598,3.6666840564  
H,0,1.543821551,1.0933909248,3.4020162352  
C,0,2.896587932,1.420850907,0.4974714047  
H,0,2.2874297193,2.3222611469,0.643406  
H,0,3.0861290701,1.2990407696,-0.5741202211  
H,0,3.8653766242,1.5986644368,0.9871226397  
C,0,3.188377312,-1.6145829655,0.9698969551  
H,0,2.6948541364,-2.5260918753,1.3321216445  
H,0,4.1383460865,-1.5196564746,1.5148737599  
H,0,3.4150889233,-1.739683767,-0.0945439656  
H,0,1.616006584,0.2713100097,-2.1454830563

-----

**TS-HDA**

E(RM06)= -2003.97757424 Hartree

Sum of electronic and thermal Free Energies= -2003.331245 Hartree

C,0,-0.8911437115,1.5680460786,2.100524624  
C,0,0.5165314489,1.8293366904,1.558052627  
C,0,0.6896244929,0.8816533779,0.356472587  
C,0,-1.1619790616,0.12877066,1.6966279984  
H,0,-0.9618373112,1.7195274599,3.1821424632  
H,0,-1.6293130489,2.2275113856,1.6234274229  
H,0,1.2661163448,1.6228440185,2.3285495639  
H,0,0.6574419095,2.8752346769,1.2612566315  
H,0,0.659854354,1.4353635395,-0.5907018489  
H,0,-2.2254981301,-0.1083320029,1.6373691805  
H,0,-0.6809876252,-0.5783178637,2.3903913631  
N,0,-0.5073303117,0.0214805312,0.3821280213  
C,0,2.0054058747,0.0435596768,0.3203720018

C,0,1.9742723945,-0.9949384058,1.4434869418  
C,0,2.3219963751,-0.6808681314,2.7630822937  
C,0,1.486224076,-2.2779251891,1.1851148517  
C,0,2.1681197424,-1.6114437851,3.7877686687  
H,0,2.7371802438,0.2954616614,3.004724415  
C,0,1.3306820687,-3.2119969258,2.2056236452  
H,0,1.222095851,-2.544168148,0.1658081058  
C,0,1.6644215648,-2.8804055271,3.5157955235  
H,0,2.449125483,-1.3404256398,4.8031109625  
H,0,0.9458834807,-4.2027529402,1.9710057528  
H,0,1.5435073895,-3.6067711873,4.316156316  
C,0,3.2378886008,0.9503952829,0.3662752833  
C,0,4.4614744258,0.468446445,0.8435172889  
C,0,3.2111002569,2.2396936175,-0.1774851336  
C,0,5.6132942116,1.2487918646,0.7945310517  
H,0,4.5209491213,-0.5352175574,1.2598524067  
C,0,4.3577321117,3.0271364494,-0.2211889602  
H,0,2.2902786253,2.6471623037,-0.5895024407  
C,0,5.5653040146,2.5356503291,0.266496056  
H,0,6.5503121669,0.8474088981,1.1742896791  
H,0,4.3055046462,4.0274181315,-0.6451502441  
H,0,6.4622187002,3.1496828205,0.232446806  
Si,0,3.1035360918,-1.1607506563,-2.0319444159  
O,0,1.9490752788,-0.6136999637,-0.9389687414  
C,0,4.3506217044,-2.3325244714,-1.2692775655  
H,0,3.8731425885,-3.0802025905,-0.6230534185  
H,0,4.8573894088,-2.8755254312,-2.0799802765  
H,0,5.1249601559,-1.8191450132,-0.6876267784  
C,0,3.9884142129,0.2456038185,-2.8922024774  
H,0,4.7010864718,0.7655129085,-2.240822886  
H,0,4.552394748,-0.1578596078,-3.7448703346  
H,0,3.2813538852,0.9866797012,-3.2865376356  
C,0,2.080111867,-2.1073929007,-3.2809946419  
H,0,1.1964313232,-1.5427947963,-3.6065034344  
H,0,2.6838441151,-2.3195985751,-4.1738347088  
H,0,1.7430343186,-3.0720517415,-2.8805406357  
C,0,-1.1075863542,-0.3468662856,-0.7650592614  
H,0,-0.4030669684,-0.486435779,-1.5849208441  
C,0,-2.2681693476,-1.3197858949,-0.7056545952  
H,0,-2.195243404,-1.8155194734,0.2729911172  
C,0,-2.1099347834,-2.3921588375,-1.786296353  
H,0,-3.0562500721,-2.9474610804,-1.8649554442  
H,0,-1.9744586512,-1.8914340182,-2.758958581  
C,0,-4.8483946627,-1.2510693548,-0.0442081319



O,0,-5.2559418789,-0.2304573973,0.9049722441  
C,0,-3.6982555547,0.788978702,-0.3933706013  
C,0,-3.6556400136,-0.6330607822,-0.8380643257  
H,0,-3.8938800765,-0.6951787681,-1.9144476936  
C,0,-4.6582126293,0.9818008916,0.6550684566  
O,0,-4.9565161492,1.955933317,1.3190304968  
C,0,-6.0260007222,-1.4884420402,-0.9726803727  
H,0,-5.7984441132,-2.2898575069,-1.6880201267  
H,0,-6.9160500713,-1.77503888,-0.4003399044  
H,0,-6.2592654435,-0.5779597843,-1.5386225769  
C,0,-4.5518753843,-2.4915140035,0.7749235008  
H,0,-5.4663841076,-2.8177481212,1.2837886608  
H,0,-4.2041833478,-3.3187810451,0.142971414  
H,0,-3.7989275515,-2.298108524,1.54771819  
C,0,-2.7224818683,1.6301199551,-0.8686396684  
O,0,-1.7499246865,1.1460315987,-1.5704815647  
O,0,-2.7383957322,2.9393370728,-0.5949399332  
C,0,-1.6252416789,3.733528144,-1.0239790678  
H,0,-0.6857314038,3.2455892021,-0.7274778569  
H,0,-1.6284899522,3.7994457772,-2.1200650642  
C,0,-1.7700158466,5.0853008185,-0.379504773  
H,0,-0.9450487281,5.7382769881,-0.6854373397  
H,0,-2.7123570981,5.5611068721,-0.6708706255  
H,0,-1.7570883669,4.9998047025,0.7135144586  
C,0,-0.9733998606,-3.3610108015,-1.519655082  
H,0,-1.1226626492,-3.8877343936,-0.5658644777  
H,0,-0.8920208076,-4.1158663736,-2.310339151  
H,0,-0.0091253706,-2.8395936566,-1.4619933888

-----

#### **INT-HDA**

E(RM06)= -2003.98917102 Hartree

Sum of electronic and thermal Free Energies= -2003.342585 Hartree

C,0,-0.0710525148,1.3821313095,-3.0985070768  
C,0,-1.3184870273,1.5921339686,-2.247332679  
C,0,-1.0048786993,0.8729940128,-0.9287140083  
C,0,0.3561165227,-0.0172989626,-2.6848502468  
H,0,-0.2680326461,1.4711994131,-4.1725435877  
H,0,0.7097189912,2.1054166298,-2.8300977628  
H,0,-2.1790409678,1.1346827867,-2.7485714169  
H,0,-1.56125585,2.6479497682,-2.0860054876  
H,0,-0.6017773506,1.6003384948,-0.2099524976  
H,0,1.4098387032,-0.2351029503,-2.8893625473  
H,0,-0.2473006829,-0.7729301931,-3.2149393752  
N,0,0.0736684232,-0.090777184,-1.2422010494

C,0,-2.2031987137,0.1908743691,-0.2026291897  
C,0,-2.7427184575,-0.9590903732,-1.0539845113  
C,0,-3.640507791,-0.7449500288,-2.1082373826  
C,0,-2.2903619942,-2.2621963963,-0.838904507  
C,0,-4.0580090692,-1.7923963223,-2.9243867996  
H,0,-4.0430912157,0.2498377446,-2.2891136937  
C,0,-2.7118432131,-3.3153152224,-1.6474342049  
H,0,-1.592713102,-2.4504191343,-0.026470077  
C,0,-3.5931849391,-3.0854538326,-2.6989646635  
H,0,-4.7583691902,-1.595435121,-3.7332379197  
H,0,-2.3422216719,-4.3206160424,-1.4540950877  
H,0,-3.9214979363,-3.9063050969,-3.3325739677  
C,0,-3.2851437479,1.2091640425,0.1815035316  
C,0,-4.6140085261,0.8081778507,0.3624995065  
C,0,-2.9601932792,2.5340856284,0.4959822484  
C,0,-5.5830485346,1.6958404073,0.8221493586  
H,0,-4.9024295777,-0.218383112,0.1466382103  
C,0,-3.9266441794,3.428600665,0.9468360043  
H,0,-1.9361720809,2.8884531039,0.4062031832  
C,0,-5.2451581804,3.014424174,1.1111406959  
H,0,-6.6070329713,1.3520064804,0.9524763485  
H,0,-3.6421979551,4.4528737761,1.1778363891  
H,0,-6.000820336,3.7116691213,1.4655721296  
Si,0,-2.1779402762,-0.7018724935,2.5204350509  
O,0,-1.6200881702,-0.3261787304,0.9851044614  
C,0,-3.7438562351,-1.7326068328,2.5314143719  
H,0,-3.7334807295,-2.5153668438,1.7623130561  
H,0,-3.8312930513,-2.2299762455,3.5077346317  
H,0,-4.6474706268,-1.1273955043,2.3931679405  
C,0,-2.4255073159,0.8376125268,3.5551192865  
H,0,-3.3159833074,1.4042720927,3.255100762  
H,0,-2.5505448613,0.5593027979,4.610811836  
H,0,-1.5589388536,1.5082979826,3.4893218549  
C,0,-0.7654029431,-1.7151817143,3.2118898235  
H,0,0.1842422242,-1.1663906498,3.1625797723  
H,0,-0.9459837268,-1.9669801959,4.2654738686  
H,0,-0.6420514064,-2.6590525218,2.6642007284  
C,0,1.1732914997,-0.0494565793,-0.3603471006  
H,0,0.7806684603,0.0228937526,0.6643890924  
C,0,2.1719759566,-1.2080485775,-0.4193551668  
H,0,2.6821060424,-1.1803108805,-1.3963812433  
C,0,1.4613321327,-2.5544887528,-0.2408863362  
H,0,2.1378176081,-3.2407117794,0.2849471235  
H,0,0.6024582047,-2.4133720954,0.4346729521

C,0,4.5183459645,-1.7654032586,0.7077370659  
O,0,5.4844843726,-0.8330678467,1.2787144965  
C,0,3.7391378863,0.450632216,0.6127767289  
C,0,3.2015275671,-0.9459444519,0.6819761595  
H,0,2.6953455833,-1.1226105216,1.6511160537  
C,0,5.1040346071,0.4682317372,1.0909590382  
O,0,5.8688689944,1.3784770937,1.3268572366  
C,0,4.50314725,-2.9565475201,1.6416486631  
H,0,3.8641142495,-3.7597650752,1.2573883155  
H,0,5.5178166511,-3.3577918881,1.7491519146  
H,0,4.1421464529,-2.6693414191,2.6360941812  
C,0,5.028340747,-2.1478221202,-0.6692333519  
H,0,6.0369294497,-2.5678083575,-0.5812833399  
H,0,4.3843194891,-2.9033250806,-1.1367560817  
H,0,5.0827206818,-1.2760440682,-1.3328816065  
C,0,3.0754726886,1.4397387367,-0.0393566293  
O,0,1.8859891472,1.2478212635,-0.5947818059  
O,0,3.573466939,2.6582461518,-0.1891509022  
C,0,2.8624393426,3.6189600899,-0.9897013029  
H,0,2.8277412581,3.2621849612,-2.0280217621  
H,0,1.8307559649,3.7083328596,-0.6255021104  
C,0,3.6073834951,4.9199021625,-0.8747253999  
H,0,3.108144701,5.6881695315,-1.4750142637  
H,0,3.6396844398,5.2607844966,0.1653563513  
H,0,4.6368577365,4.8166445728,-1.2329056136  
C,0,1.0107094647,-3.211160317,-1.5341701519  
H,0,1.8582914857,-3.3554092922,-2.2188619283  
H,0,0.573929533,-4.199045508,-1.3433649614  
H,0,0.2551691839,-2.6118708566,-2.053070371

-----

### TS-2+2

E(RM06)= -2003.98177027 Hartree

Sum of electronic and thermal Free Energies= -2003.337449 Hartree

C,0,0.6804471922,-0.3614844744,-3.0321983006  
C,0,-0.6410952807,0.2283288174,-2.5474800461  
C,0,-0.5864987466,0.1359172131,-1.0202895482  
C,0,0.9388228844,-1.4729449439,-2.0340446229  
H,0,0.6287603581,-0.7330925062,-4.0593733854  
H,0,1.4899283978,0.3797414305,-2.9701910518  
H,0,-1.4791562541,-0.3545903494,-2.9433912042  
H,0,-0.7766701991,1.2627098327,-2.8758077574  
H,0,-0.2332287061,1.079490021,-0.5861225094  
H,0,1.979393256,-1.7965422242,-1.9849285685  
H,0,0.2923164933,-2.3464622307,-2.2029672051

N,0,0.5232732855,-0.8425290079,-0.7645245462  
C,0,-1.886289844,-0.2423262129,-0.2508152798  
C,0,-2.3546809312,-1.6413334542,-0.6597920974  
C,0,-3.0942771454,-1.8662683626,-1.8267345806  
C,0,-1.9897626878,-2.7457594392,0.1131674887  
C,0,-3.4227878712,-3.1587876751,-2.2259290162  
H,0,-3.4411988377,-1.0249852557,-2.4239588837  
C,0,-2.316878718,-4.0403111012,-0.2830206608  
H,0,-1.4526547033,-2.5811406458,1.0440405452  
C,0,-3.0270998978,-4.2531422003,-1.4604034083  
H,0,-4.0000442369,-3.3086213276,-3.1355666067  
H,0,-2.0186551022,-4.8830922881,0.3376053458  
H,0,-3.2854274139,-5.2624836001,-1.7721333994  
C,0,-2.9640628518,0.824089409,-0.4556604763  
C,0,-4.2830668564,0.5277371701,-0.0948408224  
C,0,-2.672599613,2.1263725818,-0.8715198272  
C,0,-5.2782044562,1.4977784005,-0.1488810445  
H,0,-4.5353681215,-0.4778883169,0.2384414226  
C,0,-3.668048465,3.0982665732,-0.9380675194  
H,0,-1.6595381464,2.4160102332,-1.1406579134  
C,0,-4.9745937411,2.789063519,-0.5747756109  
H,0,-6.2949350109,1.2418537626,0.1410115267  
H,0,-3.411224961,4.102694421,-1.268224227  
H,0,-5.751512917,3.5485309921,-0.6221031046  
Si,0,-1.9173127354,0.3900434322,2.5819498958  
O,0,-1.4954384436,-0.2870823175,1.1010056552  
C,0,-3.5523044771,-0.3007609198,3.1829172711  
H,0,-3.6402571992,-1.3716275851,2.9555830078  
H,0,-3.6241888927,-0.1880468591,4.2732705657  
H,0,-4.4134951317,0.2158959449,2.7420562371  
C,0,-1.9280557782,2.2545393067,2.5485097308  
H,0,-2.7282946924,2.6760941717,1.9276593352  
H,0,-2.0635261338,2.6352786507,3.5704406683  
H,0,-0.9579826273,2.6228836675,2.1862152071  
C,0,-0.5165364568,-0.2135164354,3.6632811503  
H,0,0.4252152081,0.2686055399,3.3635861659  
H,0,-0.6934336121,0.0383258717,4.7171232531  
H,0,-0.3979894407,-1.3043120945,3.5968559981  
C,0,1.1961275496,-0.8233652578,0.335733262  
H,0,0.7932425296,-0.1832149761,1.1221346885  
C,0,2.498962206,-1.4648848398,0.6220345162  
H,0,2.7997265809,-2.1015269915,-0.2190196881  
C,0,2.4252724578,-2.3103321056,1.894263052  
H,0,3.4508275239,-2.5626746992,2.1947307535

H,0,2.0162424566,-1.6884736802,2.705997886  
C,0,4.8910460488,-0.5407437562,0.1646041153  
O,0,4.760079074,-0.1517752127,-1.2209167263  
C,0,3.0786871385,0.9172215437,-0.1056076191  
C,0,3.4901379275,-0.2546094939,0.7516600532  
H,0,3.5616938647,0.0035365962,1.8198776138  
C,0,3.7883468047,0.8431929411,-1.3422414068  
O,0,3.6846079074,1.4247159217,-2.4108551606  
C,0,5.9215721536,0.3641276781,0.8267817863  
H,0,6.105288199,0.0477315866,1.8615854375  
H,0,6.8680139415,0.3149544726,0.2754446293  
H,0,5.5836238669,1.4064202495,0.8394419119  
C,0,5.3927274636,-1.9701335741,0.183217069  
H,0,6.3656425448,-2.0155156445,-0.3202247447  
H,0,5.5341270544,-2.3216828018,1.2127661818  
H,0,4.7263914161,-2.6657555389,-0.3390119341  
C,0,2.1303137737,1.873129337,0.3207224194  
O,0,1.5489605977,1.8601145588,1.4217726722  
O,0,1.8326078844,2.8407900733,-0.5955405414  
C,0,0.8529798697,3.7977486732,-0.2041049273  
H,0,-0.026331506,3.2853254581,0.2158369246  
H,0,1.2531620163,4.435640785,0.5966657341  
C,0,0.4865343503,4.6011745086,-1.4245830515  
H,0,-0.2904457298,5.33418514,-1.1755005062  
H,0,1.3543148736,5.1380641255,-1.8227400566  
H,0,0.1048118522,3.9507639702,-2.222495765  
C,0,1.6047269714,-3.5755587499,1.7184568729  
H,0,2.0333913469,-4.2186326786,0.9377972986  
H,0,1.5583191272,-4.1615010699,2.6430843599  
H,0,0.5708281241,-3.3485256831,1.421328644

-----

### **INT-CB**

E(RM06)= -2004.00132470 Hartree

Sum of electronic and thermal Free Energies = -2003.353905 Hartree

C,0,0.3033489966,-1.4464296966,-3.2673086278  
C,0,-0.8830183911,-0.6190833634,-2.7867072507  
C,0,-0.5507713661,-0.2870394747,-1.3299153807  
C,0,0.6986762405,-2.2231085437,-2.0198877663  
H,0,0.0492178937,-2.1004250981,-4.1089285863  
H,0,1.1265549311,-0.791612617,-3.5713405755  
H,0,-1.7986916619,-1.2196038658,-2.8464780629  
H,0,-1.0446110071,0.2869350494,-3.3808207457  
H,0,-0.0014763459,0.6674839305,-1.2935412449  
H,0,1.7585958487,-2.5034133163,-2.0194170146

H,0,0.1152730536,-3.1584094337,-1.9389548302  
N,0,0.3713796376,-1.3429440541,-0.8947306898  
C,0,-1.7859612216,-0.114101538,-0.388507145  
C,0,-2.5173997493,-1.4504481657,-0.279510424  
C,0,-3.4979798,-1.8529992647,-1.1932416794  
C,0,-2.1277390649,-2.3654271288,0.7032419585  
C,0,-4.0766029532,-3.1183409725,-1.1202833191  
H,0,-3.8290228189,-1.1700991672,-1.9733669225  
C,0,-2.7013646591,-3.6313056412,0.7798381837  
H,0,-1.3600415835,-2.0787012427,1.418712861  
C,0,-3.68041914,-4.0149871603,-0.1326520686  
H,0,-4.8418894873,-3.399988317,-1.8404339195  
H,0,-2.3751951369,-4.3216832068,1.5557910683  
H,0,-4.1317005746,-5.0029206778,-0.0735527302  
C,0,-2.6628090448,1.0649270353,-0.8315762275  
C,0,-4.0323210356,1.1081359776,-0.5516589914  
C,0,-2.0773153492,2.2154406534,-1.3768137557  
C,0,-4.7912942714,2.2457968332,-0.8185371404  
H,0,-4.5212312797,0.2453554589,-0.1050812026  
C,0,-2.8310893982,3.3521258901,-1.6505545156  
H,0,-1.0100519101,2.2434704024,-1.5856191054  
C,0,-4.1953369894,3.3738883693,-1.3728136271  
H,0,-5.8543599687,2.2463683524,-0.5867250891  
H,0,-2.3444267318,4.2268092003,-2.0779960531  
H,0,-4.7861813242,4.2624330026,-1.5834873238  
Si,0,-1.8097098269,0.8311617161,2.320036432  
O,0,-1.2246991869,0.2295866512,0.8694562149  
C,0,-3.5554912561,0.2873789827,2.7460260879  
H,0,-3.7388817444,-0.7760464339,2.5469900144  
H,0,-3.7033409775,0.4512148587,3.8233719381  
H,0,-4.3196452508,0.8748273836,2.2229217269  
C,0,-1.7326633104,2.700492727,2.3326625205  
H,0,-2.2712829727,3.1427496788,1.4835596797  
H,0,-2.1860521396,3.090292106,3.2545938319  
H,0,-0.6879425515,3.0372086748,2.3046287672  
C,0,-0.6202431646,0.1355796287,3.5854688125  
H,0,0.4132890827,0.3919619193,3.3170925203  
H,0,-0.8232532151,0.5572440334,4.5793160307  
H,0,-0.704372718,-0.9565537499,3.6670167254  
C,0,1.3286122354,-0.9709360354,0.0851393465  
H,0,0.7997363655,-0.6539024101,0.9943305526  
C,0,2.4891576383,-1.8735427864,0.5219120299  
H,0,2.9200995304,-2.4039996882,-0.3412527448  
C,0,2.2410838772,-2.8521609739,1.6504552753

H,0,3.20800059,-3.2261419816,2.0224010277  
H,0,1.7772659214,-2.3101464779,2.490855565  
C,0,4.6939709754,-0.4601692393,0.1788280056  
O,0,4.389762655,-0.2562001536,-1.2388265834  
C,0,2.3924137584,0.2288067065,-0.1046152183  
C,0,3.3137935801,-0.5991126303,0.806658147  
H,0,3.2879751177,-0.3007166677,1.8623417058  
C,0,3.1383449494,0.2227602112,-1.4214960773  
O,0,2.7401327468,0.5425305106,-2.5136228629  
C,0,5.4042680521,0.7850133533,0.6763474902  
H,0,5.6883740763,0.6666016933,1.7288809127  
H,0,6.3112213001,0.9689387963,0.0891392905  
H,0,4.7643576583,1.6744014968,0.596319422  
C,0,5.5759289459,-1.6813306095,0.2877523726  
H,0,6.5216094109,-1.5208055272,-0.242737882  
H,0,5.8062417005,-1.8794446677,1.3419004641  
H,0,5.0970398915,-2.5706348396,-0.1356301294  
C,0,1.9056906146,1.5574011762,0.3921121981  
O,0,1.6617331159,1.7643465383,1.5642464308  
O,0,1.7517670695,2.4649158768,-0.5761494363  
C,0,1.2625190019,3.7656840479,-0.1916012187  
H,0,0.8578728962,4.1839972148,-1.1189817523  
H,0,0.4411232552,3.6397850706,0.5237653377  
C,0,2.3707164884,4.6264096447,0.359446488  
H,0,1.9920222257,5.634551631,0.562053173  
H,0,2.7642920871,4.2180143202,1.2960281593  
H,0,3.1911105871,4.7105785116,-0.3624279063  
C,0,1.3607693784,-4.0164902854,1.2250996862  
H,0,1.8367399,-4.6004949158,0.4257506848  
H,0,1.1583264616,-4.6993436573,2.0584262069  
H,0,0.3962718363,-3.661378639,0.8376104808

-----

#### 4aa-INT2

E(RM06)= -883.108145700 Hartree

Sum of electronic and thermal Free Energies= -882.837808 Hartree

C,0,-1.3735771462,-1.5487696909,0.2477157749  
O,0,-0.2677256453,-2.4803525914,0.0156644684  
C,0,0.3557183442,-0.4802758373,-1.027030015  
C,0,-0.7186893282,-0.1672152122,0.0091255602  
H,0,-0.1974137165,0.1137569361,0.940343759  
C,0,0.6926006269,-1.9396673693,-0.739157941  
O,0,1.6665272061,-2.5425115936,-1.1093020552  
C,0,-1.8206768355,-1.7714658707,1.6746731772  
H,0,-2.6709754974,-1.1260306421,1.9245893538

H,0,-2.1456861061,-2.8089809019,1.8121783197  
H,0,-1.0053546376,-1.5673705287,2.3779111928  
C,0,-2.4644349513,-1.9078172245,-0.7432780326  
H,0,-2.7334723255,-2.9624193035,-0.6176369359  
H,0,-3.3660786669,-1.3073244891,-0.5777238888  
H,0,-2.1392287585,-1.7661223674,-1.7813229961  
C,0,1.6228136334,0.3362632231,-0.9186752177  
O,0,2.1150711704,0.6780536543,0.133435997  
O,0,2.1346229169,0.5988061464,-2.1175923981  
C,0,3.3952063661,1.3066655196,-2.1388627072  
H,0,3.2600097887,2.268008422,-1.6284228987  
H,0,4.1274715118,0.7225134993,-1.5696565  
C,0,3.791745692,1.4746675743,-3.5784567116  
H,0,4.7469826808,2.0067434805,-3.6388386351  
H,0,3.9108536286,0.5031214263,-4.0695673701  
H,0,3.0438034945,2.053721552,-4.1311526477  
H,0,-0.0293059315,-0.4254576646,-2.0563483468  
C,0,-1.6696533723,0.9689726244,-0.3791475674  
C,0,-0.9106054515,2.279629558,-0.6458869093  
H,0,-0.2098271492,2.1106933549,-1.4754557317  
H,0,-0.2966409663,2.5287696089,0.2331568838  
C,0,-1.8283575319,3.4397073415,-0.9967330208  
H,0,-1.2492706286,4.3217936326,-1.2897548576  
H,0,-2.4924229149,3.1825166197,-1.8319029769  
H,0,-2.4649385908,3.7343208297,-0.1530294505  
C,0,-2.645323345,1.2323178695,0.7359766325  
O,0,-3.8507671049,1.2004023338,0.6313893427  
H,0,-2.166332465,1.5025301159,1.7109909346  
H,0,-2.2489947734,0.7004198543,-1.2760302548

-----

#### 4aa-INT3

E(RM06)= -883.102327049 Hartree

Sum of electronic and thermal Free Energies= -882.831985 Hartree

C,0,-1.7449306686,1.3044643688,0.2465678543  
O,0,-0.7731385141,2.3935389826,0.1237770566  
C,0,0.4487888686,0.4500906753,-0.3067484148  
C,0,-1.0509129982,0.1289921696,-0.4857463231  
H,0,-1.25413978,0.2560542046,-1.5597096311  
C,0,0.455908471,1.960570383,-0.1932905855  
O,0,1.3843378136,2.7050760763,-0.3744075196  
C,0,-2.9932827586,1.8124541357,-0.4451939644  
H,0,-3.8116548656,1.088858696,-0.376214171  
H,0,-3.3263221647,2.7442131351,0.0262550315  
H,0,-2.7974712249,2.0147803133,-1.5043947315



C,0,-1.982981716,1.0820646787,1.7290972333  
H,0,-2.3068518375,2.0224479814,2.1891497436  
H,0,-2.7707032755,0.3381200565,1.8950294771  
H,0,-1.077045248,0.752188804,2.2516543179  
C,0,1.1025800325,-0.2400277773,0.8730757395  
O,0,1.2879857116,-1.4382931985,0.9098618423  
O,0,1.4237716341,0.5963323092,1.854138313  
C,0,2.0039653264,0.0174942592,3.0455902103  
H,0,1.3107818101,-0.7402046233,3.4324611524  
H,0,2.9342002663,-0.4896234838,2.7652899016  
C,0,2.2297748559,1.1383489684,4.020147641  
H,0,2.6710849711,0.743903886,4.9414837067  
H,0,2.911356632,1.8887748306,3.6065741902  
H,0,1.2865519999,1.6337142172,4.2766597938  
C,0,-1.4779924942,-1.2906741325,-0.1120979483  
H,0,-1.3304315431,-1.4773028675,0.962825847  
C,0,-2.9517321332,-1.5854784858,-0.4499871465  
H,0,-3.1277971744,-1.3220522712,-1.5040847348  
H,0,-3.5899325047,-0.9249267637,0.1502976578  
C,0,-3.3623922117,-3.0290582123,-0.1963870241  
H,0,-4.4431554195,-3.1521845564,-0.3233630074  
H,0,-2.8771473318,-3.727838631,-0.8887483808  
H,0,-3.1121841983,-3.344400795,0.8251951454  
C,0,-0.639133939,-2.3034955153,-0.865795273  
H,0,-0.4220130581,-3.251563985,-0.3292579032  
O,0,-0.2770811744,-2.1443177333,-2.011360073  
H,0,1.0247724009,0.1457298403,-1.1876919034

-----

#### 4aa-INT4

E(RM06)= -883.102877663 Hartree

Sum of electronic and thermal Free Energies= -882.830575 Hartree

C,0,2.0237048284,-0.6347337994,0.1234602511  
O,0,1.8868881155,-2.0782791354,-0.0719182634  
C,0,-0.1571318177,-1.1861966527,-0.8031496103  
C,0,0.8920427725,-0.0544474178,-0.7644516555  
H,0,1.3026618993,0.0054253269,-1.7865538248  
C,0,0.6776629424,-2.4259325028,-0.5236105314  
O,0,0.3395683618,-3.5680602989,-0.6970148239  
C,0,3.4090940328,-0.2778820567,-0.3722666019  
H,0,3.6186365311,0.7879748839,-0.2218925597  
H,0,4.1623157383,-0.8406155731,0.1903234514  
H,0,3.5253682104,-0.5132633506,-1.4365444504  
C,0,1.8894838474,-0.3651497779,1.6099130625  
H,0,2.6614032947,-0.9299408928,2.1447594126

H,0,2.0355514912,0.6978166181,1.8329009246  
 H,0,0.9140323265,-0.6779021647,1.9941995511  
 C,0,-1.2735535697,-1.0819251069,0.2187515452  
 O,0,-1.1891582765,-1.4305484009,1.3749475993  
 O,0,-2.3634144533,-0.5346243708,-0.3188717498  
 C,0,-3.4705422089,-0.2779732527,0.5746374567  
 H,0,-3.8156558446,-1.2338571713,0.9849499506  
 H,0,-3.1040108706,0.3334729868,1.4088238825  
 C,0,-4.5311747503,0.4233475525,-0.2262389303  
 H,0,-5.3848914481,0.6622322881,0.4163864688  
 H,0,-4.1490236955,1.3606565338,-0.6483388043  
 H,0,-4.8880902957,-0.205771973,-1.0486525683  
 C,0,0.3677670066,1.3379141933,-0.4013177248  
 C,0,-0.614995207,1.8643821951,-1.4662243331  
 H,0,-1.3393863013,1.0779592491,-1.707506856  
 H,0,-0.0556212623,2.0639139659,-2.3944645483  
 C,0,-1.3524342041,3.1133226378,-1.0142322425  
 H,0,-2.0740016665,3.440392238,-1.770897706  
 H,0,-1.9046232095,2.9279331369,-0.0827258946  
 H,0,-0.6725612994,3.9533121747,-0.8234963409  
 H,0,-0.6113239059,-1.2855553201,-1.7941597724  
 C,0,1.4934717506,2.3376902902,-0.3500860068  
 O,0,1.7546372273,3.0551031921,0.5880242449  
 H,0,2.0755325273,2.4157867737,-1.3032216778  
 H,0,-0.1192241169,1.3308093517,0.5876662061

-----

### 4.3. References.

- [1] (a) P. Hohenberg and W. Kohn, *Phys. Rev. B*, 1964, **136**, 864; (b) W. Kohn and L. J. Sham, *Phys. Rev. A*, 1965, **140**, 1133.
- [2] M. J. Frisch, G. W. Trucks, H. B. Schlegel, G. E. Scuseria, M. A. Robb, J. R. Cheeseman, G. Scalmani, V. Barone, B. Mennucci, G. A. Petersson, H. Nakatsuji, M. Caricato, X. Li, H. P. Hratchian, A. F. Izmaylov, J. Bloino, G. Zheng, J. L. Sonnenberg, M. Hada, M. Ehara, K. Toyota, R. Fukuda, J. Hasegawa, M. Ishida, T. Nakajima, Y. Honda, O. Kitao, H. Nakai, T. Vreven, J. A., Jr. Montgomery, J. E. Peralta, F. Ogliaro, M. Bearpark, J. J. Heyd, E. Brothers, K. N. Kudin, V. N. Staroverov, R. Kobayashi, J. Normand, K. Raghavachari, A. Rendell, J. C. Burant, S. S. Iyengar, J. Tomasi, M. Cossi, N. Rega, N. J. Millam, M. Klene, J. E. Knox, J. B. Cross, V. Bakken, C. Adamo, J. Jaramillo, R. Gomperts, R. E. Stratmann, O. Yazyev, A. J. Austin, R. Cammi, C. Pomelli, J. W. Ochterski, R. L. Martin, K. Morokuma, V. G. Zakrzewski, G. A. Voth, P. Salvador, J. J. Dannenberg, S. Dapprich, A. D. Daniels,

Ö. Farkas, J. B. Foresman, J. V. Ortiz, J. Cioslowski, D. J. Fox, Gaussian 09, revision A. 02; Gaussian, Inc.: Wallingford, CT. 2009.

[3] a) Y. Zhao and D. G. Truhlar, *J. Chem. Phys.* 2006, **125**, 194101; b) Y. Zhao and D. G. Truhlar *Acc. Chem. Res.* 2008, **41**, 157; c) Y. Zhao and D. G. Truhlar, *Theor. Chem. Account*, 2008, **120**, 215.

[4] A. Marenich, C. Cramer and D. Truhlar, *J. Phys. Chem. B*, 2009, **113**, 6378.

[5] C. Legault, CYLview, 1.0b; Université de Sherbrooke: Quebec, Canada, 2009.

[6] a) S. W. Benson, *The Foundations of Chemical Kinetics*, New York, McGraw-Hill Book Co. Inc., 1960; b) Q. Liu, Y. Lan, J. Liu, et al. *J. Am. Chem. Soc.* 2009, **131**, 10201; c) F. Schoenebeck, K. N. Houk, *J. Am. Chem. Soc.* 2010, **132**, 2496; d) B. Liu, M. Gao, L. Dang, H. Zhao, T. B. Marder and Z. Lin, *Organometallics*, 2012, **31**, 3410; e) Q. Zhou and Y. Li, *J. Am. Chem. Soc.* 2015, **137**, 10182.

## 5. NMR Spectra for Michael Product 3-11

$^1\text{H}$  NMR of product **3aa** (400 MHz,  $\text{CDCl}_3$ )

Mixture of two diastereoisomers

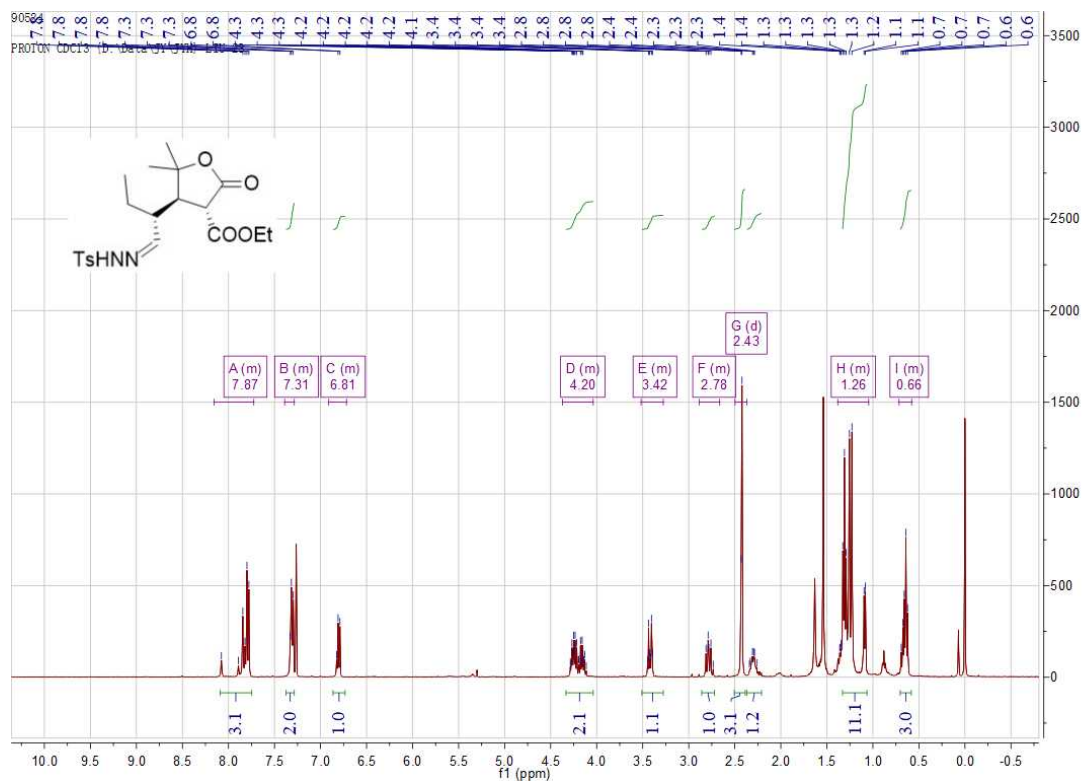

$^{13}\text{C}$  NMR of product **3aa** (100 MHz,  $\text{CDCl}_3$ )

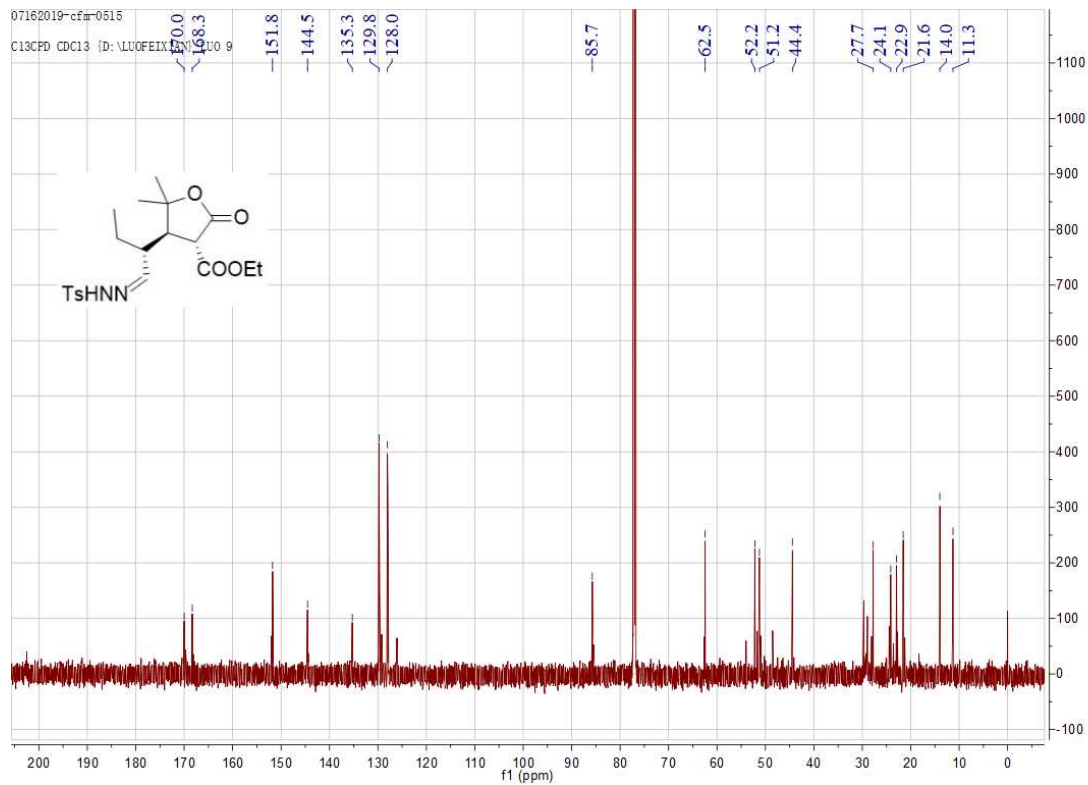

$^1\text{H}$  NMR of product **3ab** (400 MHz,  $\text{CDCl}_3$ )

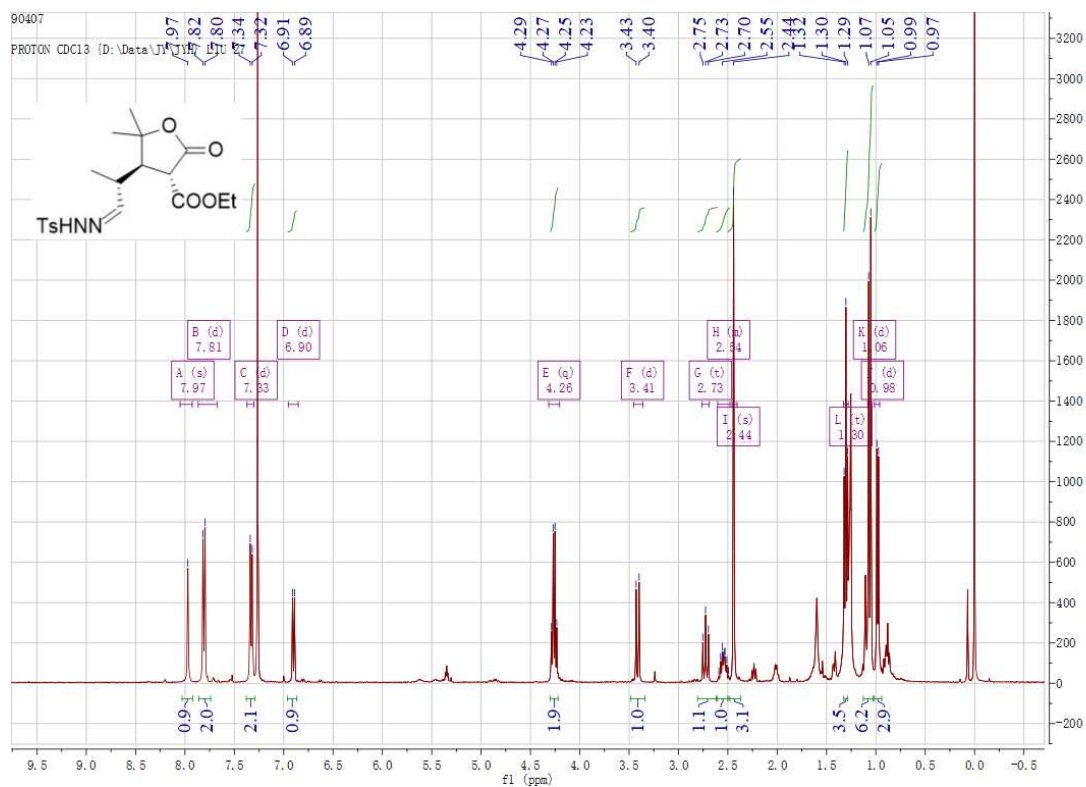

<sup>13</sup>C NMR of product **3ab** (100 MHz, CDCl<sub>3</sub>)

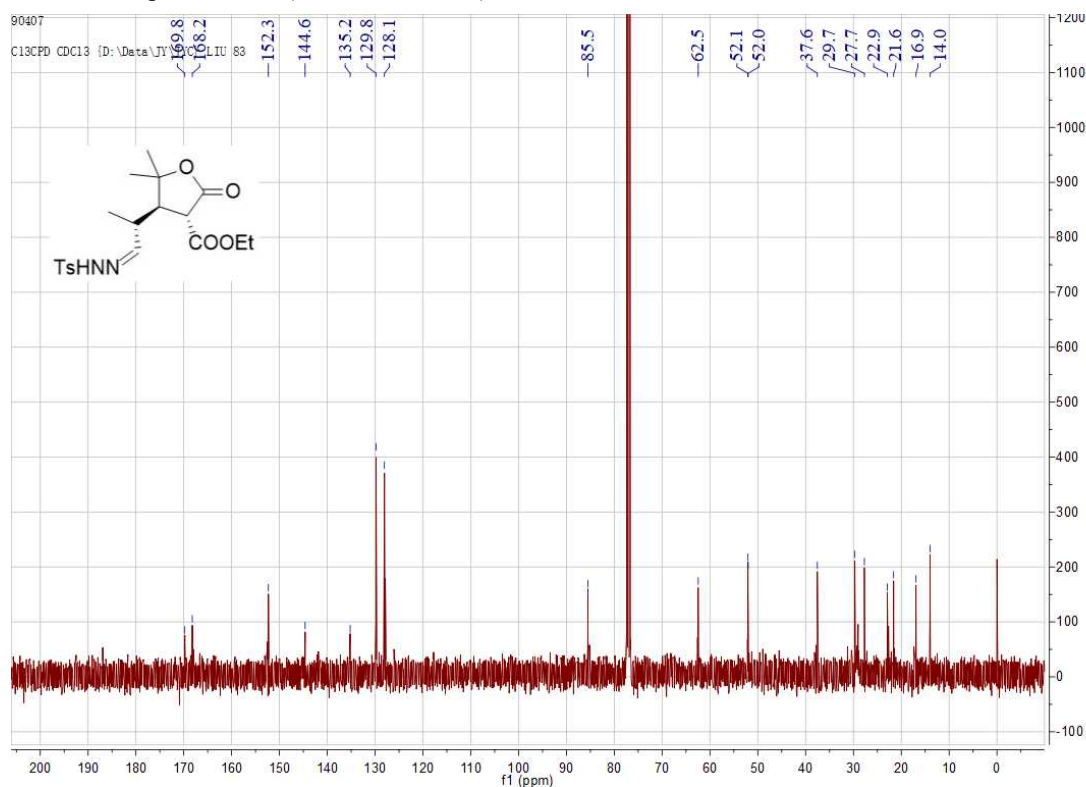

<sup>1</sup>H NMR of product **3ac** (400 MHz, CDCl<sub>3</sub>)

Mixture of two diastereoisomers

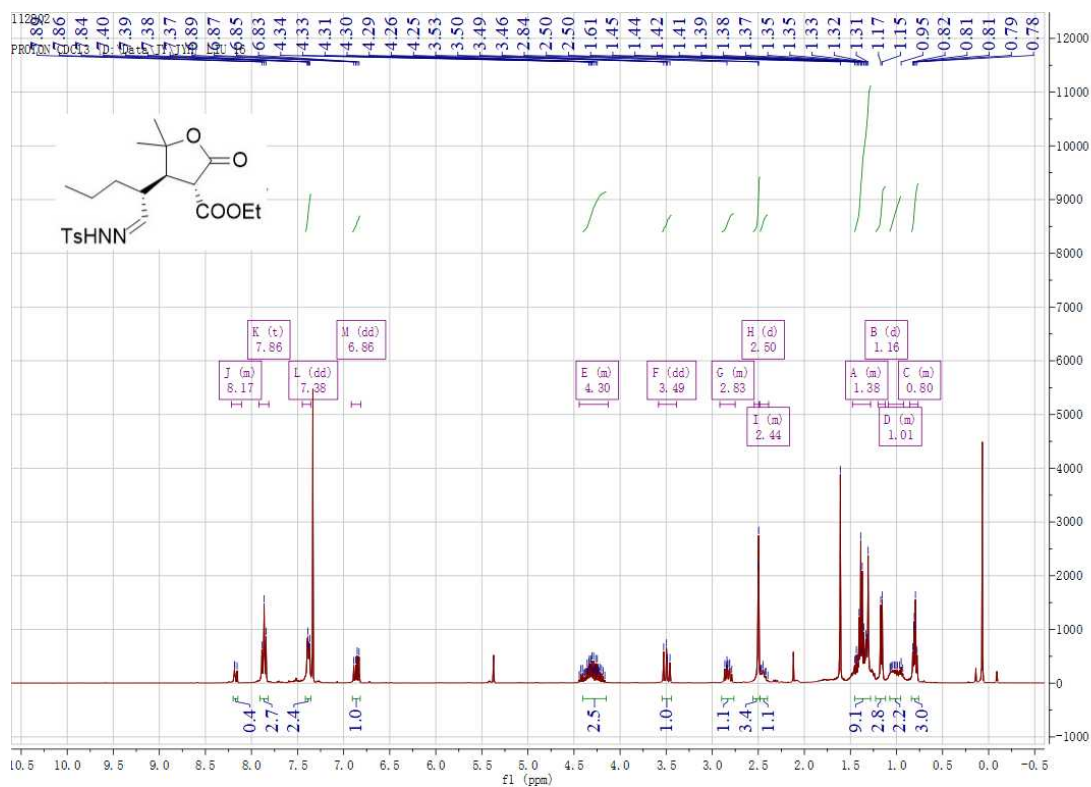

<sup>13</sup>C NMR of product 3ac (100 MHz, CDCl<sub>3</sub>)

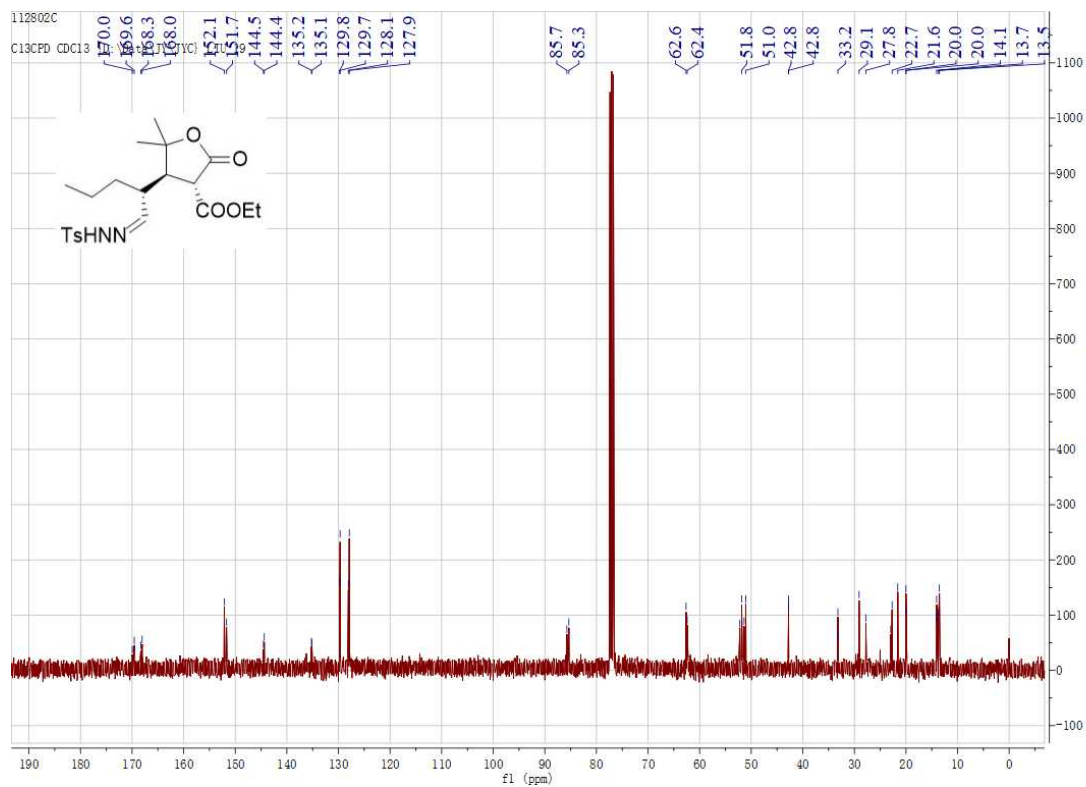

<sup>1</sup>H NMR of product 3ad (400 MHz, CDCl<sub>3</sub>)

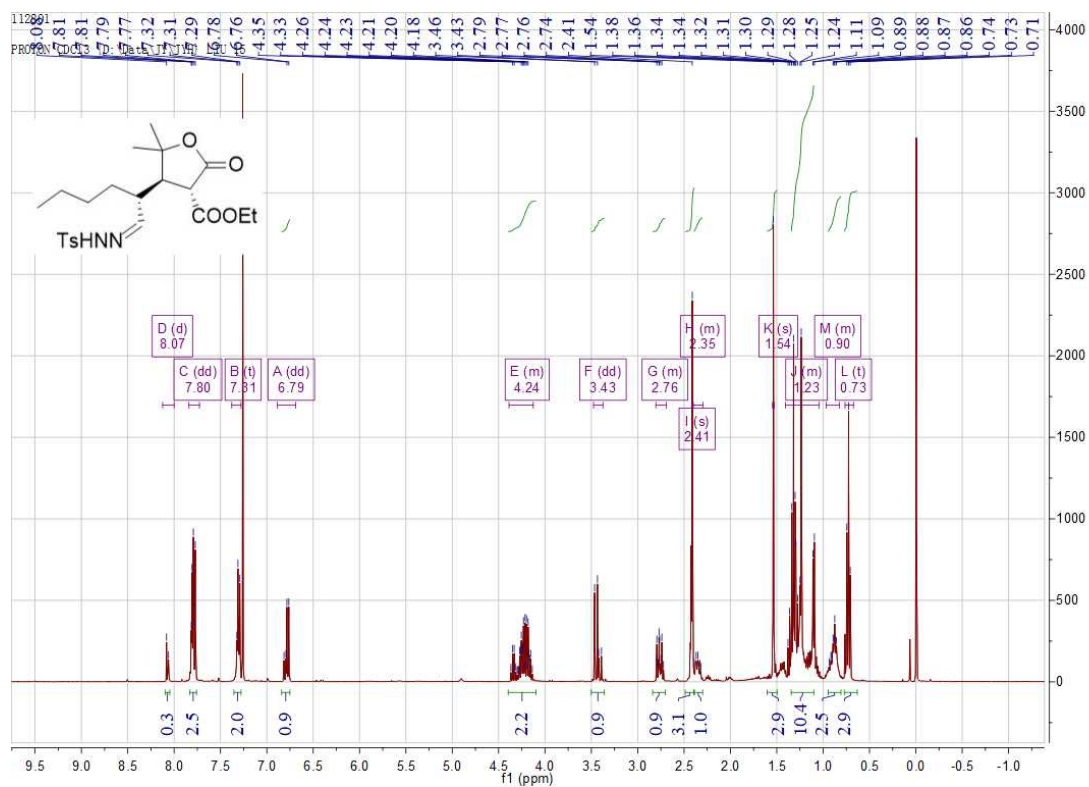

<sup>13</sup>C NMR of product **3ad** (100 MHz, CDCl<sub>3</sub>)

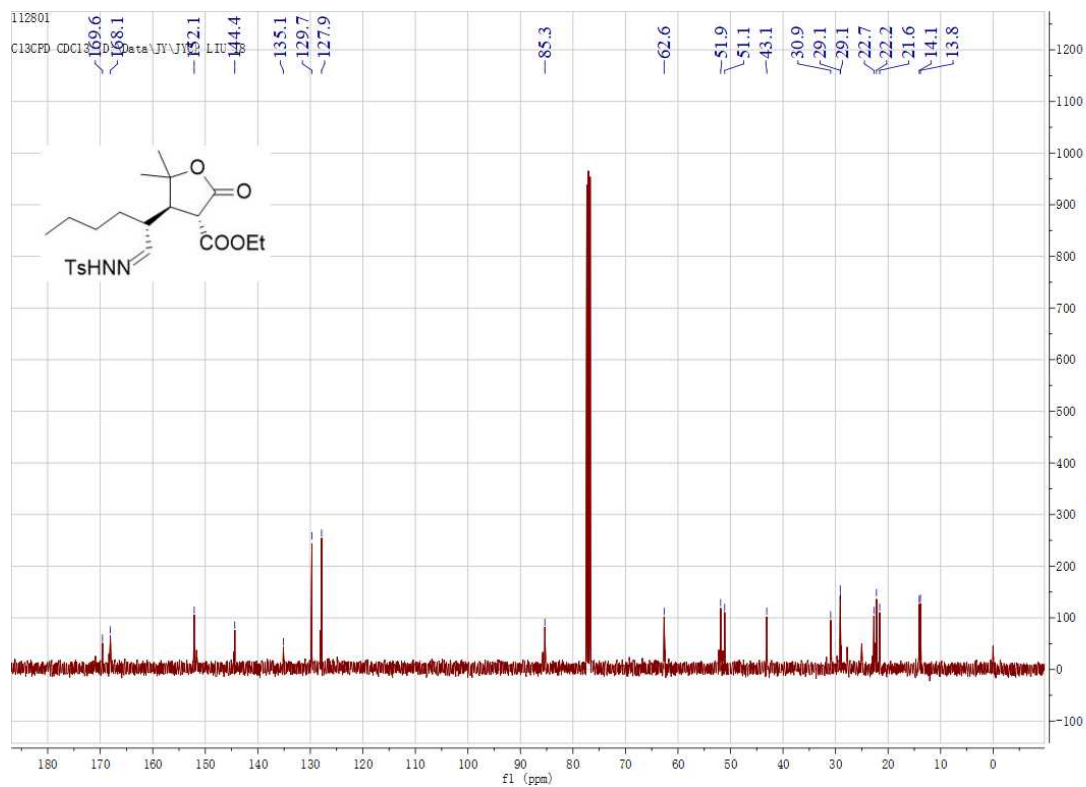

<sup>1</sup>H NMR of product **3ae** (400 MHz, CDCl<sub>3</sub>)

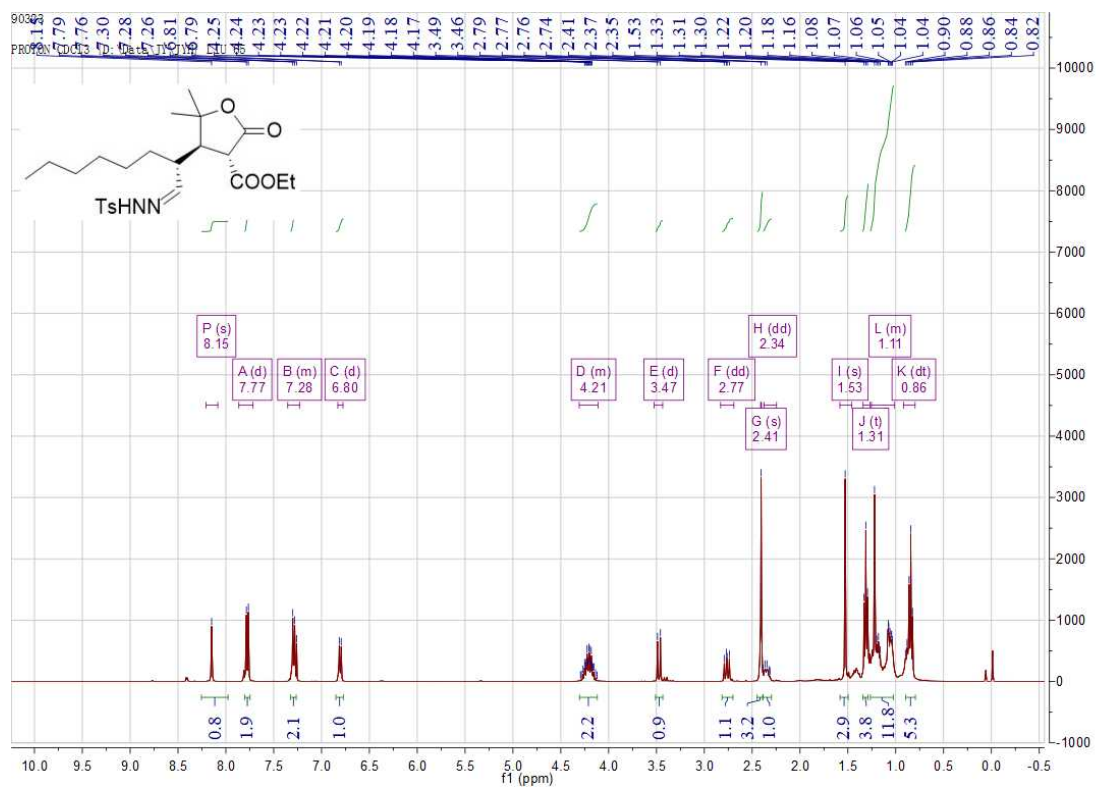

<sup>13</sup>C NMR of product **3ae** (100 MHz, CDCl<sub>3</sub>)

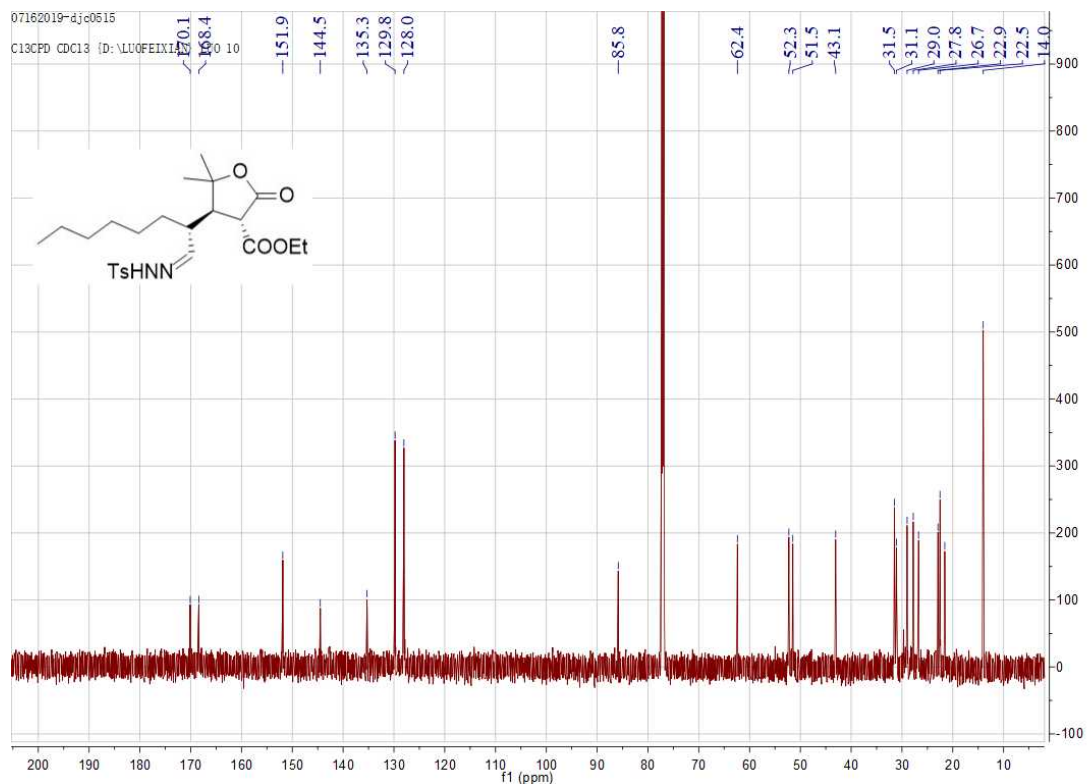

<sup>1</sup>H NMR of product **3af** (400 MHz, CDCl<sub>3</sub>)





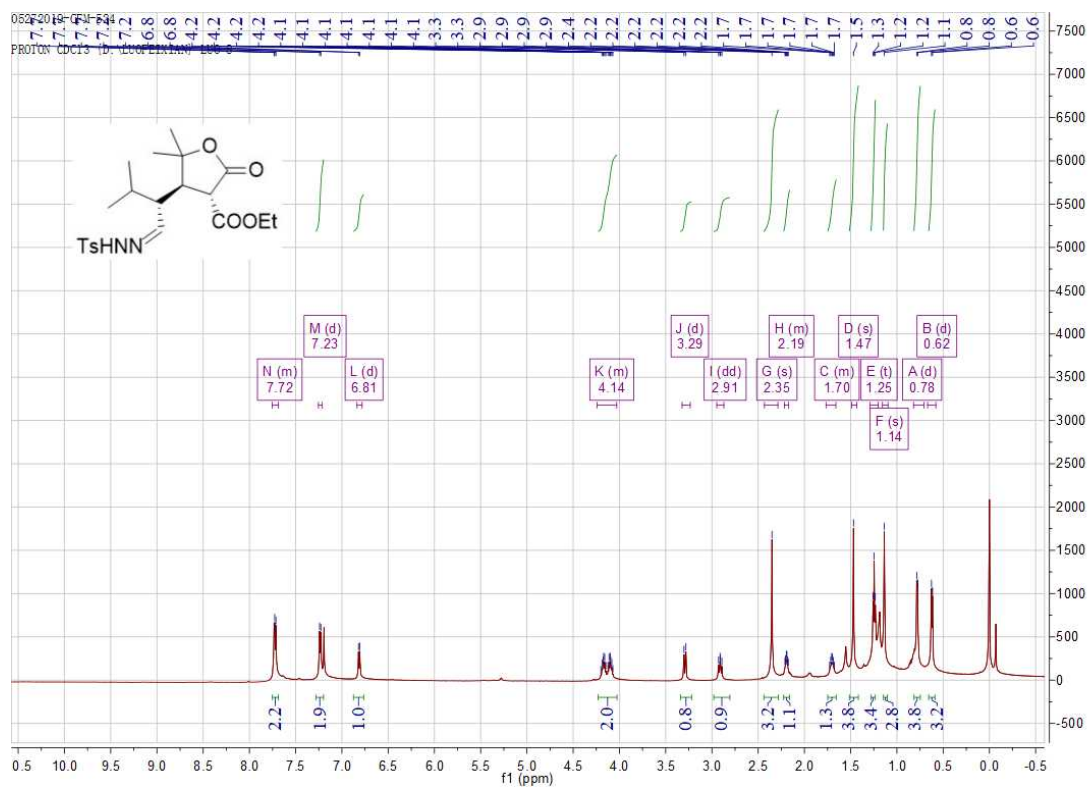

<sup>13</sup>C NMR of product **3a** (100 MHz, CDCl<sub>3</sub>)

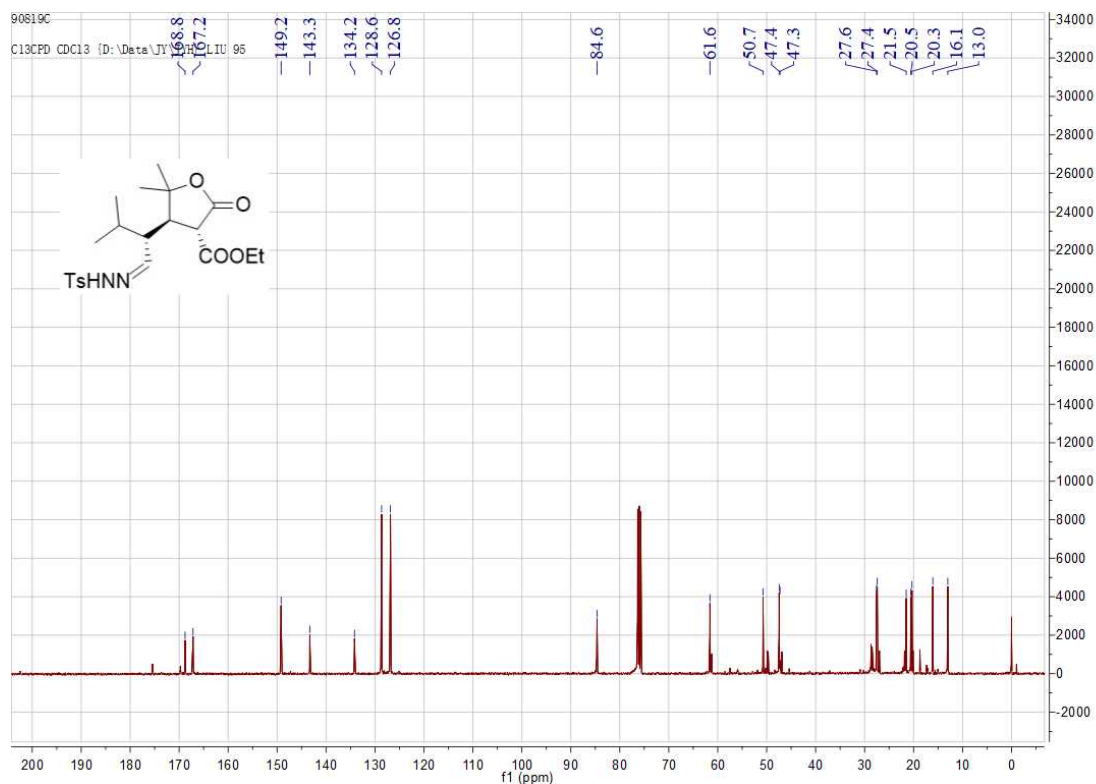

<sup>1</sup>H NMR of product **3ah** (400 MHz, CDCl<sub>3</sub>)

Mixture of two diastereoisomers

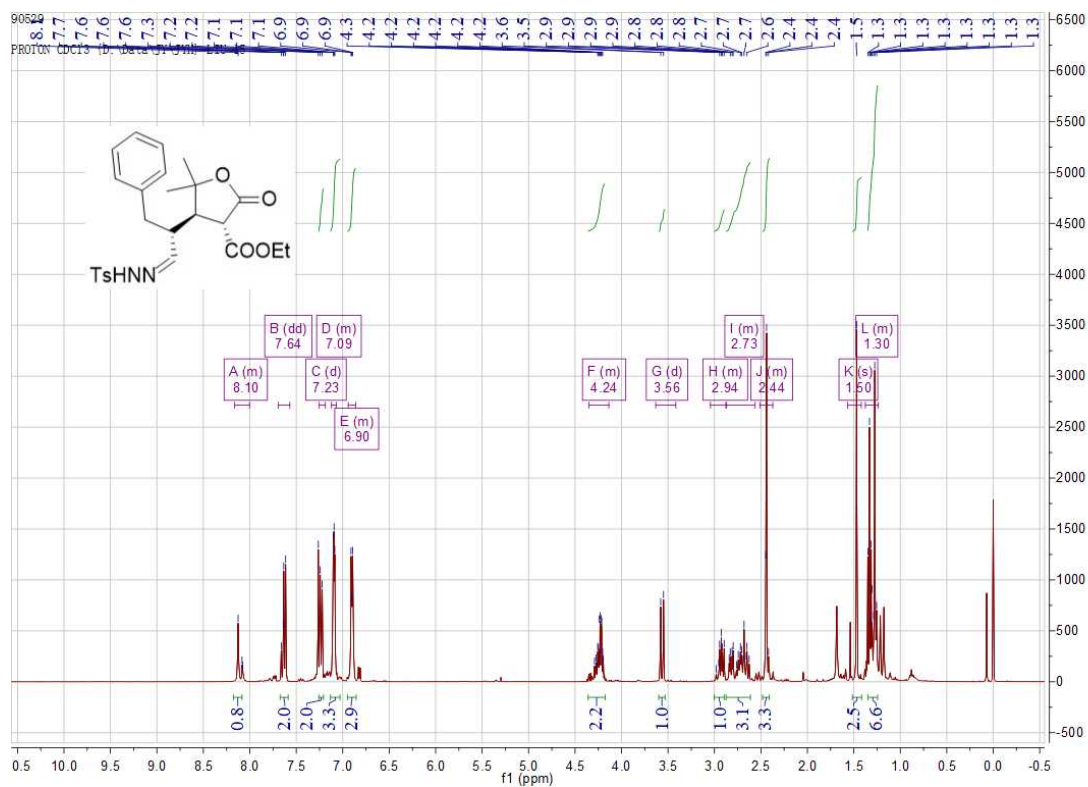

<sup>13</sup>C NMR of product **3ah** (100 MHz, CDCl<sub>3</sub>)

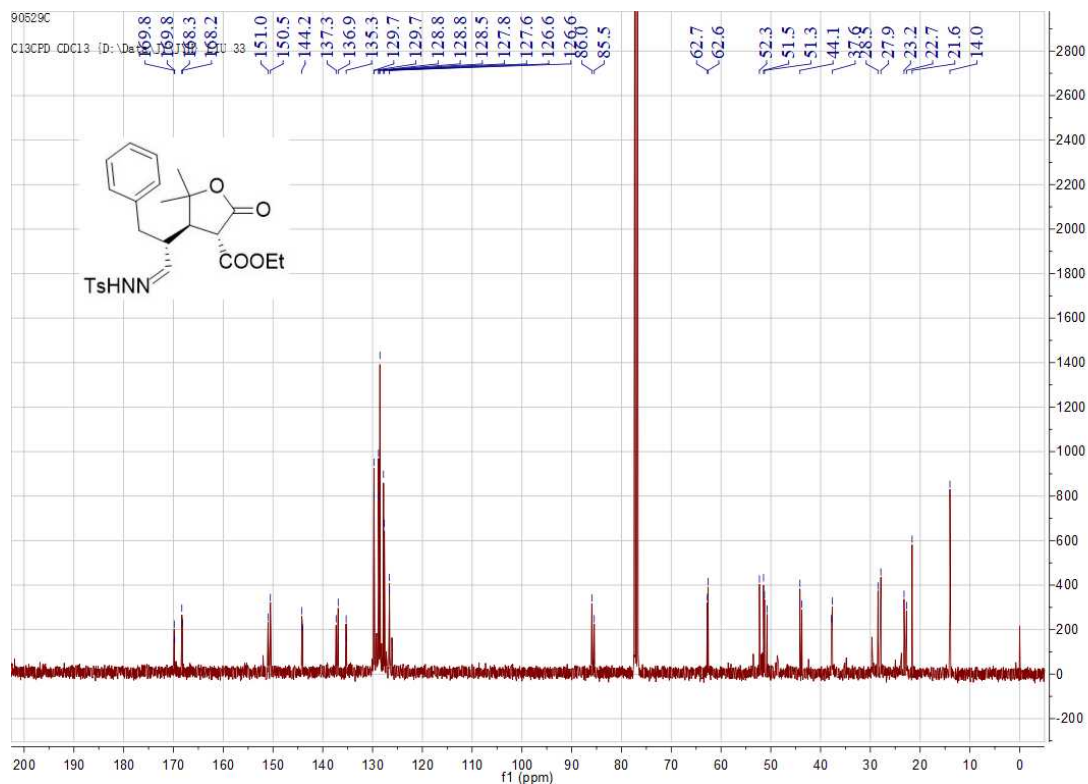

<sup>1</sup>H NMR of product **3ai** (400 MHz, CDCl<sub>3</sub>)

Mixture of two diastereoisomers

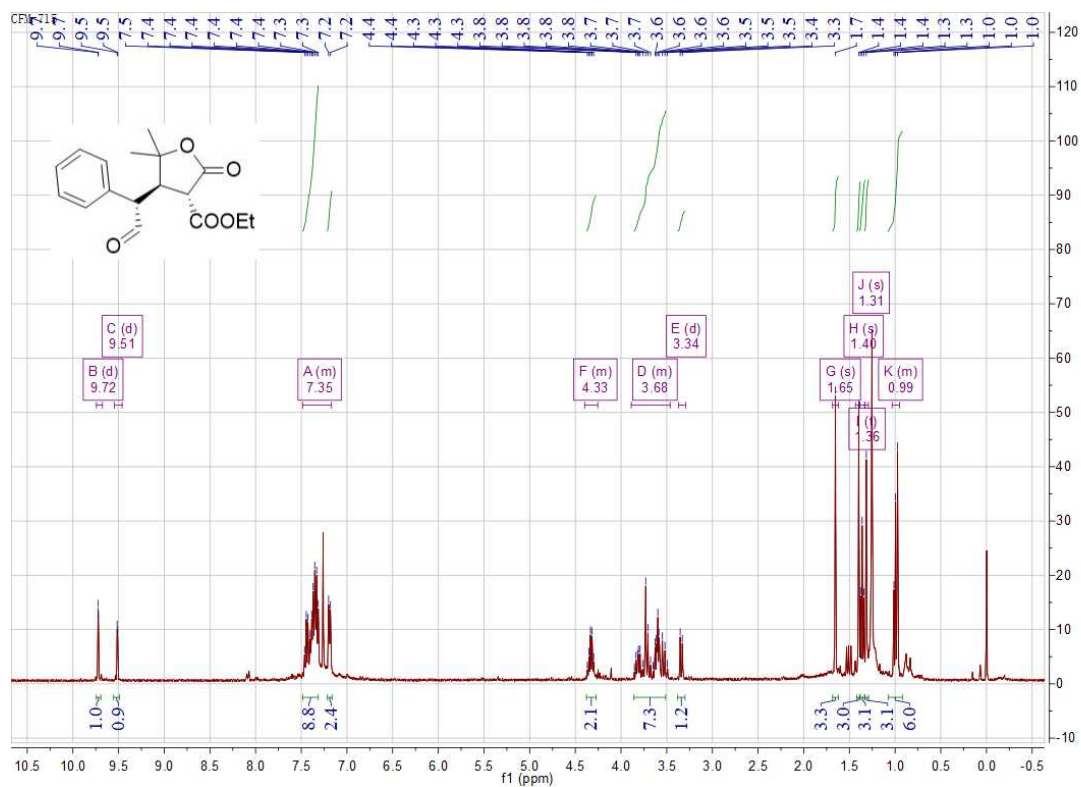

**<sup>13</sup>C NMR of product 3ai (100 MHz, CDCl<sub>3</sub>)**

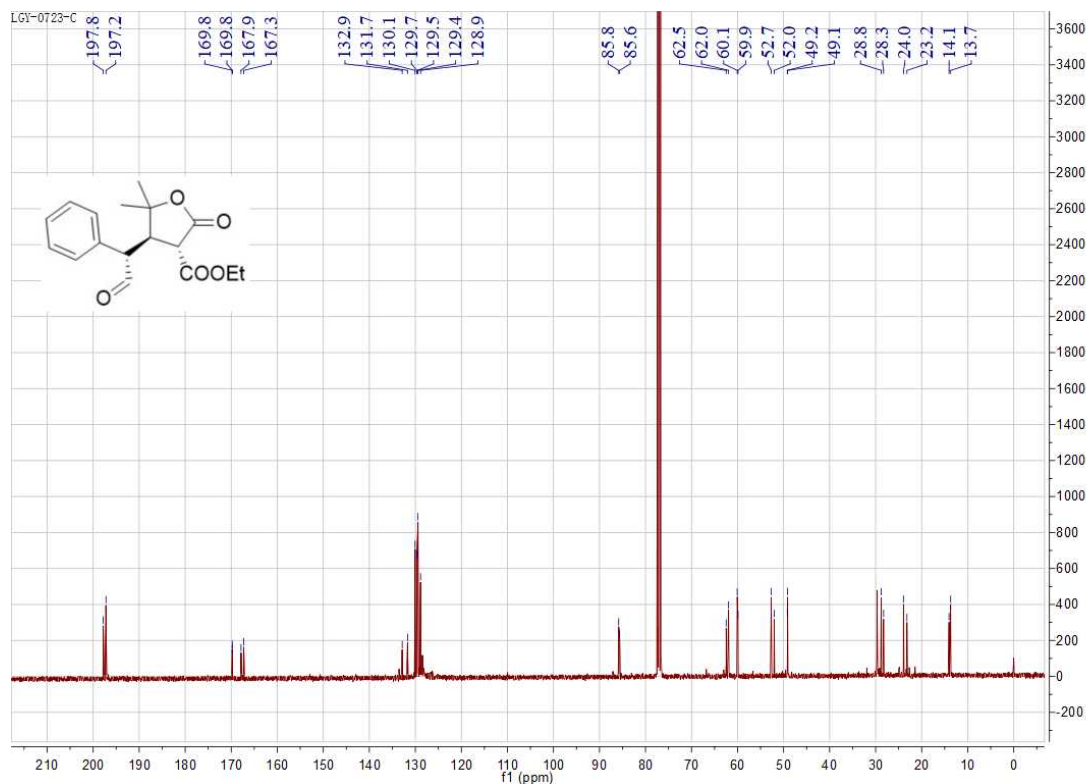

**<sup>1</sup>H NMR of product 3aj (400 MHz, CDCl<sub>3</sub>)**

Mixture of two diastereoisomers

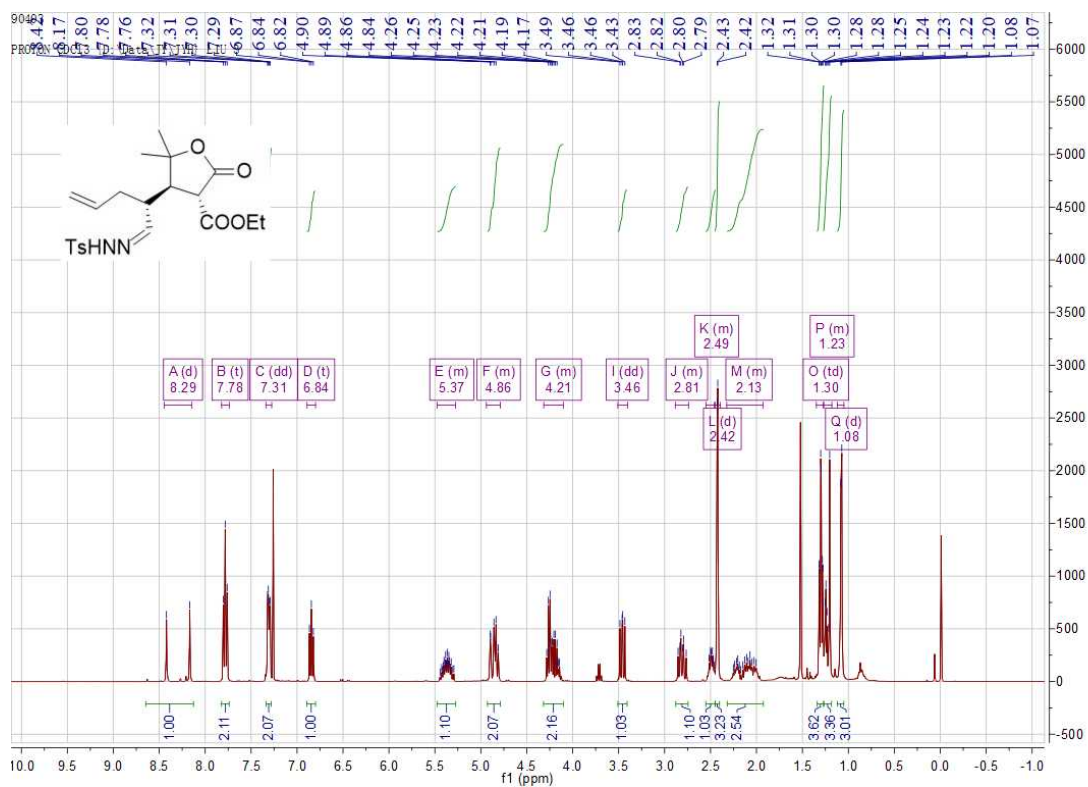

<sup>13</sup>C NMR of product **3aj** (100 MHz, CDCl<sub>3</sub>)

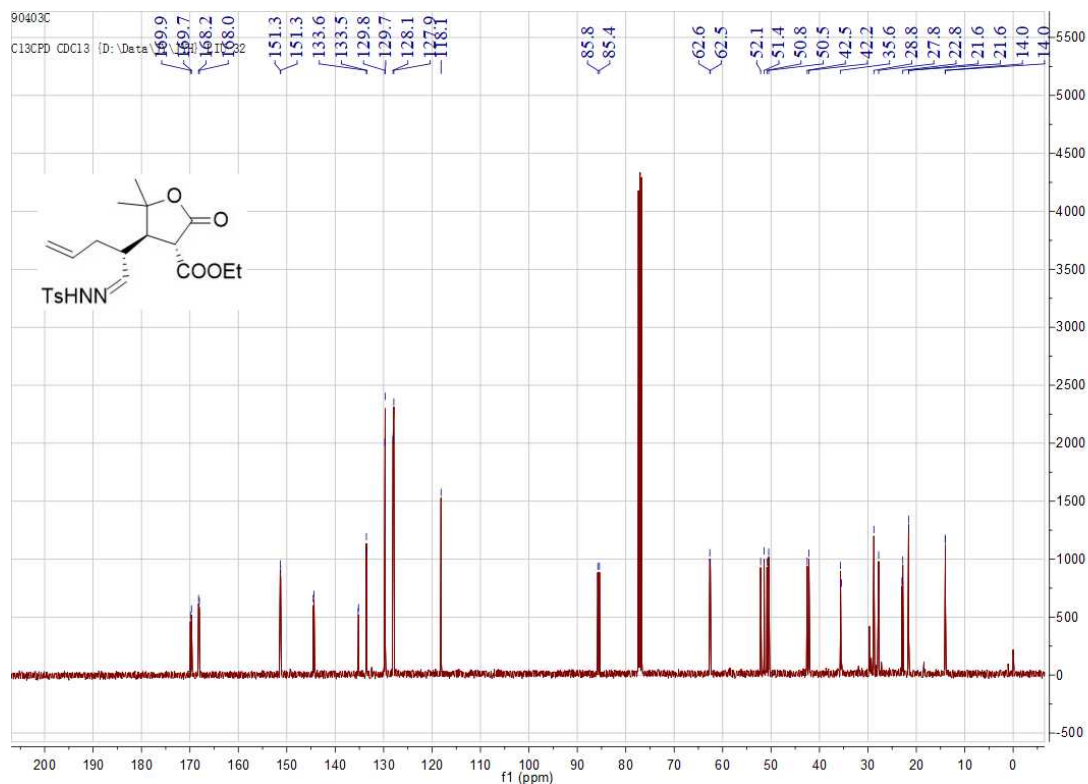

<sup>1</sup>H NMR of product **3ak** (400 MHz, CDCl<sub>3</sub>)





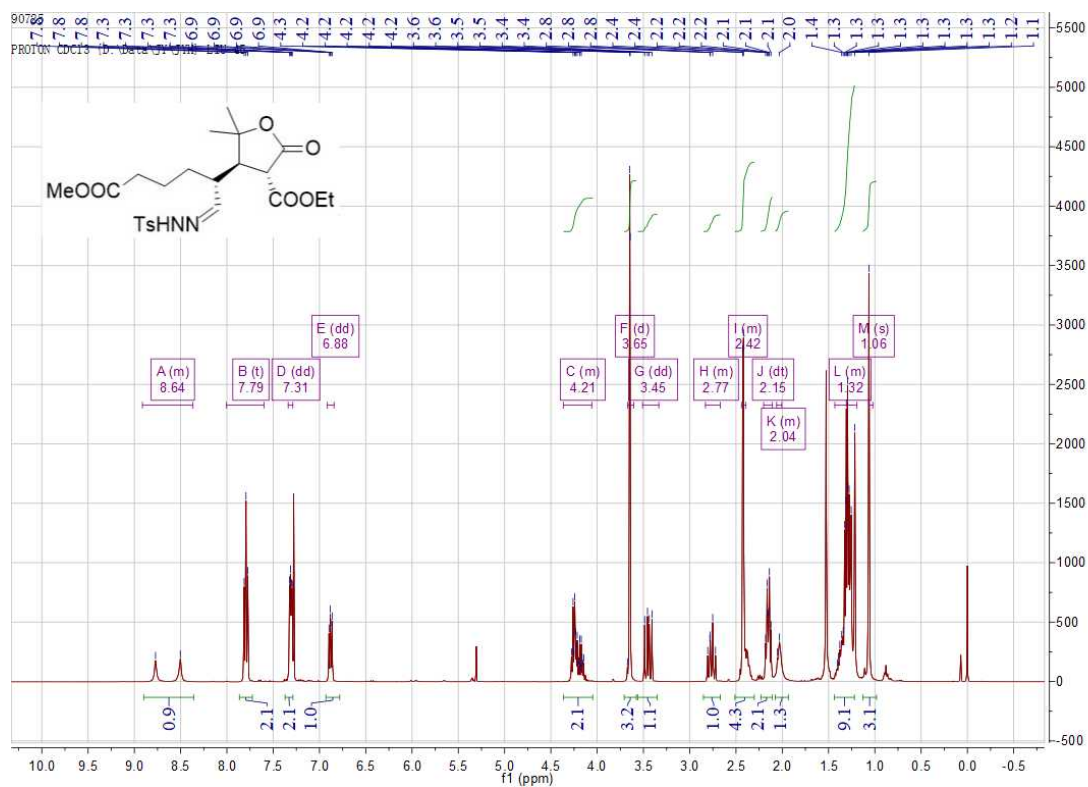

<sup>13</sup>C NMR of product **3al** (100 MHz, CDCl<sub>3</sub>)

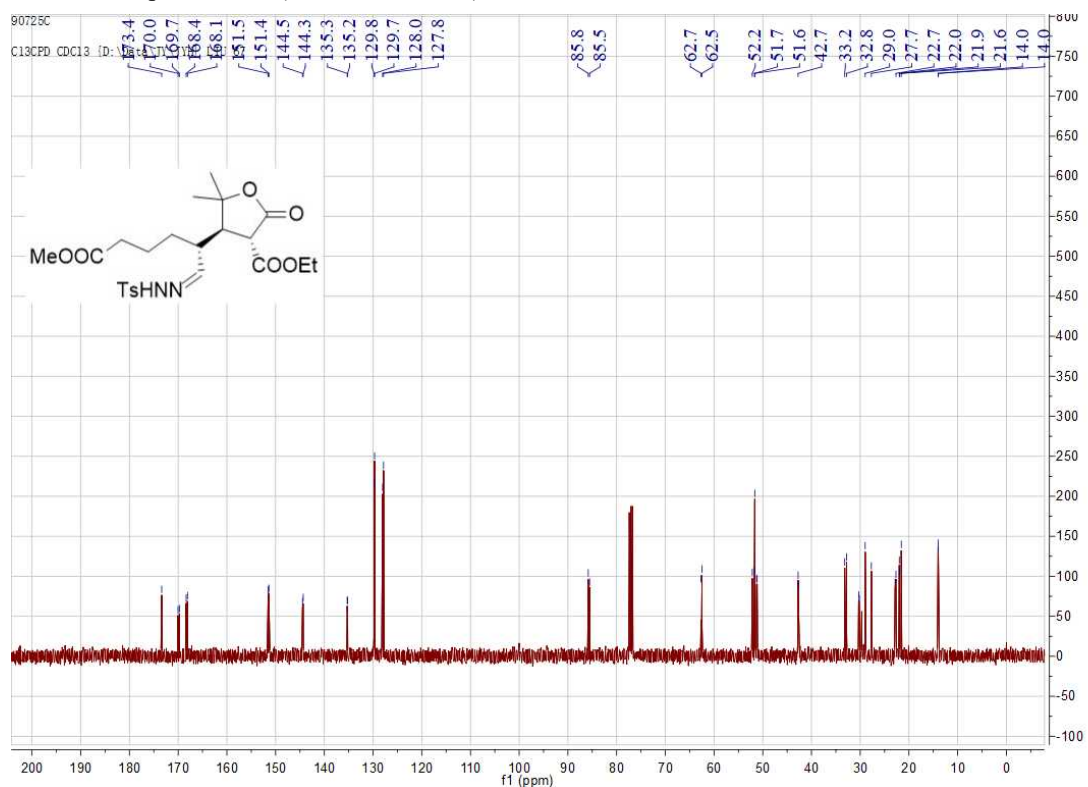

<sup>1</sup>H NMR of product **3am** (400 MHz, CDCl<sub>3</sub>)

Mixture of two diastereoisomers

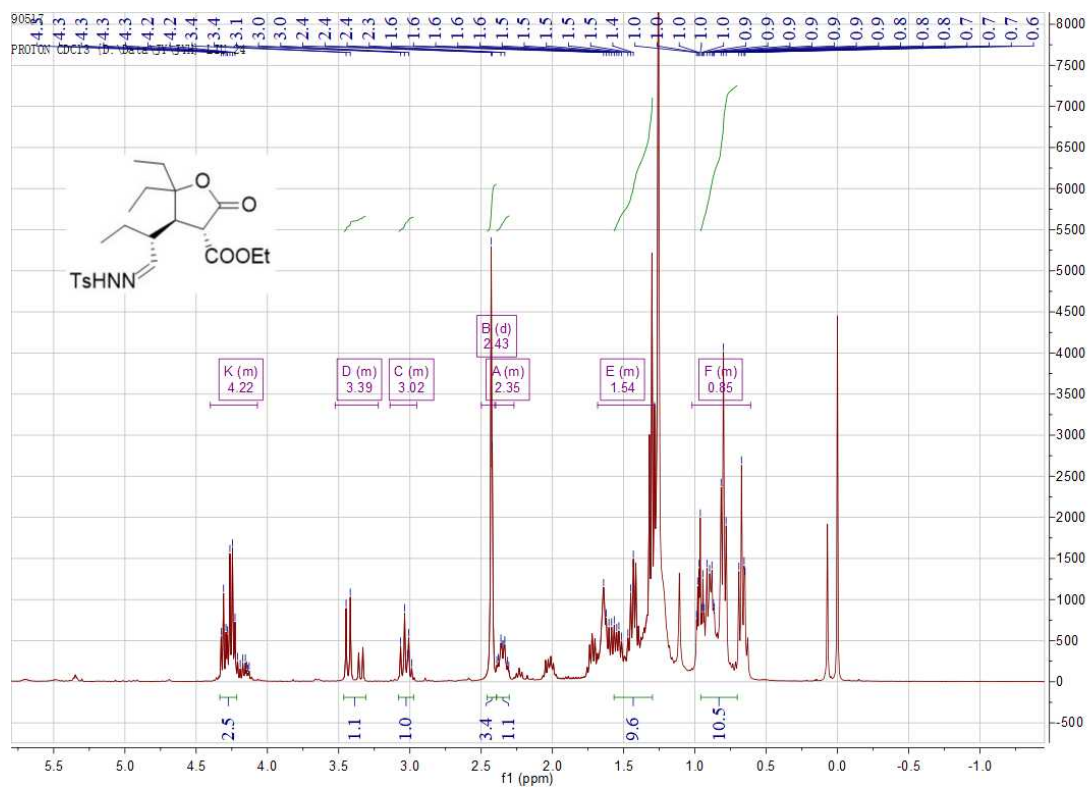

<sup>13</sup>C NMR of product **3am** (100 MHz, CDCl<sub>3</sub>)

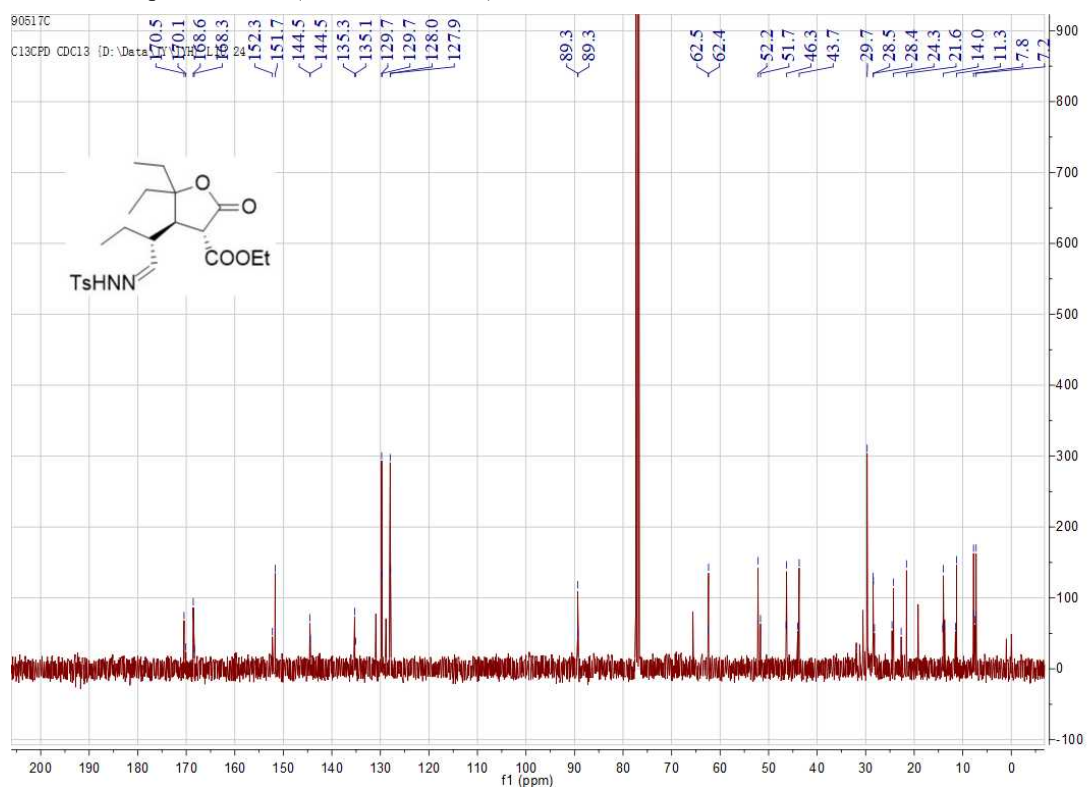

<sup>1</sup>H NMR of product **3an** (400 MHz, CDCl<sub>3</sub>)



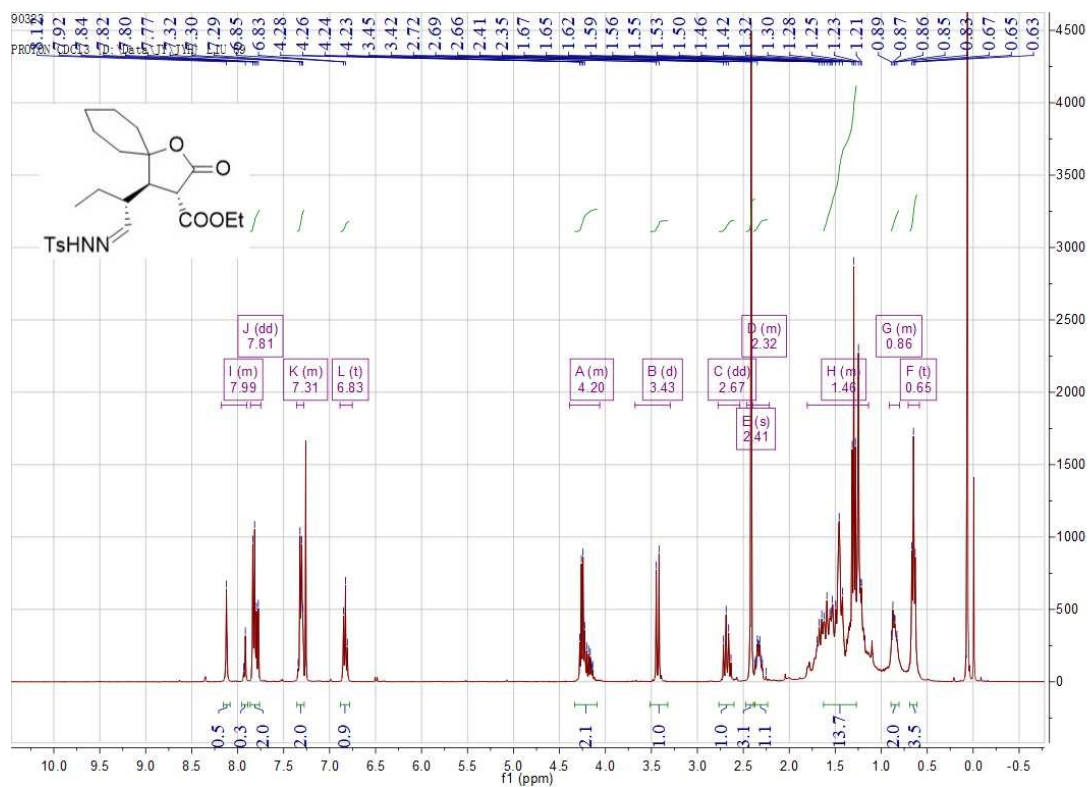

<sup>13</sup>C NMR of product **3an** (100 MHz, CDCl<sub>3</sub>)

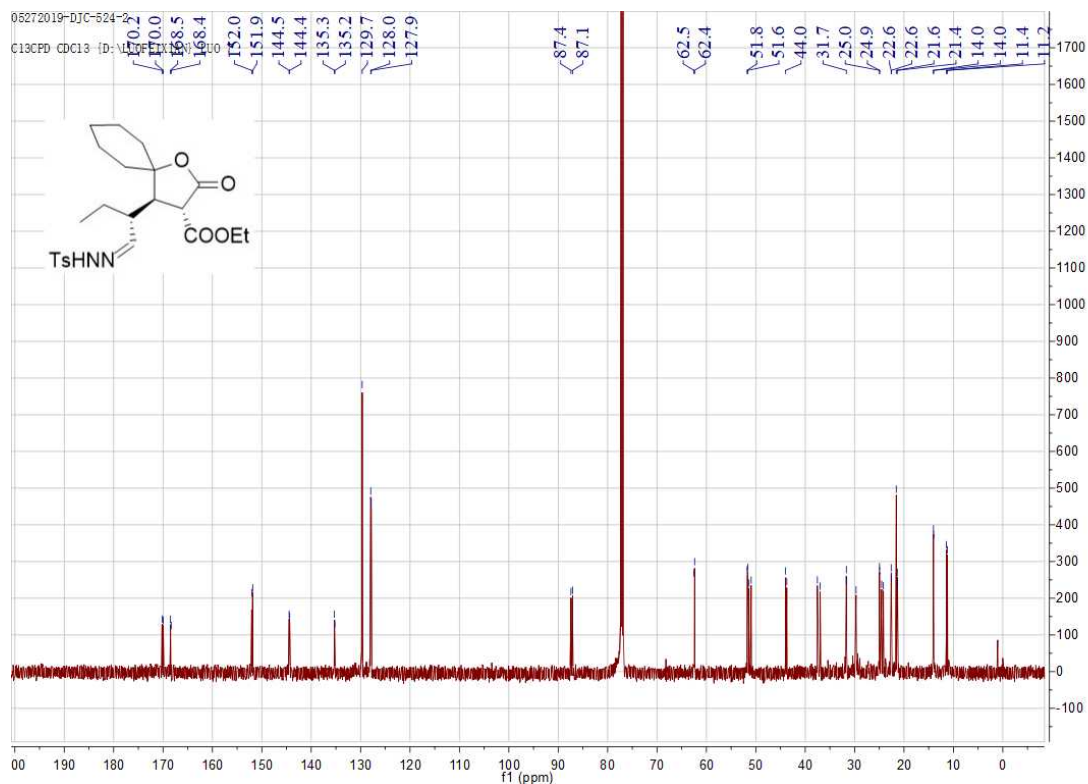

<sup>1</sup>H NMR of product **3ao** (400 MHz, CDCl<sub>3</sub>)

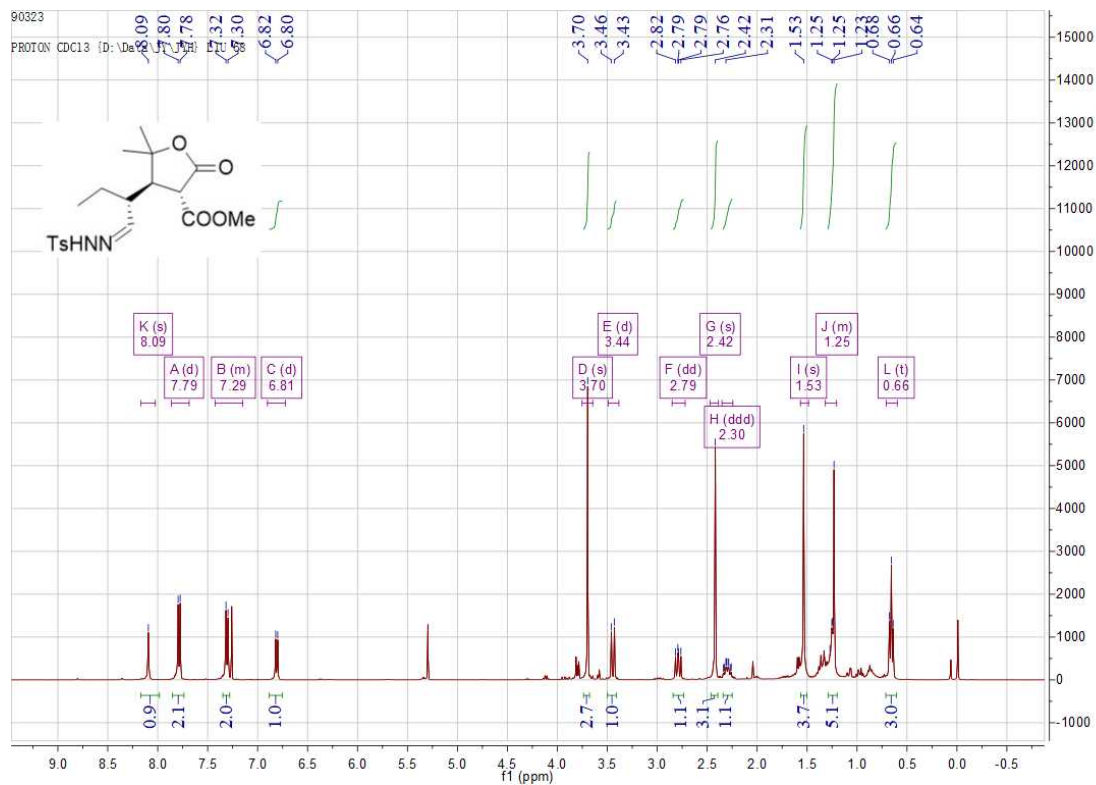

<sup>13</sup>C NMR of product **3ao** (100 MHz, CDCl<sub>3</sub>)

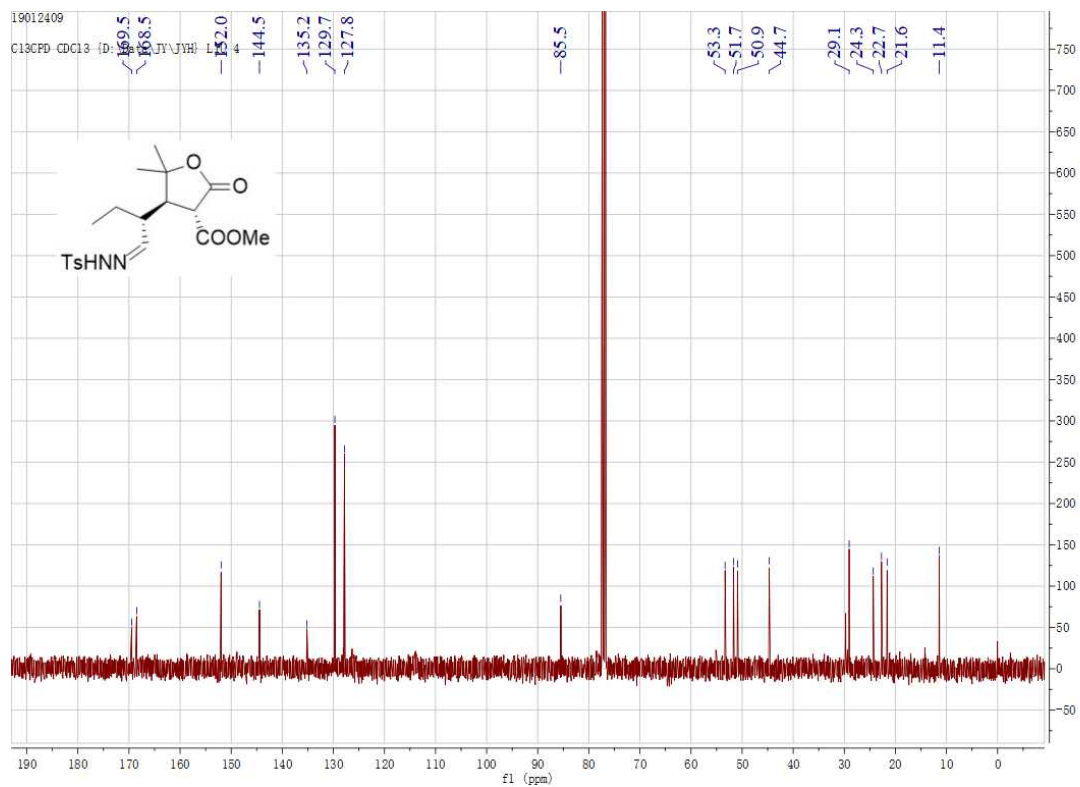

<sup>1</sup>H NMR of product **5** (400 MHz, CDCl<sub>3</sub>)

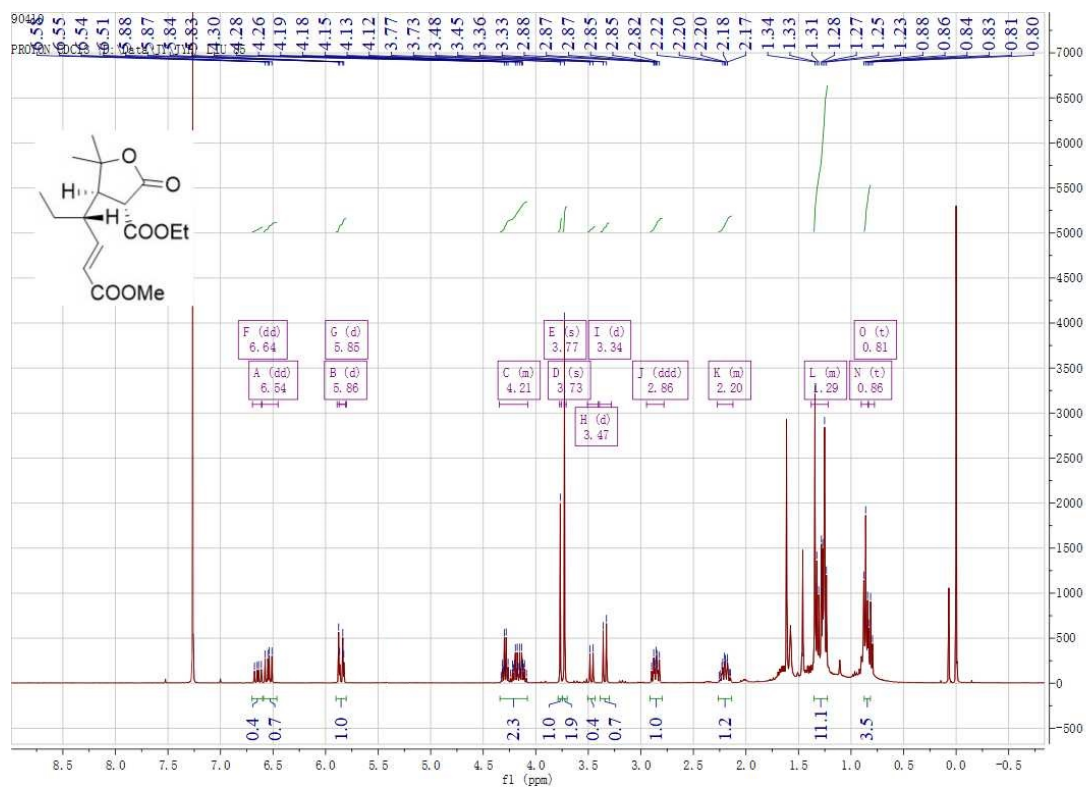

<sup>13</sup>C NMR of product 5 (100 MHz, CDCl<sub>3</sub>)

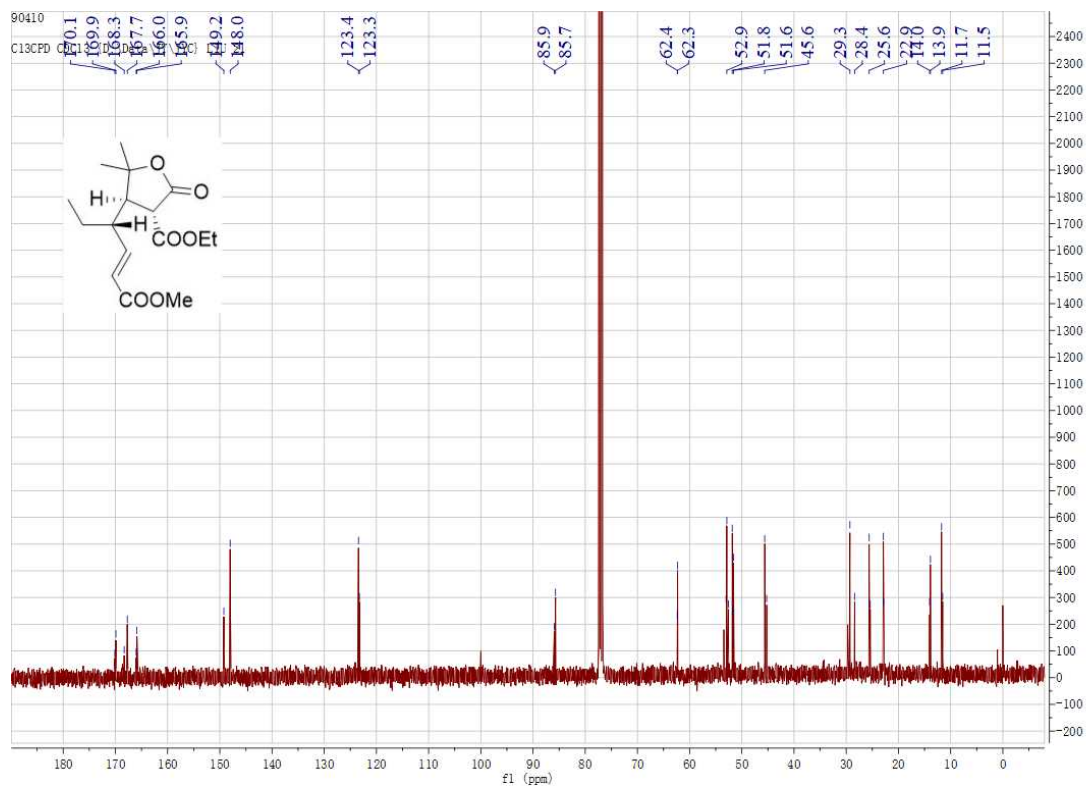

<sup>1</sup>H NMR of product 6 (400 MHz, CDCl<sub>3</sub>)

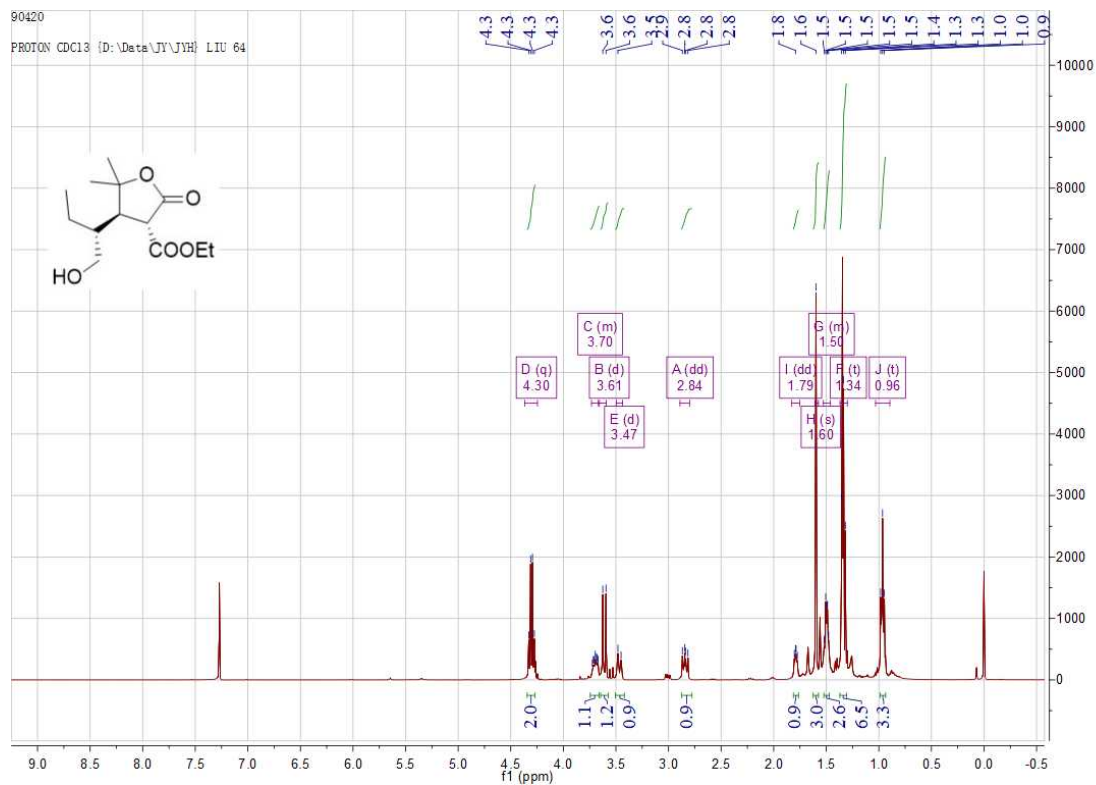

<sup>13</sup>C NMR of product 6 (100 MHz, CDCl<sub>3</sub>)

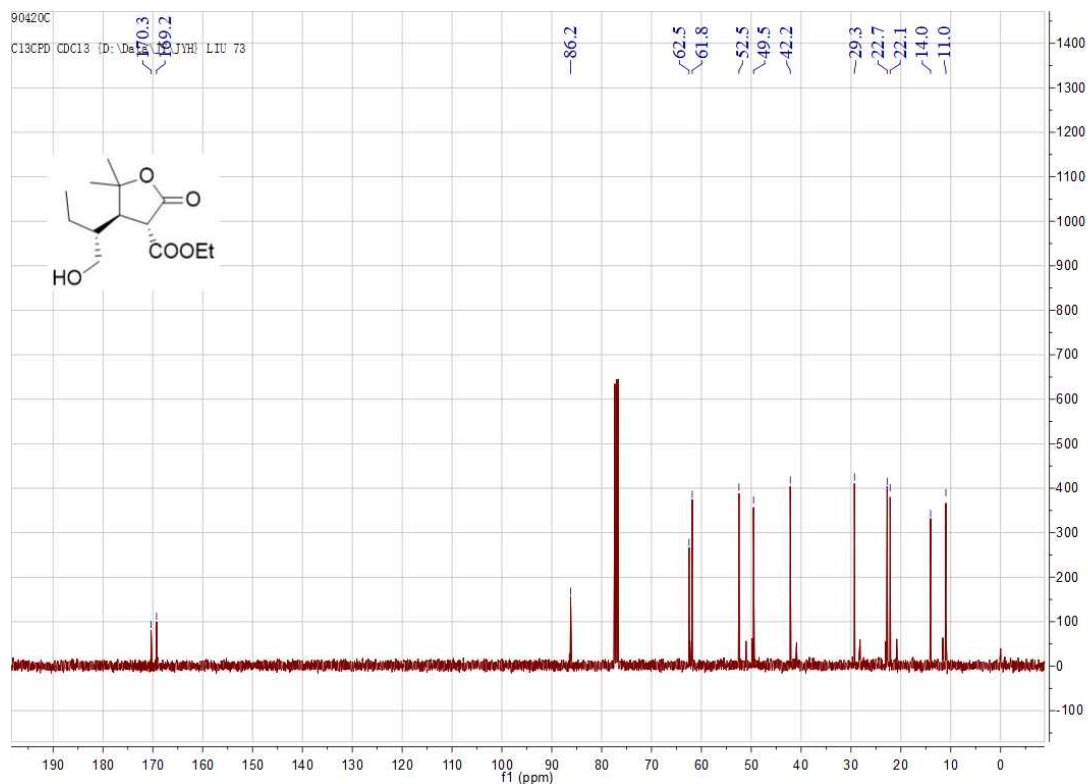

<sup>1</sup>H NMR of product 7 (400 MHz, CDCl<sub>3</sub>)

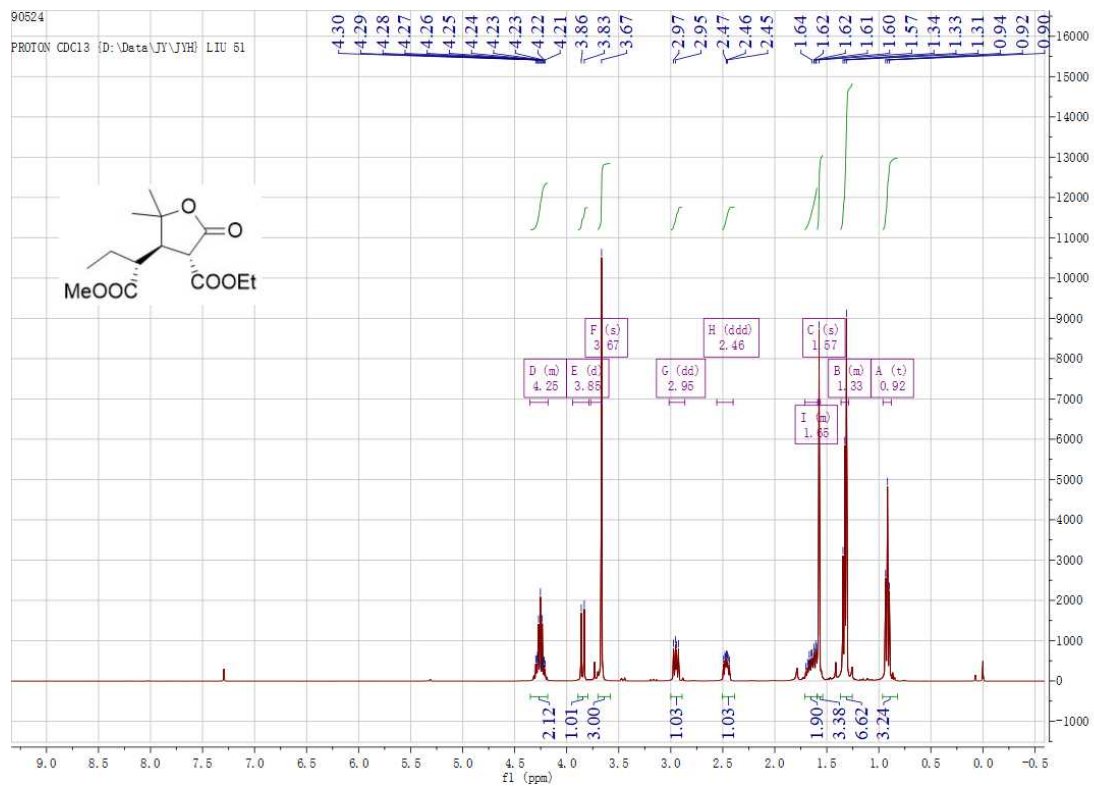

<sup>13</sup>C NMR of product 7 (100 MHz, CDCl<sub>3</sub>)

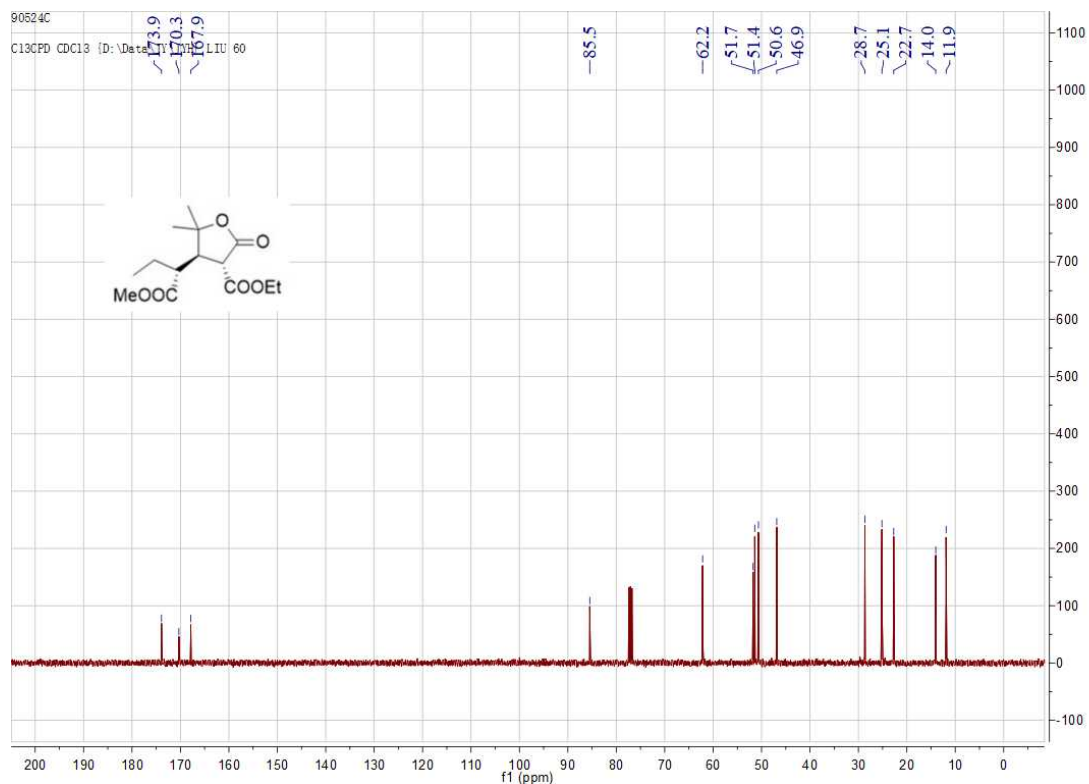



<sup>1</sup>H NMR of product **8** (400 MHz, CDCl<sub>3</sub>)

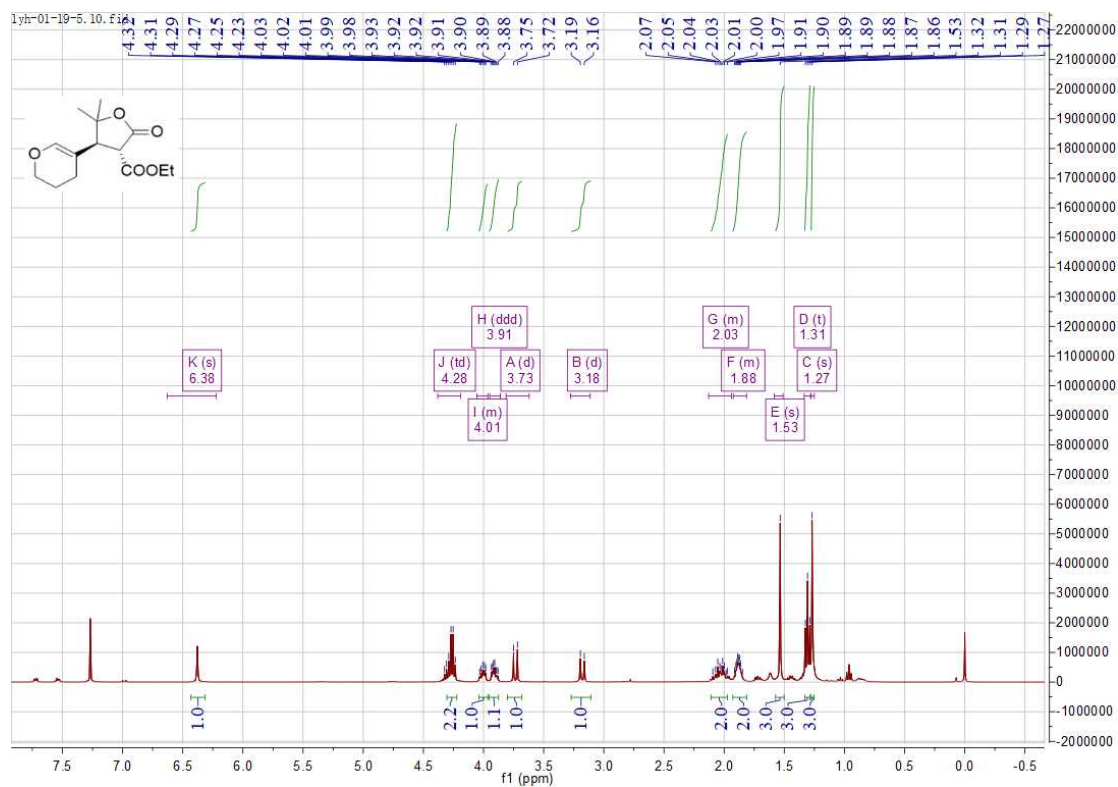

<sup>13</sup>C NMR of product **8** (100 MHz, CDCl<sub>3</sub>)

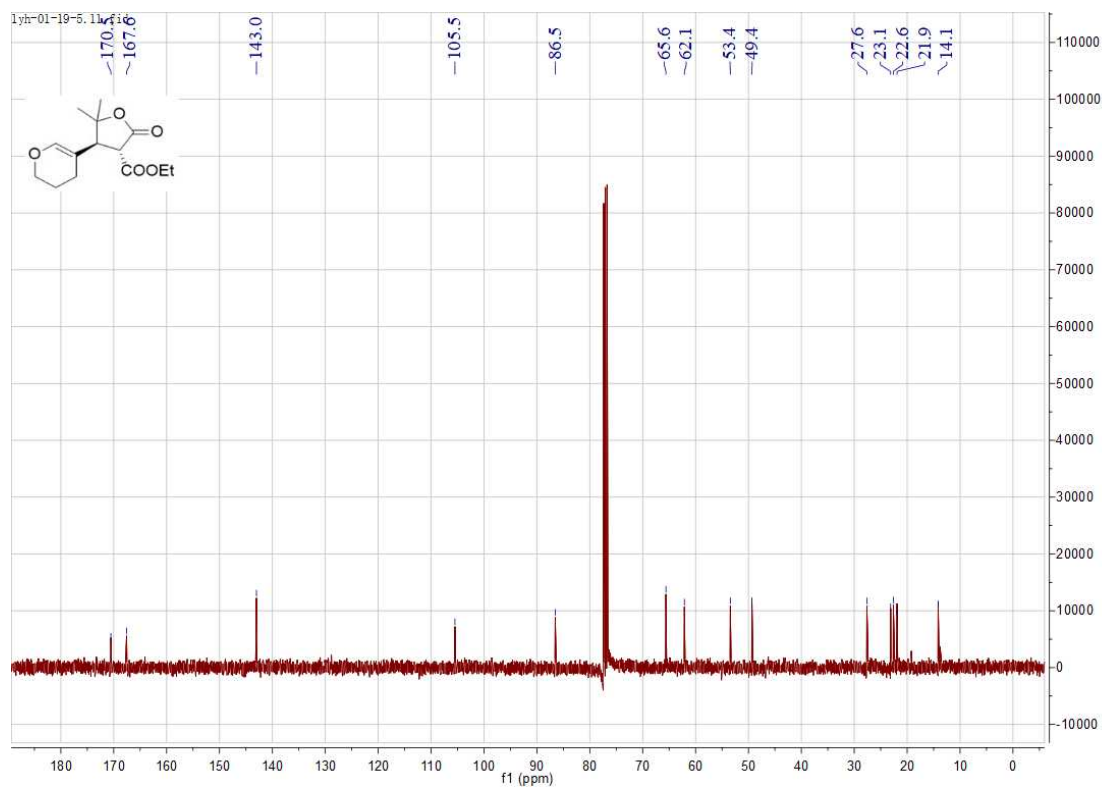

<sup>1</sup>H NMR of product **10** (400 MHz, CDCl<sub>3</sub>)

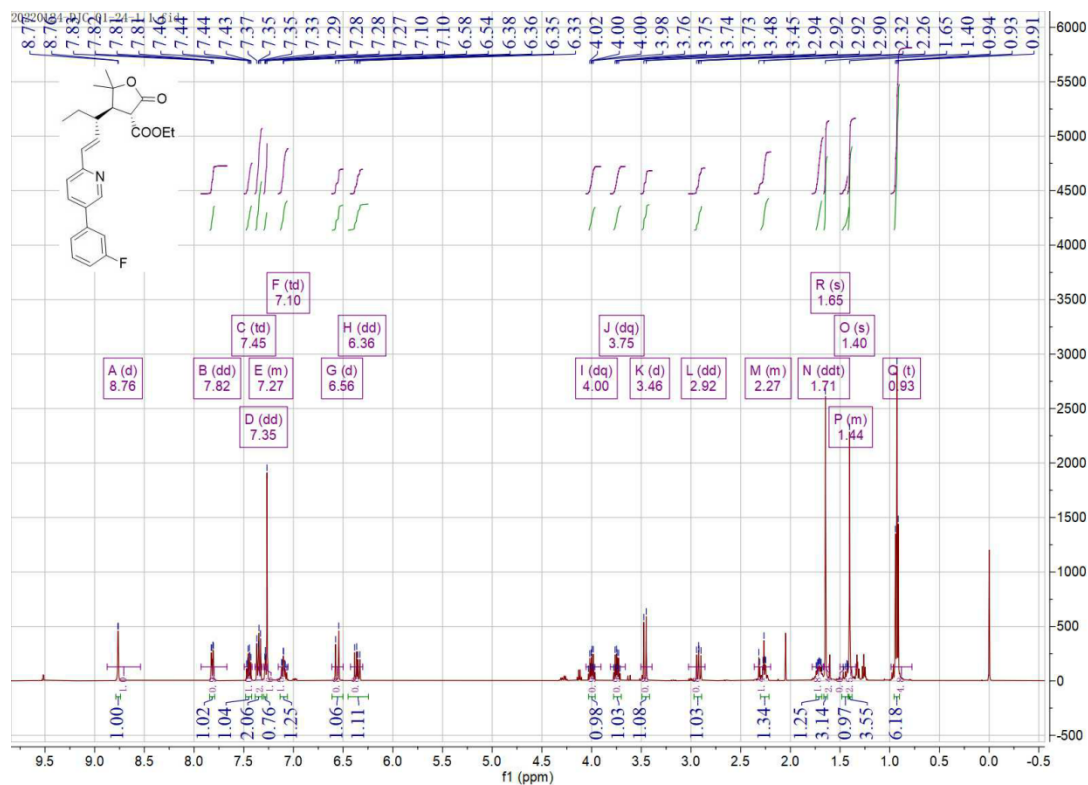

<sup>13</sup>C NMR of product **10** (100 MHz, CDCl<sub>3</sub>)

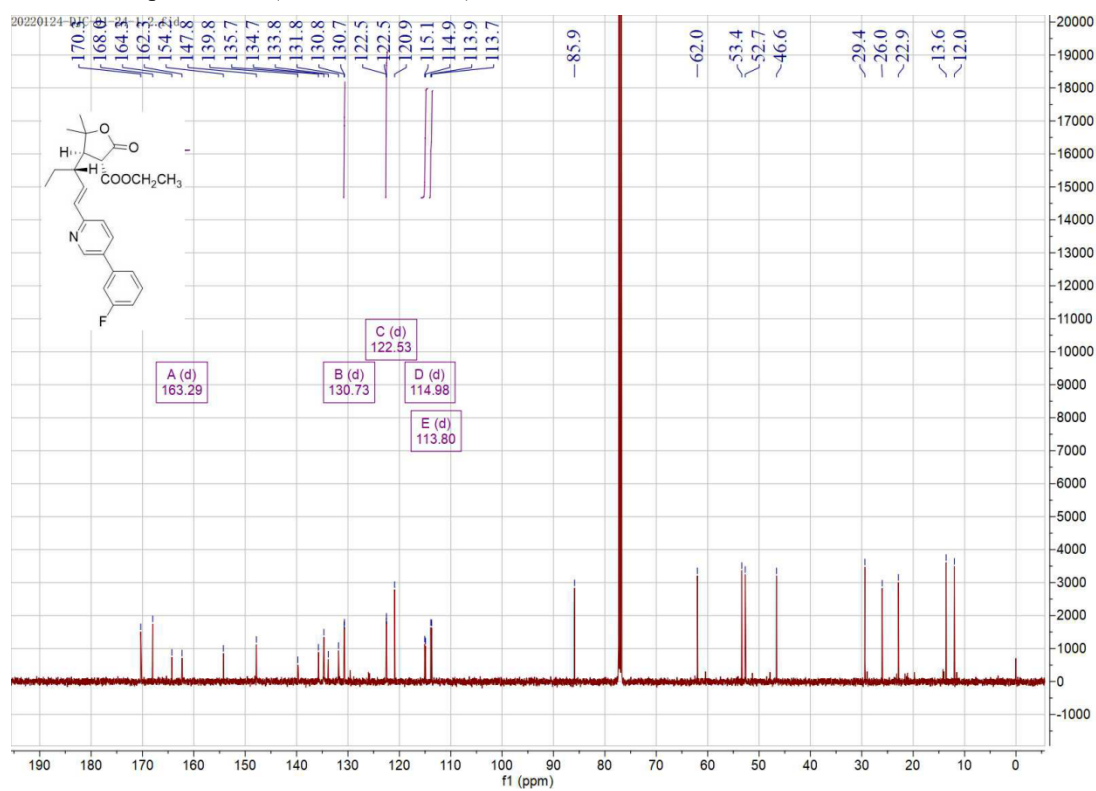

<sup>1</sup>H NMR of product **4k'** (400 MHz, CDCl<sub>3</sub>)

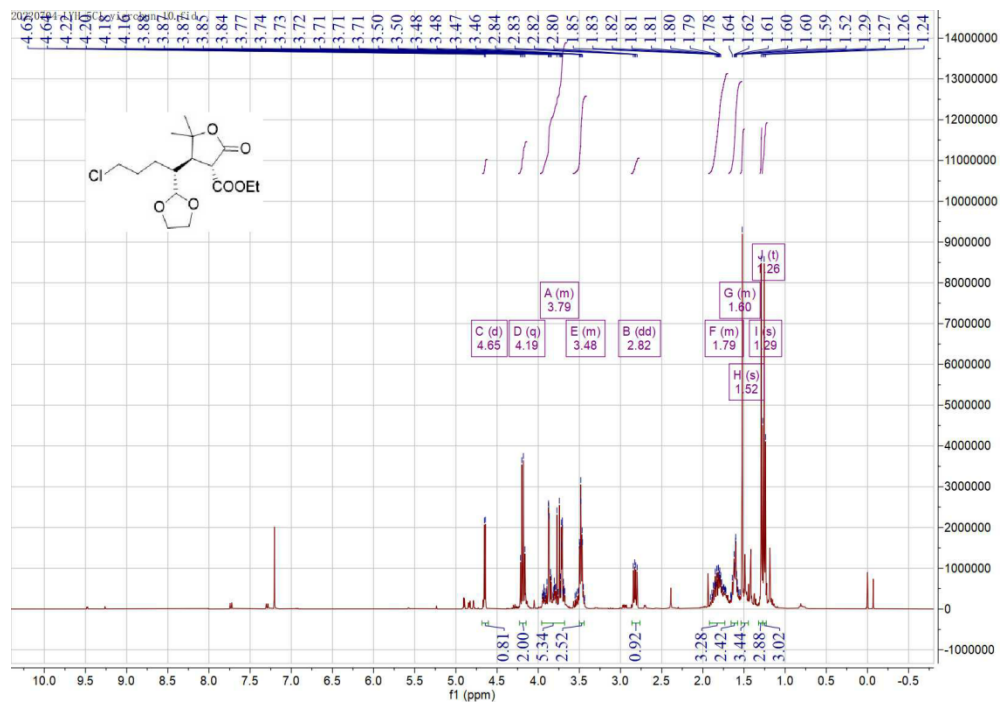

<sup>13</sup>C NMR of product 4k' (100 MHz, CDCl<sub>3</sub>)

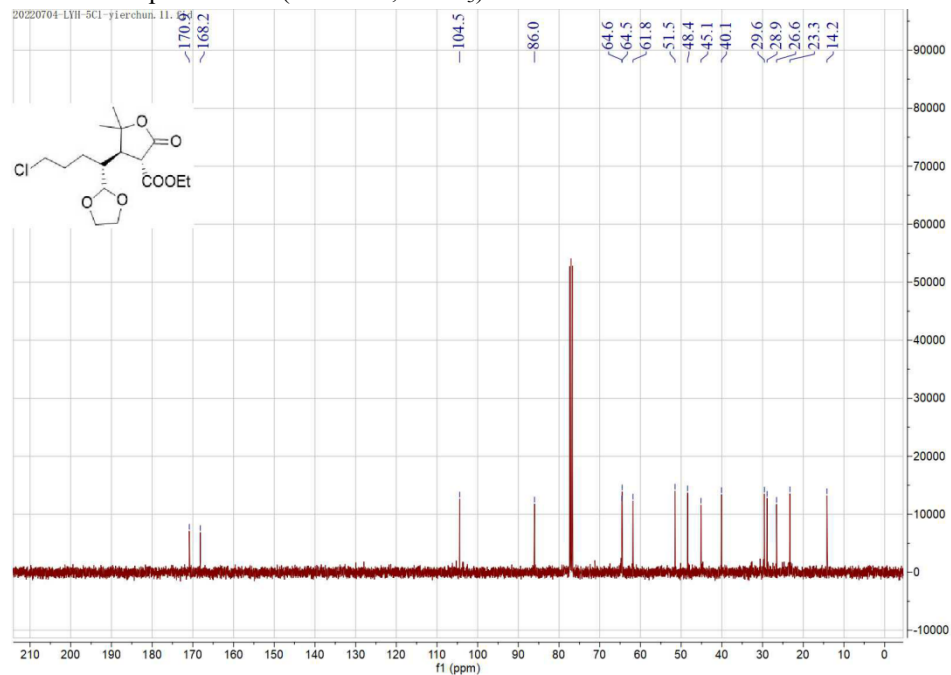

<sup>1</sup>H NMR of product 11 (400 MHz, CDCl<sub>3</sub>)



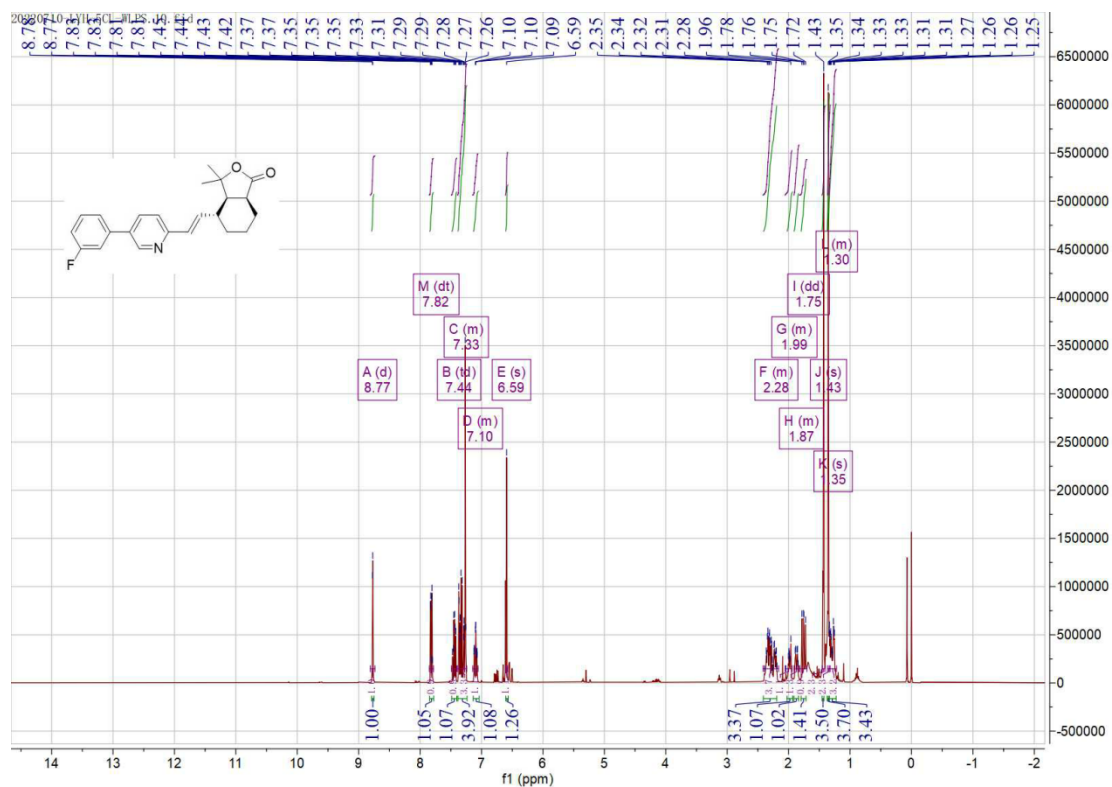

<sup>13</sup>C NMR of product **11** (100 MHz, CDCl<sub>3</sub>)

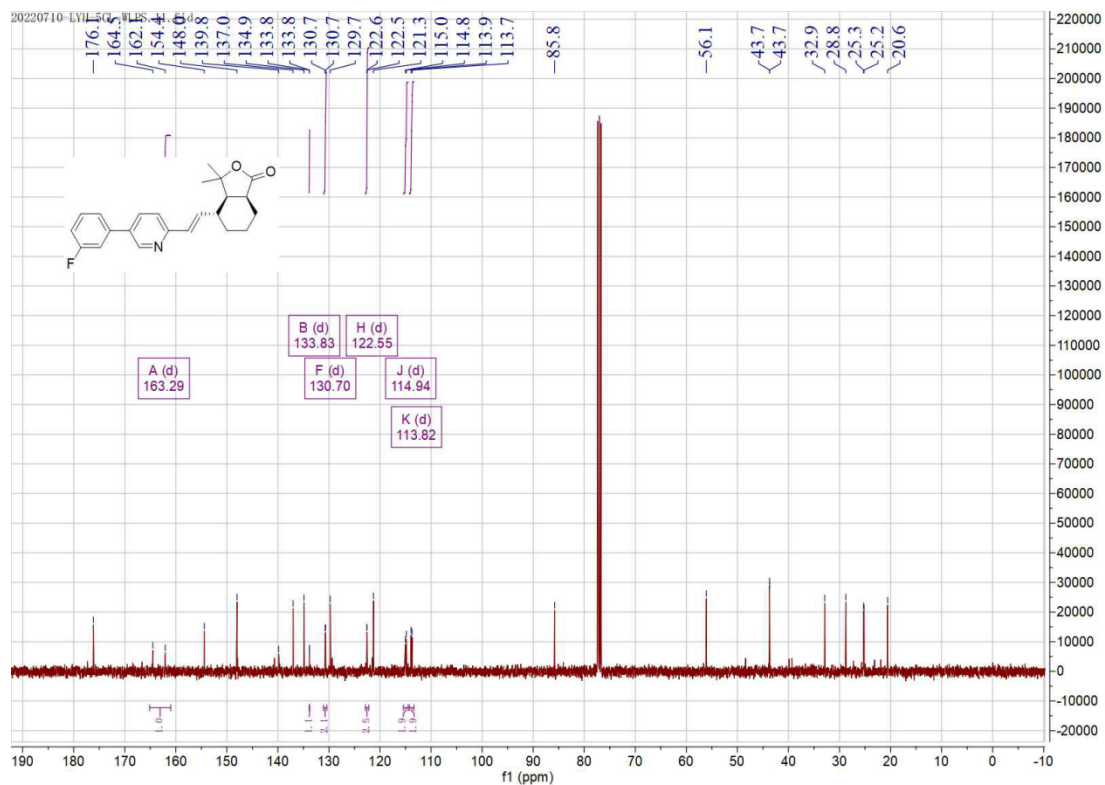

6. HPLC data for Michael Product 3a-3o

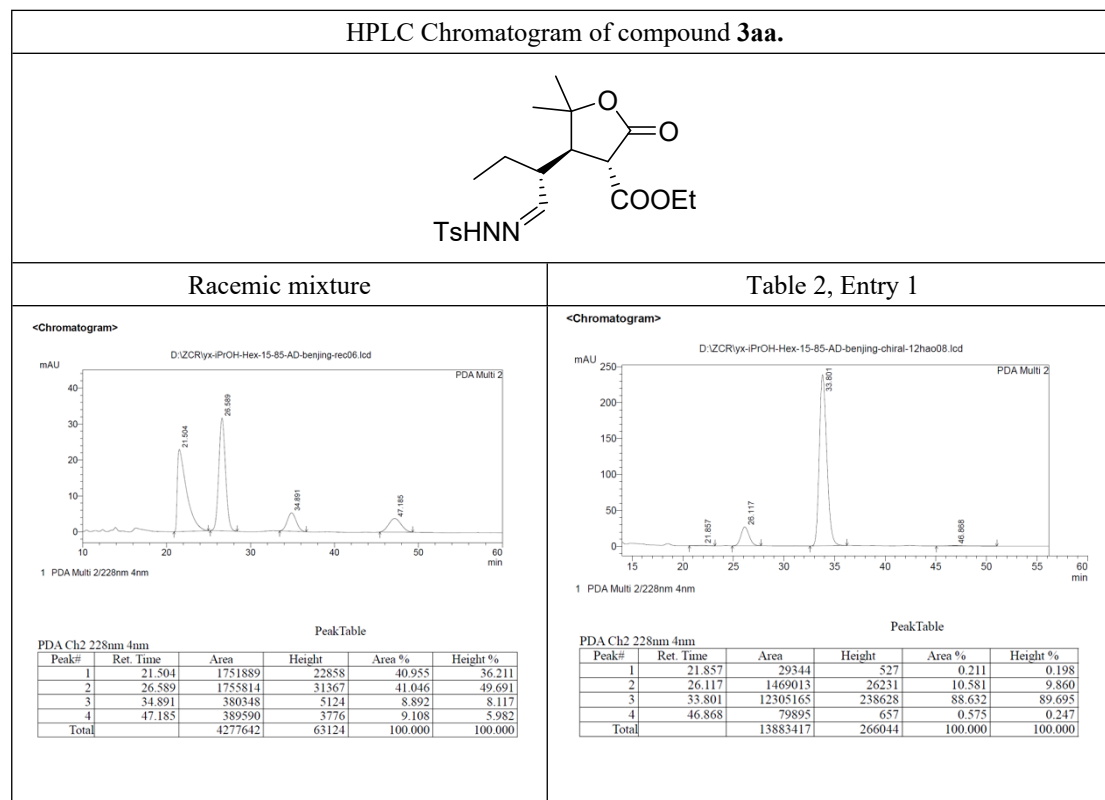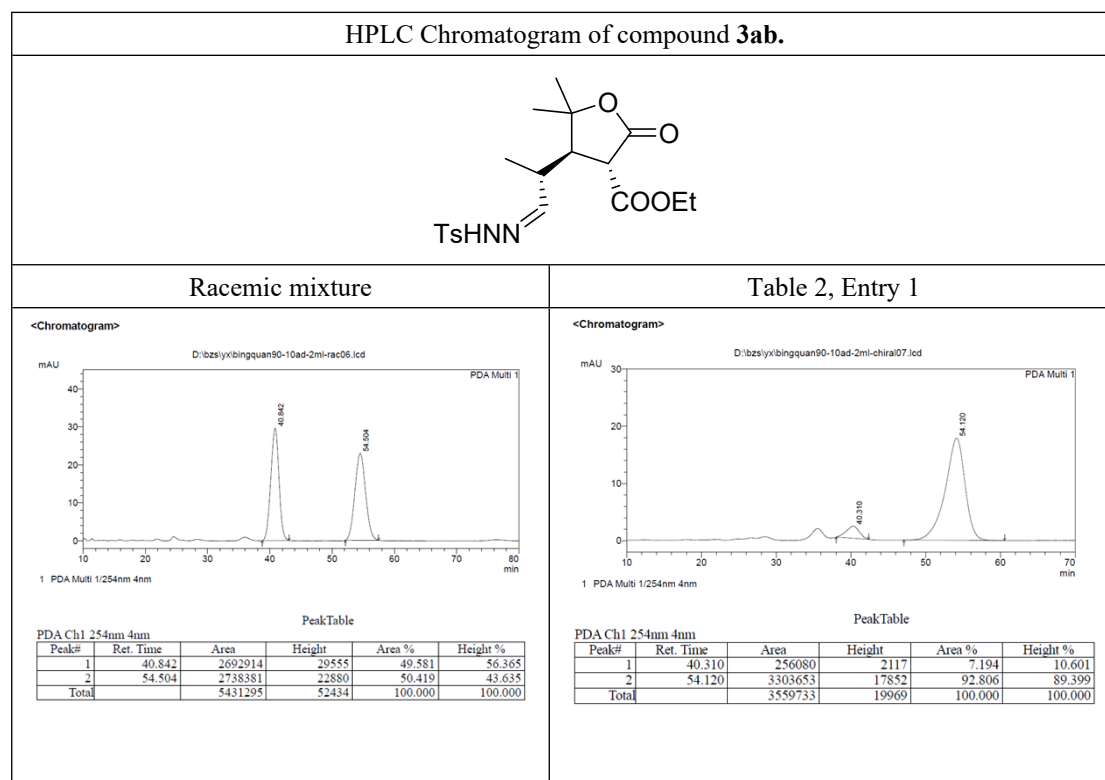

### HPLC Chromatogram of compound **3ac**.

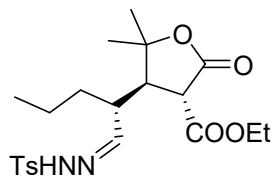

Racemic mixture

<Chromatogram>

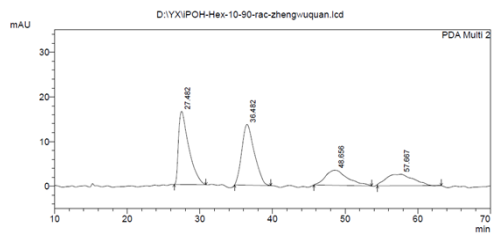

1 PDA Multi 2/228nm 4nm

PeakTable

| Peak# | Ret. Time | Area    | Height | Area %  | Height % |
|-------|-----------|---------|--------|---------|----------|
| 1     | 27.482    | 1614722 | 16381  | 34.792  | 45.553   |
| 2     | 36.482    | 1635791 | 13605  | 35.246  | 37.832   |
| 3     | 48.656    | 719773  | 3396   | 15.509  | 9.443    |
| 4     | 57.667    | 670769  | 2579   | 14.453  | 7.173    |
| Total |           | 4641056 | 35961  | 100.000 | 100.000  |

Table 2, Entry 1

<Chromatogram>

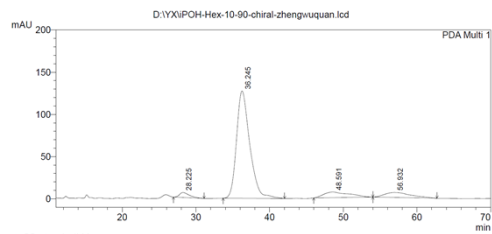

1 PDA Multi 1/228nm 4nm

PeakTable

| Peak# | Ret. Time | Area     | Height | Area %  | Height % |
|-------|-----------|----------|--------|---------|----------|
| 1     | 28.225    | 557778   | 5955   | 2.866   | 4.091    |
| 2     | 36.245    | 15875068 | 127167 | 81.579  | 87.352   |
| 3     | 48.591    | 1602732  | 6682   | 8.236   | 4.590    |
| 4     | 56.932    | 1424118  | 5776   | 7.318   | 3.968    |
| Total |           | 19459696 | 145581 | 100.000 | 100.000  |

HPLC Chromatogram of compound 3ad.

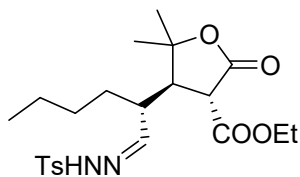

Racemic mixture of 3d

<Chromatogram>

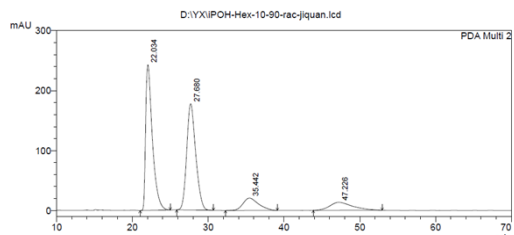

1 PDA Multi 2/228nm 4nm

PeakTable

| Peak# | Ret. Time | Area     | Height | Area %  | Height % |
|-------|-----------|----------|--------|---------|----------|
| 1     | 22.034    | 15028954 | 242963 | 42.361  | 53.470   |
| 2     | 27.680    | 14649482 | 177384 | 41.292  | 39.038   |
| 3     | 35.442    | 2945901  | 20673  | 8.303   | 4.550    |
| 4     | 47.226    | 3853838  | 13368  | 8.044   | 2.942    |
| Total |           | 35478175 | 454388 | 100.000 | 100.000  |

Table 2, Entry 1

<Chromatogram>

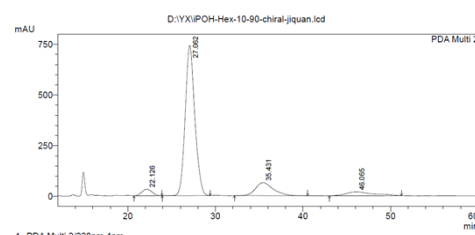

1 PDA Multi 2/228nm 4nm

PeakTable

| Peak# | Ret. Time | Area     | Height | Area %  | Height % |
|-------|-----------|----------|--------|---------|----------|
| 1     | 22.126    | 2573131  | 32804  | 3.551   | 3.823    |
| 2     | 27.062    | 56523260 | 741997 | 78.008  | 86.380   |
| 3     | 35.431    | 9029146  | 64553  | 12.461  | 7.524    |
| 4     | 46.065    | 4332774  | 19497  | 5.980   | 2.272    |
| Total |           | 72458311 | 857951 | 100.000 | 100.000  |

HPLC Chromatogram of compound 3ae.

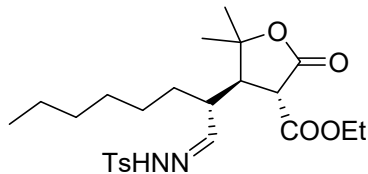

### Racemic mixture

<Chromatogram>

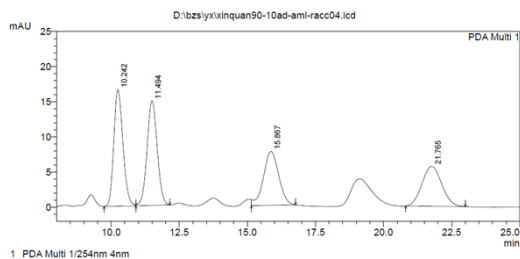

1 PDA Multi 1/254nm 4nm

PeakTable

| Peak# | Ret. Time | Area    | Height | Area %  | Height % |
|-------|-----------|---------|--------|---------|----------|
| 1     | 10.242    | 387817  | 16610  | 28.472  | 37.022   |
| 2     | 11.494    | 387467  | 14901  | 28.447  | 33.214   |
| 3     | 15.897    | 300127  | 7671   | 22.035  | 17.098   |
| 4     | 21.765    | 285666  | 5683   | 21.046  | 12.666   |
| Total |           | 1362077 | 44865  | 100.000 | 100.000  |

### Table 2, Entry 1

<Chromatogram>

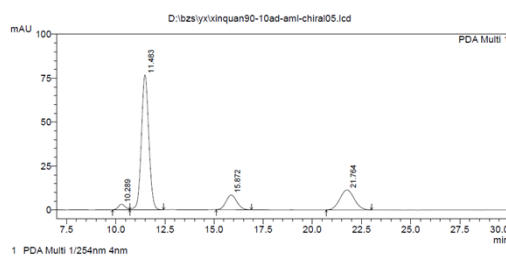

1 PDA Multi 1/254nm 4nm

PeakTable

| Peak# | Ret. Time | Area    | Height | Area %  | Height % |
|-------|-----------|---------|--------|---------|----------|
| 1     | 10.289    | 73744   | 3118   | 2.469   | 3.133    |
| 2     | 11.483    | 2015055 | 76684  | 67.475  | 77.048   |
| 3     | 15.872    | 320386  | 8374   | 10.728  | 8.413    |
| 4     | 21.764    | 577179  | 11352  | 19.327  | 11.406   |
| Total |           | 2986364 | 99528  | 100.000 | 100.000  |

### HPLC Chromatogram of compound 3af.

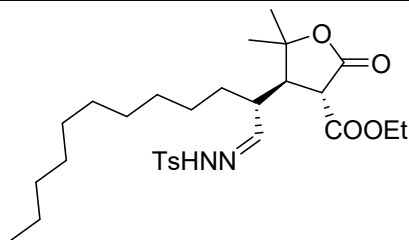

### Racemic mixture

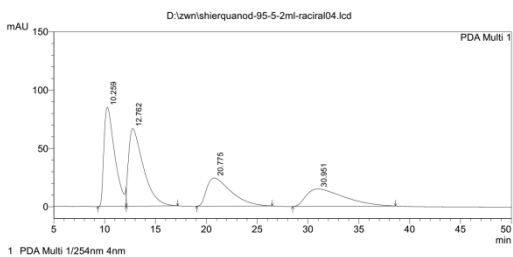

1 PDA Multi 1/254nm 4nm

PeakTable

| Peak# | Ret. Time | Area     | Height | Area %  | Height % |
|-------|-----------|----------|--------|---------|----------|
| 1     | 10.289    | 6346283  | 85059  | 30.309  | 44.586   |
| 2     | 12.762    | 6095483  | 66531  | 31.977  | 38.874   |
| 3     | 20.775    | 4029596  | 24204  | 19.245  | 12.687   |
| 4     | 30.951    | 3867349  | 14979  | 18.470  | 7.852    |
| Total |           | 20938711 | 190773 | 100.000 | 100.000  |

### Table 2, Entry 1

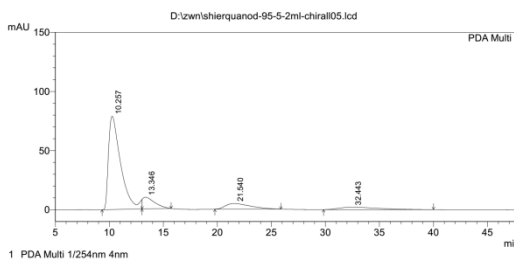

1 PDA Multi 1/254nm 4nm

PeakTable

| Peak# | Ret. Time | Area    | Height | Area %  | Height % |
|-------|-----------|---------|--------|---------|----------|
| 1     | 10.257    | 6196794 | 78931  | 75.050  | 82.508   |
| 2     | 13.346    | 767502  | 9898   | 9.295   | 10.346   |
| 3     | 21.540    | 781587  | 4791   | 9.466   | 5.008    |
| 4     | 32.443    | 510985  | 2045   | 6.189   | 2.138    |
| Total |           | 8256869 | 95665  | 100.000 | 100.000  |

### HPLC Chromatogram of compound 3ag.

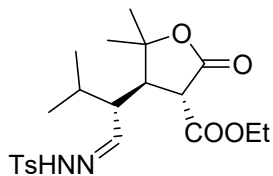

Racemic mixture

<Chromatogram>

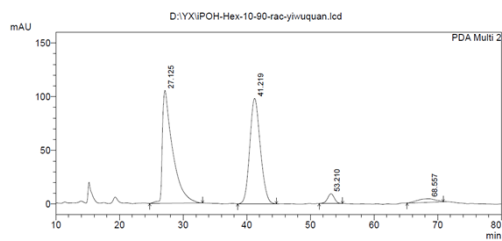

1 PDA Multi 2/228nm 4nm

PeakTable

| Peak# | Ret. Time | Area     | Height | Area %  | Height % |
|-------|-----------|----------|--------|---------|----------|
| 1     | 27.125    | 11755649 | 105231 | 48.021  | 48.699   |
| 2     | 41.219    | 11343372 | 98284  | 46.336  | 45.484   |
| 3     | 53.210    | 686309   | 9172   | 2.803   | 4.245    |
| 4     | 68.557    | 695115   | 3397   | 2.839   | 1.572    |
| Total |           | 24480445 | 216083 | 100.000 | 100.000  |

Table 2, Entry 1

<Chromatogram>

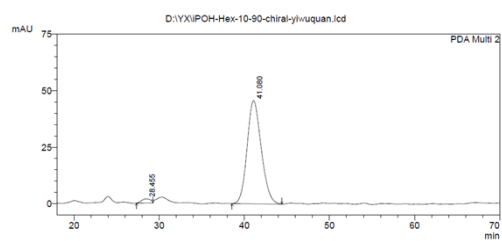

1 PDA Multi 2/228nm 4nm

PeakTable

| Peak# | Ret. Time | Area    | Height | Area %  | Height % |
|-------|-----------|---------|--------|---------|----------|
| 1     | 28.455    | 140840  | 1846   | 2.597   | 3.883    |
| 2     | 41.080    | 5281293 | 45685  | 97.403  | 96.117   |
| Total |           | 5422133 | 47531  | 100.000 | 100.000  |

HPLC Chromatogram of compound 3ah.

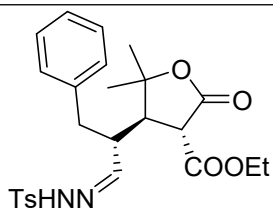

Racemic mixture

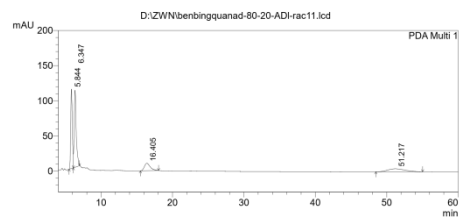

1 PDA Multi 1/254nm 4nm

1 PDA Multi 1/254nm,4nm

PeakTable

| Peak# | Ret. Time | Area    | Height | Area %  | Height % |
|-------|-----------|---------|--------|---------|----------|
| 1     | 5.844     | 1737039 | 112937 | 33.272  | 47.579   |
| 2     | 6.347     | 2164964 | 109558 | 41.468  | 46.155   |
| 3     | 16.405    | 609804  | 10627  | 11.680  | 4.477    |
| 4     | 51.217    | 708992  | 4248   | 13.580  | 1.789    |
| 总计    |           | 5220799 | 237369 | 100.000 | 100.000  |

Table 2, Entry 2

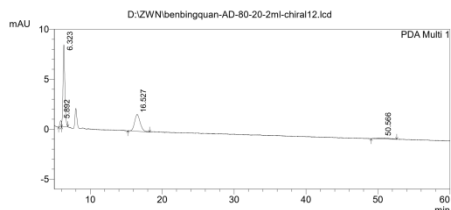

1 PDA Multi 1/254nm,4nm

PeakTable

| Peak# | Ret. Time | Area   | Height | Area %  | Height % |
|-------|-----------|--------|--------|---------|----------|
| 1     | 5.892     | 9756   | 629    | 3.780   | 5.933    |
| 2     | 6.323     | 146457 | 8198   | 56.751  | 77.312   |
| 3     | 16.527    | 90791  | 1679   | 35.181  | 15.833   |
| 4     | 50.566    | 11065  | 98     | 4.288   | 0.921    |
| 总计    |           | 258069 | 10603  | 100.000 | 100.000  |

HPLC Chromatogram of compound 3ai.

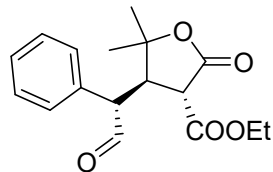

Racemic mixture

Table 2, Entry 2

<Chromatogram>

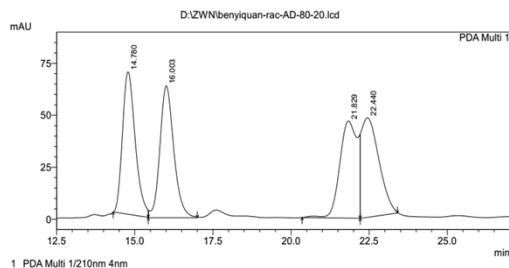

| PeakTable |           |         |        |         |          |
|-----------|-----------|---------|--------|---------|----------|
| Peak#     | Ret. Time | Area    | Height | Area %  | Height % |
| 1         | 14.780    | 1951010 | 68521  | 25.555  | 30.242   |
| 2         | 16.003    | 1963916 | 63441  | 25.724  | 28.000   |
| 3         | 21.829    | 1852270 | 46693  | 24.327  | 20.668   |
| 4         | 22.440    | 1862314 | 47918  | 24.393  | 21.149   |
| Total     |           | 7634509 | 226572 | 100.000 | 100.000  |

<Chromatogram>

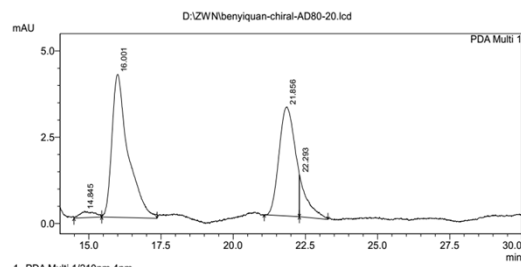

| PeakTable |           |        |        |         |          |
|-----------|-----------|--------|--------|---------|----------|
| Peak#     | Ret. Time | Area   | Height | Area %  | Height % |
| 1         | 14.845    | 6413   | 193    | 2.079   | 2.222    |
| 2         | 16.001    | 161010 | 4141   | 52.190  | 47.566   |
| 3         | 21.856    | 119087 | 3159   | 38.601  | 36.280   |
| 4         | 22.293    | 21996  | 1213   | 7.130   | 13.932   |
| Total     |           | 308506 | 8707   | 100.000 | 100.000  |

### HPLC Chromatogram of compound 3aj.

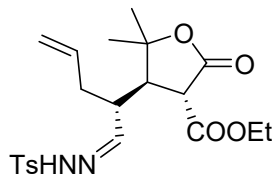

Racemic mixture

Table 2, Entry 1

<Chromatogram>

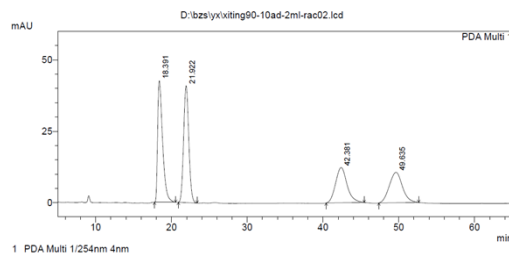

| PeakTable |           |         |        |         |          |
|-----------|-----------|---------|--------|---------|----------|
| Peak#     | Ret. Time | Area    | Height | Area %  | Height % |
| 1         | 18.391    | 1946307 | 42608  | 30.083  | 39.954   |
| 2         | 21.922    | 1936803 | 40988  | 29.937  | 38.435   |
| 3         | 42.381    | 1303773 | 12366  | 20.152  | 11.596   |
| 4         | 49.635    | 1282821 | 10681  | 19.828  | 10.015   |
| Total     |           | 6469704 | 106642 | 100.000 | 100.000  |

<Chromatogram>

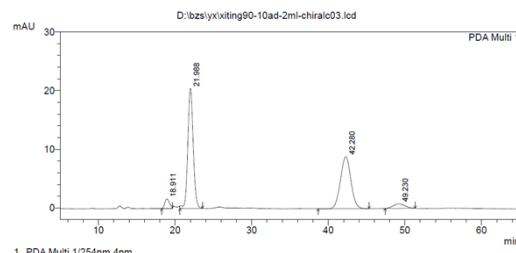

| PeakTable |           |         |        |         |          |
|-----------|-----------|---------|--------|---------|----------|
| Peak#     | Ret. Time | Area    | Height | Area %  | Height % |
| 1         | 18.911    | 71592   | 1630   | 3.593   | 5.142    |
| 2         | 21.988    | 1000346 | 20453  | 50.208  | 64.537   |
| 3         | 42.280    | 838091  | 8841   | 42.065  | 27.897   |
| 4         | 49.230    | 82365   | 768    | 4.134   | 2.424    |
| Total     |           | 1992394 | 31692  | 100.000 | 100.000  |

### HPLC Chromatogram of compound 3ak.

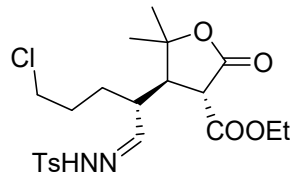

Racemic mixture

Table 2, Entry 1

<Chromatogram>

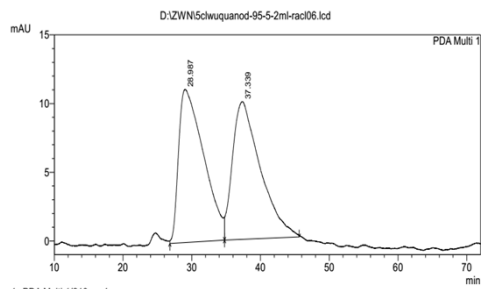

| Peak# | Ret. Time | Area    | Height | Area %  | Height % |
|-------|-----------|---------|--------|---------|----------|
| 1     | 28.987    | 2821282 | 11152  | 49.970  | 52.660   |
| 2     | 37.339    | 2824677 | 10025  | 50.030  | 47.340   |
| Total |           | 5645959 | 21177  | 100.000 | 100.000  |

<Chromatogram>

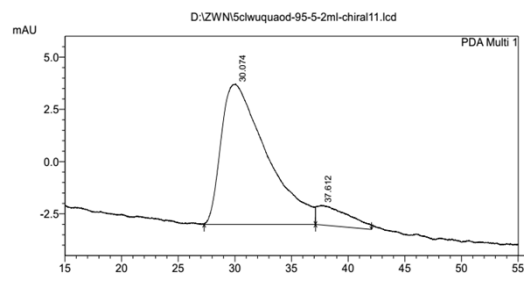

| Peak# | Ret. Time | Area    | Height | Area %  | Height % |
|-------|-----------|---------|--------|---------|----------|
| 1     | 30.074    | 1869670 | 6717   | 90.997  | 87.735   |
| 2     | 37.612    | 184986  | 939    | 9.003   | 12.265   |
| Total |           | 2054657 | 7656   | 100.000 | 100.000  |

HPLC Chromatogram of compound 3a.

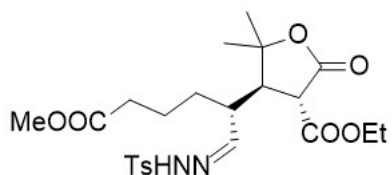

Racemic mixture

Table 2, Entry 1

<Chromatogram>

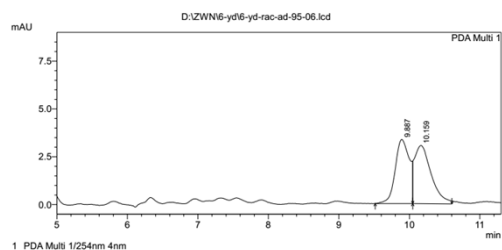

| Peak# | Ret. Time | Area  | Height | Area %  | Height % |
|-------|-----------|-------|--------|---------|----------|
| 1     | 9.887     | 47646 | 3347   | 49.204  | 52.366   |
| 2     | 10.159    | 49186 | 3045   | 50.796  | 47.634   |
| Total |           | 96832 | 6392   | 100.000 | 100.000  |

<Chromatogram>

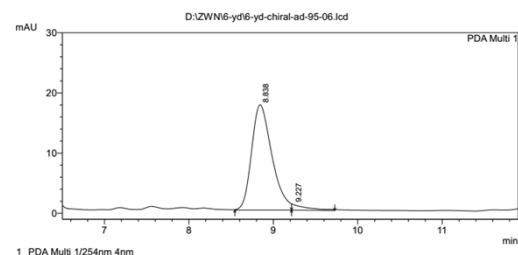

| Peak# | Ret. Time | Area   | Height | Area %  | Height % |
|-------|-----------|--------|--------|---------|----------|
| 1     | 8.838     | 299987 | 17500  | 96.160  | 94.885   |
| 2     | 9.227     | 11621  | 943    | 3.840   | 5.115    |
| Total |           | 302609 | 18445  | 100.000 | 100.000  |

### HPLC Chromatogram of compound **3am**.

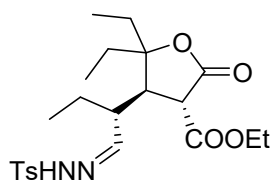

#### Racemic mixture

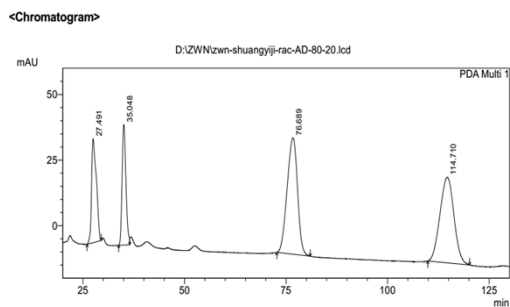

| Peak# | Ret. Time | Area     | Height | Area %  | Height % |
|-------|-----------|----------|--------|---------|----------|
| 1     | 27.491    | 3238450  | 39624  | 14.756  | 24.382   |
| 2     | 35.048    | 3038338  | 45937  | 13.799  | 28.266   |
| 3     | 76.689    | 7874210  | 443361 | 35.879  | 27.293   |
| 4     | 114.710   | 7805755  | 32599  | 35.567  | 20.059   |
| Total |           | 21946753 | 162515 | 100.000 | 100.000  |

#### Table 2, Entry 1

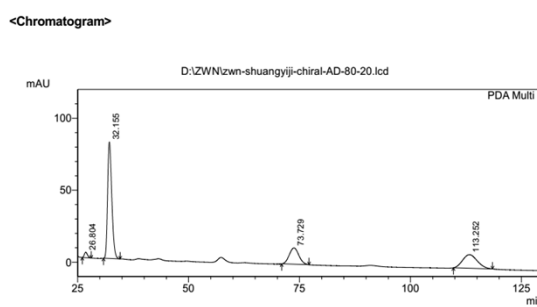

| Peak# | Ret. Time | Area    | Height | Area %  | Height % |
|-------|-----------|---------|--------|---------|----------|
| 1     | 26.804    | 188105  | 3870   | 2.005   | 3.659    |
| 2     | 32.155    | 5307401 | 81060  | 56.581  | 76.639   |
| 3     | 73.729    | 1711819 | 11379  | 18.249  | 10.758   |
| 4     | 113.252   | 2172858 | 9461   | 23.164  | 8.945    |
| Total |           | 9380183 | 105770 | 100.000 | 100.000  |

### HPLC Chromatogram of compound **3an**.

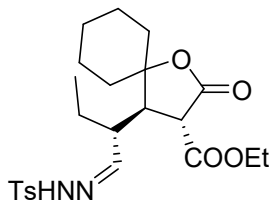

#### Racemic mixture

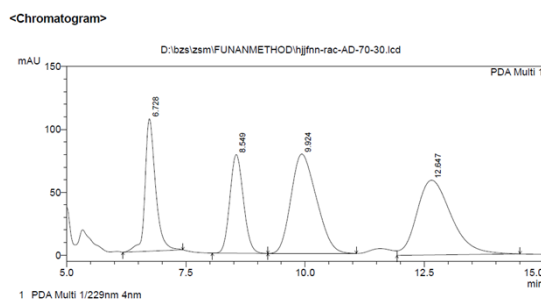

| Peak# | Ret. Time | Area    | Height | Area %  | Height % |
|-------|-----------|---------|--------|---------|----------|
| 1     | 6.728     | 1622844 | 105351 | 17.800  | 32.661   |
| 2     | 8.549     | 1558314 | 78574  | 17.092  | 24.360   |
| 3     | 9.924     | 2936254 | 79154  | 32.205  | 24.539   |
| 4     | 12.647    | 2999883 | 59479  | 32.903  | 18.440   |
| Total |           | 9117295 | 322557 | 100.000 | 100.000  |

#### Table 2, Entry 1

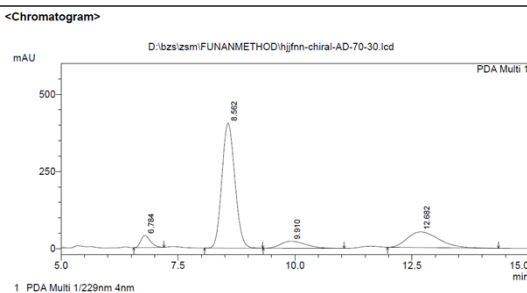

| Peak# | Ret. Time | Area     | Height | Area %  | Height % |
|-------|-----------|----------|--------|---------|----------|
| 1     | 6.784     | 561701   | 39444  | 4.821   | 7.609    |
| 2     | 8.562     | 7858074  | 405356 | 67.440  | 78.193   |
| 3     | 9.910     | 843546   | 22763  | 7.239   | 4.391    |
| 4     | 12.682    | 2388671  | 50840  | 20.500  | 9.807    |
| Total |           | 11651992 | 518403 | 100.000 | 100.000  |

### HPLC Chromatogram of compound **3ao**.



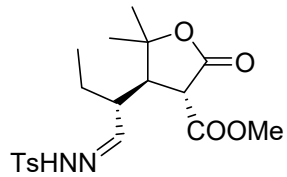

Racemic mixture

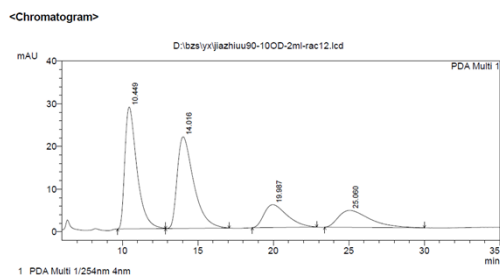

PeakTable

| Peak# | Ret. Time | Area    | Height | Area %  | Height % |
|-------|-----------|---------|--------|---------|----------|
| 1     | 10.449    | 1589694 | 28564  | 36.417  | 48.126   |
| 2     | 14.016    | 1635619 | 21472  | 37.469  | 36.178   |
| 3     | 19.987    | 566808  | 5337   | 12.985  | 8.991    |
| 4     | 25.060    | 573136  | 3979   | 13.129  | 6.705    |
| Total |           | 4365257 | 59351  | 100.000 | 100.000  |

Table 2, Entry 1

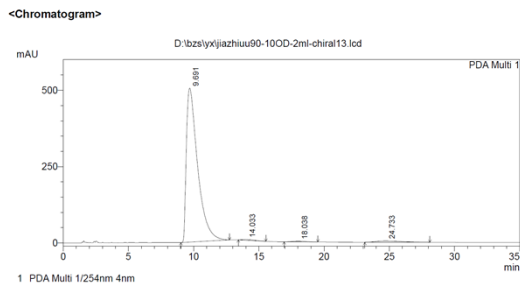

PeakTable

| Peak# | Ret. Time | Area     | Height | Area %  | Height % |
|-------|-----------|----------|--------|---------|----------|
| 1     | 9.691     | 30285778 | 503967 | 96.924  | 98.118   |
| 2     | 14.033    | 148036   | 2466   | 0.474   | 0.480    |
| 3     | 18.038    | 166221   | 2339   | 0.532   | 0.455    |
| 4     | 24.733    | 646951   | 4863   | 2.070   | 0.947    |
| Total |           | 31246986 | 513635 | 100.000 | 100.000  |
